# Supplementary material
Source: publisher figshare collection journal article supplement (https://gsajournals.figshare.com/ndownloader/files/14601857)
Supplement: Supplementary file 1 [file 14601857]

## Sheet: GOCOMPONENT
Table S3 Complete results from GOrilla GO term enrichment analysis of 6mA-containing genes
GO Term	Description	P-value	FDR q-value	Enrichment	N	B	n	b	Genes
GO:0044459	plasma membrane part	1.46e-23	1.71e-20	1.65	7301	598	2054	278	[inaE - inactivation no afterpotential e, scrib - scribbled, Task6 - cg9637 gene product from transcript cg9637-rd, trpgamma - cg5996 gene product from transcript cg5996-rd, fz - frizzled, dlp - dally-like, DmsR-2 - dromyosuppressin receptor
GO:0005886	plasma membrane	1.58e-23	9.23e-21	1.72	7301	497	2054	241	[CG4839 - cg4839 gene product from transcript cg4839-ra, CG42389 - cg42389 gene product from transcript cg42389-re, fz - frizzled, CG42796 - cg42796 gene product from transcript cg42796-re, Pli - pellino, dlp - dally-like, bib - big brain, S
GO:0016020	membrane	7.29e-23	2.84e-20	1.48	7301	985	2054	410	[inaE - inactivation no afterpotential e, Galk - galactokinase, Cyt-c-d - cytochrome c distal, scrib - scribbled, CG13375 - cg13375 gene product from transcript cg13375-ra, CG42389 - cg42389 gene product from transcript cg42389-re, Pli - pel
GO:0031226	intrinsic component of plasma membrane	5.96e-15	1.74e-12	1.7	7301	333	2054	159	[5-HT2 - serotonin receptor 2, ru - roughoid, Task6 - cg9637 gene product from transcript cg9637-rd, if - inflated, trpgamma - cg5996 gene product from transcript cg5996-rd, GNBP1 - gram-negative bacteria binding protein 1, fz - frizzled, CG
GO:0044464	cell part	1.28e-14	3e-12	1.12	7301	4244	2054	1338	[Galk - galactokinase, CG42708 - cg42708 gene product from transcript cg42708-ra, Task6 - cg9637 gene product from transcript cg9637-rd, scrib - scribbled, CG8771 - cg8771 gene product from transcript cg8771-rb, CG5021 - cg5021 gene product fr
GO:0005887	integral component of plasma membrane	3.38e-14	6.59e-12	1.69	7301	322	2054	153	[5-HT2 - serotonin receptor 2, ru - roughoid, Task6 - cg9637 gene product from transcript cg9637-rd, if - inflated, trpgamma - cg5996 gene product from transcript cg5996-rd, fz - frizzled, CG1688 - cg1688 gene product from transcript cg1688-
GO:0030054	cell junction	4.62e-14	7.72e-12	2.2	7301	113	2054	70	[p120ctn - adherens junction protein p120, fw - furrowed, scrib - scribbled, if - inflated, sdt - stardust, Mdr65 - multiple drug resistance 65, CG15630 - cg15630 gene product from transcript cg15630-ra, bib - big brain, Grip - glutamate
GO:0097458	neuron part	4.04e-11	5.91e-09	1.55	7301	377	2054	164	[5-HT2 - serotonin receptor 2, scrib - scribbled, Mmp2 - matrix metalloproteinase 2, X11Lbeta - cg32677 gene product from transcript cg32677-rb, trpgamma - cg5996 gene product from transcript cg5996-rd, cmpy - crimpy, CG6053 - cg6053 gene pr
GO:1902495	transmembrane transporter complex	1.08e-10	1.4e-08	2.21	7301	82	2054	51	[Cng - cyclic-nucleotide-gated ion channel protein, Glu-RI - glutamate receptor i, scrib - scribbled, trpgamma - cg5996 gene product from transcript cg5996-rd, cac - cacophony, Mdr65 - multiple drug resistance 65, Grip - glutamate receptor b
GO:0044425	membrane part	3.53e-10	4.13e-08	1.25	7301	1341	2054	471	[inaE - inactivation no afterpotential e, CG8632 - cg8632 gene product from transcript cg8632-ra, Task6 - cg9637 gene product from transcript cg9637-rd, scrib - scribbled, trpgamma - cg5996 gene product from transcript cg5996-rd, CG5021 - cg50
GO:0070161	anchoring junction	4.24e-10	4.51e-08	2.33	7301	64	2054	42	[a - arc, p120ctn - adherens junction protein p120, scrib - scribbled, if - inflated, sdt - stardust, step - steppke, Abl - abl tyrosine kinase, bib - big brain, Pax - paxillin, baz - bazooka, ena - enabled, shot - short stop, Lap1
GO:0005912	adherens junction	4.24e-10	4.13e-08	2.33	7301	64	2054	42	[a - arc, p120ctn - adherens junction protein p120, scrib - scribbled, if - inflated, sdt - stardust, step - steppke, Abl - abl tyrosine kinase, bib - big brain, Pax - paxillin, baz - bazooka, ena - enabled, shot - short stop, Lap1
GO:1990351	transporter complex	6.91e-10	6.22e-08	2.13	7301	85	2054	51	[Cng - cyclic-nucleotide-gated ion channel protein, Glu-RI - glutamate receptor i, scrib - scribbled, trpgamma - cg5996 gene product from transcript cg5996-rd, cac - cacophony, Mdr65 - multiple drug resistance 65, Grip - glutamate receptor b
GO:0005938	cell cortex	1.19e-09	9.98e-08	2.06	7301	93	2054	54	[Dys - dystrophin, scrib - scribbled, Gef64C - guanine nucleotide exchange factor gef64c, sdt - stardust, tmod - tropomodulin, pbl - pebble, loco - locomotion defects, gcl - germ cell-less, Moe - moesin, spri - sprint, Rab7 - cg5915
GO:0099568	cytoplasmic region	1.66e-09	1.3e-07	2.04	7301	96	2054	55	[Dys - dystrophin, scrib - scribbled, Gef64C - guanine nucleotide exchange factor gef64c, sdt - stardust, tmod - tropomodulin, pbl - pebble, loco - locomotion defects, gcl - germ cell-less, Moe - moesin, spri - sprint, Rab7 - cg5915
GO:0098797	plasma membrane protein complex	2.69e-09	1.97e-07	1.89	7301	124	2054	66	[Hip1 - huntingtin interacting protein 1, Dys - dystrophin, scrib - scribbled, Glu-RI - glutamate receptor i, if - inflated, sdt - stardust, cac - cacophony, Mdr65 - multiple drug resistance 65, cta - concertina, Vha44 - vacuolar h[+]
GO:0098590	plasma membrane region	3.47e-09	2.39e-07	1.64	7301	225	2054	104	[inaE - inactivation no afterpotential e, scrib - scribbled, if - inflated, sdt - stardust, neuroligin - cg13772 gene product from transcript cg13772-rb, Rdl - resistant to dieldrin, rtet - tetracycline resistance, uif - uninflatable, CG10
GO:0034702	ion channel complex	6.56e-09	4.26e-07	2.2	7301	68	2054	42	[nompC - no mechanoreceptor potential c, wtrw - water witch, Cng - cyclic-nucleotide-gated ion channel protein, Glu-RI - glutamate receptor i, scrib - scribbled, Ca-beta - ca2+-channel-protein-beta-subunit, trpgamma - cg5996 gene product fro
GO:0044456	synapse part	1.29e-08	7.95e-07	1.8	7301	138	2054	70	[inaE - inactivation no afterpotential e, Syt1 - synaptotagmin 1, Ank2 - ankyrin 2, scrib - scribbled, X11Lbeta - cg32677 gene product from transcript cg32677-rb, cmpy - crimpy, cac - cacophony, bchs - blue cheese, Rpt6R - cg2241 gene pr
GO:0005911	cell-cell junction	2.23e-08	1.31e-06	2.13	7301	70	2054	42	[p120ctn - adherens junction protein p120, fw - furrowed, scrib - scribbled, sdt - stardust, ogre - optic ganglion reduced, CG14521 - cg14521 gene product from transcript cg14521-ra, step - steppke, Mdr65 - multiple drug resistance 65, cor
GO:0045202	synapse	2.52e-08	1.4e-06	1.91	7301	104	2054	56	[Dys - dystrophin, Syt1 - synaptotagmin 1, Ank2 - ankyrin 2, scrib - scribbled, X11Lbeta - cg32677 gene product from transcript cg32677-rb, cac - cacophony, bchs - blue cheese, Rab14 - cg4212 gene product from transcript cg4212-ra, neuroli
GO:0031224	intrinsic component of membrane	3.21e-08	1.71e-06	1.27	7301	966	2054	344	[CG8632 - cg8632 gene product from transcript cg8632-ra, Task6 - cg9637 gene product from transcript cg9637-rd, CG12355 - cg12355 gene product from transcript cg12355-rd, trpgamma - cg5996 gene product from transcript cg5996-rd, fz - frizzled, C
GO:0043005	neuron projection	7.36e-08	3.75e-06	1.63	7301	194	2054	89	[EcR - ecdysone receptor, 5-HT2 - serotonin receptor 2, Syt1 - synaptotagmin 1, Mmp2 - matrix metalloproteinase 2, X11Lbeta - cg32677 gene product from transcript cg32677-rb, Ptp69D - protein tyrosine phosphatase 69d, SK - small conductance
GO:0031594	neuromuscular junction	8.09e-08	3.94e-06	2.37	7301	45	2054	30	[rl - rolled, Syt1 - synaptotagmin 1, Ank2 - ankyrin 2, scrib - scribbled, pum - pumilio, cac - cacophony, bchs - blue cheese, dlg1 - discs large 1, neuroligin - cg13772 gene product from transcript cg13772-rb, dlp - dally-like, Fas2
GO:0016021	integral component of membrane	9.42e-08	4.41e-06	1.26	7301	952	2054	337	[CG8632 - cg8632 gene product from transcript cg8632-ra, Task6 - cg9637 gene product from transcript cg9637-rd, CG12355 - cg12355 gene product from transcript cg12355-rd, trpgamma - cg5996 gene product from transcript cg5996-rd, CG1358 - cg1358
GO:0033267	axon part	5.51e-07	2.48e-05	1.96	7301	76	2054	42	[Syt1 - synaptotagmin 1, Ank2 - ankyrin 2, prt - portabella, pum - pumilio, fusl - fuseless, gukh - guk-holder, cmpy - crimpy, dlg1 - discs large 1, gogo - golden goal, Ser - serrate, fra - frazzled, Fas2 - fasciclin 2, Grip - gl
GO:0120025	plasma membrane bounded cell projection	6.88e-07	2.98e-05	1.49	7301	265	2054	111	[5-HT2 - serotonin receptor 2, Mmp2 - matrix metalloproteinase 2, X11Lbeta - cg32677 gene product from transcript cg32677-rb, trpgamma - cg5996 gene product from transcript cg5996-rd, eys - eyes shut, CG6053 - cg6053 gene product from transcri
GO:0042995	cell projection	6.88e-07	2.87e-05	1.49	7301	265	2054	111	[5-HT2 - serotonin receptor 2, Mmp2 - matrix metalloproteinase 2, X11Lbeta - cg32677 gene product from transcript cg32677-rb, trpgamma - cg5996 gene product from transcript cg5996-rd, eys - eyes shut, CG6053 - cg6053 gene product from transcri
GO:0099738	cell cortex region	1.81e-06	7.31e-05	2.21	7301	45	2054	28	[brat - brain tumor, Fim - fimbrin, app - approximated, sdt - stardust, Gef64C - guanine nucleotide exchange factor gef64c, numb - cg3779 gene product from transcript cg3779-rb, step - steppke, dlg1 - discs large 1, Abl - abl tyrosine ki
GO:0030055	cell-substrate junction	2.47e-06	9.62e-05	2.6	7301	26	2054	19	[if - inflated, Lrt - leucine-rich tendon-specific protein, cno - canoe, Zyx - zyxin, CG1399 - cg1399 gene product from transcript cg1399-rf, slow - slowdown, Abl - abl tyrosine kinase, kug - kugelei, betaInt-nu - beta[nu] integrin, Pax
GO:0005924	cell-substrate adherens junction	2.47e-06	9.3e-05	2.6	7301	26	2054	19	[if - inflated, Lrt - leucine-rich tendon-specific protein, cno - canoe, Zyx - zyxin, CG1399 - cg1399 gene product from transcript cg1399-rf, slow - slowdown, Abl - abl tyrosine kinase, kug - kugelei, betaInt-nu - beta[nu] integrin, Pax
GO:0045179	apical cortex	2.97e-06	0.000108	2.28	7301	39	2054	25	[brat - brain tumor, Fim - fimbrin, app - approximated, sdt - stardust, Gef64C - guanine nucleotide exchange factor gef64c, dlg1 - discs large 1, Abl - abl tyrosine kinase, loco - locomotion defects, cher - cheerio, baz - bazooka, RhoG
GO:0034703	cation channel complex	7.47e-06	0.000265	2.13	7301	45	2054	27	[nompC - no mechanoreceptor potential c, wtrw - water witch, Cng - cyclic-nucleotide-gated ion channel protein, Glu-RI - glutamate receptor i, Ca-beta - ca2+-channel-protein-beta-subunit, Ca-alpha1T - ca[2+]-channel protein alpha[[1]] subunit
GO:0005856	cytoskeleton	7.87e-06	0.000271	2	7301	57	2054	32	[sn - singed, Dys - dystrophin, gukh - guk-holder, cora - coracle, Pax - paxillin, cher - cheerio, dnd - dead end, shot - short stop, CG1674 - cg1674 gene product from transcript cg1674-rb, CG34347 - cg34347 gene product from transcrip
GO:0044448	cell cortex part	8.41e-06	0.000281	1.91	7301	67	2054	36	[Hip1 - huntingtin interacting protein 1, brat - brain tumor, Fim - fimbrin, app - approximated, Gef64C - guanine nucleotide exchange factor gef64c, sdt - stardust, numb - cg3779 gene product from transcript cg3779-rb, step - steppke, dlg1
GO:0043195	terminal bouton	1.62e-05	0.000527	2.1	7301	44	2054	26	[Syt1 - synaptotagmin 1, Ank2 - ankyrin 2, prt - portabella, pum - pumilio, fusl - fuseless, gukh - guk-holder, cmpy - crimpy, dlg1 - discs large 1, Fas2 - fasciclin 2, Grip - glutamate receptor binding protein, Prosap - cg30483 gene
GO:0098595	perivitelline space	2.51e-05	0.000792	3.23	7301	11	2054	10	[kuz - kuzbanian, babos - cg3624 gene product from transcript cg3624-ra, CG32066 - cg32066 gene product from transcript cg32066-rb, fra - frazzled, dally - division abnormally delayed, dsx-c73A - doublesex cognate 73a, Cda4 - chitin deacetyl
GO:0005737	cytoplasm	4.23e-05	0.0013	1.18	7301	1058	2054	352	[inaE - inactivation no afterpotential e, Aats-glupro - glutamyl-prolyl-trna synthetase, grp - grapes, bmm - brummer, Galk - galactokinase, CG4839 - cg4839 gene product from transcript cg4839-ra, scrib - scribbled, CG12355 - cg12355 gene p
GO:0044449	contractile fiber part	4.24e-05	0.00127	2.2	7301	34	2054	21	[Mhcl - myosin heavy chain-like, sls - sallimus, CG3078 - cg3078 gene product from transcript cg3078-ra, bt - bent, Mf - myofilin, robo3 - cg5423 gene product from transcript cg5423-rb, Dg - dystroglycan, Msp-300 - muscle-specific protein
GO:0097060	synaptic membrane	6.27e-05	0.00183	1.96	7301	49	2054	27	[inaE - inactivation no afterpotential e, Ank2 - ankyrin 2, scrib - scribbled, gukh - guk-holder, fusl - fuseless, dlg1 - discs large 1, GluRIIE - glutamate receptor iie, neuroligin - cg13772 gene product from transcript cg13772-rb, Fas2
GO:0120038	plasma membrane bounded cell projection part	7.2e-05	0.00205	1.36	7301	301	2054	115	[5-HT2 - serotonin receptor 2, Mmp2 - matrix metalloproteinase 2, X11Lbeta - cg32677 gene product from transcript cg32677-rb, cmpy - crimpy, trpgamma - cg5996 gene product from transcript cg5996-rd, CG6053 - cg6053 gene product from transcript
GO:0044463	cell projection part	7.2e-05	0.00201	1.36	7301	301	2054	115	[5-HT2 - serotonin receptor 2, Mmp2 - matrix metalloproteinase 2, X11Lbeta - cg32677 gene product from transcript cg32677-rb, cmpy - crimpy, trpgamma - cg5996 gene product from transcript cg5996-rd, CG6053 - cg6053 gene product from transcript
GO:0045177	apical part of cell	7.32e-05	0.00199	2.03	7301	42	2054	24	[Traf4 - tnf-receptor-associated factor 4, wun2 - wunen-2, ru - roughoid, pot - papillote, CG13183 - cg13183 gene product from transcript cg13183-ra, CG13188 - cg13188 gene product from transcript cg13188-rb, CG1443 - cg1443 gene product fro
GO:0098793	presynapse	7.98e-05	0.00212	1.91	7301	52	2054	28	[prt - portabella, Syt1 - synaptotagmin 1, Ank2 - ankyrin 2, pum - pumilio, fusl - fuseless, gukh - guk-holder, cmpy - crimpy, dlg1 - discs large 1, tkv - thickveins, Fas2 - fasciclin 2, Grip - glutamate receptor binding protein, Pro
GO:0070938	contractile ring	8.15e-05	0.00212	3.2	7301	10	2054	9	[Fim - fimbrin, cher - cheerio, RhoGEF2 - cg9635 gene product from transcript cg9635-rf, Arpc2 - actin-related protein 2/3 complex, subunit 2, step - steppke, sti - sticky, Abl - abl tyrosine kinase, msn - misshapen, Spn - spinophilin]
GO:0045211	postsynaptic membrane	0.00017	0.00432	2.09	7301	34	2054	20	[inaE - inactivation no afterpotential e, Ten-m - tenascin major, scrib - scribbled, nAcRalpha-7E - nicotinic acetylcholine receptor alpha 7e, dlg1 - discs large 1, nAcRalpha-30D - nicotinic acetylcholine receptor alpha 30d, GluRIIE - glutam
GO:0016324	apical plasma membrane	0.000301	0.00748	1.85	7301	50	2054	26	[a - arc, Pde6 - phosphodiesterase 6, sdt - stardust, cac - cacophony, crb - crumbs, Ser - serrate, uif - uninflatable, baz - bazooka, CG11340 - cg11340 gene product from transcript cg11340-ra, RhoGEF2 - cg9635 gene product from transc
GO:0062023	collagen-containing extracellular matrix	0.000303	0.00737	2.43	7301	19	2054	13	[CG6232 - cg6232 gene product from transcript cg6232-ra, mp - multiplexin, vkg - viking, dlp - dally-like, wb - wing blister, dally - division abnormally delayed, Glt - glutactin, CG30046 - cg30046 gene product from transcript cg30046-rb,
GO:0005913	cell-cell adherens junction	0.000363	0.00866	2.73	7301	13	2054	10	[ex - expanded, p120ctn - adherens junction protein p120, baz - bazooka, scrib - scribbled, pyd - polychaetoid, cno - canoe, step - steppke, hbs - hibris, ed - echinoid, CadN2 - cadherin-n2]
GO:0005927	muscle tendon junction	0.000363	0.00849	2.73	7301	13	2054	10	[Pax - paxillin, Lrt - leucine-rich tendon-specific protein, Tsp - thrombospondin, chas - chascon, shot - short stop, CG1399 - cg1399 gene product from transcript cg1399-rf, slow - slowdown, kon - kon-tiki, Abl - abl tyrosine kinase, CG1
GO:0043235	receptor complex	0.000427	0.0098	1.72	7301	64	2054	31	[EcR - ecdysone receptor, drl - derailed, Egfr - epidermal growth factor receptor, if - inflated, Glu-RI - glutamate receptor i, scrib - scribbled, dlg1 - discs large 1, GluRIIE - glutamate receptor iie, tkv - thickveins, Grip - glutam
GO:0070160	tight junction	0.000485	0.0109	1.97	7301	36	2054	20	[sinu - sinuous, Shroom - cg34379 gene product from transcript cg34379-rd, scrib - scribbled, sdt - stardust, CG14521 - cg14521 gene product from transcript cg14521-ra, cora - coracle, Mdr65 - multiple drug resistance 65, Atpalpha - na pum
GO:0005829	cytosol	0.000632	0.0139	1.27	7301	369	2054	132	[Galk - galactokinase, grp - grapes, bmm - brummer, Cyt-c-d - cytochrome c distal, CG30392 - cg30392 gene product from transcript cg30392-ra, dnc - dunce, CG5001 - cg5001 gene product from transcript cg5001-rb, pix - pixie, Men - malic e
GO:0009986	cell surface	0.000663	0.0144	1.78	7301	52	2054	26	[Mco1 - multicopper oxidase-1, GNBP1 - gram-negative bacteria binding protein 1, eys - eyes shut, GNBP2 - gram-negative bacteria binding protein 2, Hsp83 - heat shock protein 83, neuroligin - cg13772 gene product from transcript cg13772-rb, Tl
GO:0030018	Z disc	0.000749	0.0159	2.37	7301	18	2054	12	[cher - cheerio, Msp-300 - muscle-specific protein 300, zormin - cg33484 gene product from transcript cg33484-rk, CG1674 - cg1674 gene product from transcript cg1674-rb, sls - sallimus, CG14207 - cg14207 gene product from transcript cg14207-rb
GO:0005918	septate junction	0.000758	0.0158	2	7301	32	2054	18	[sinu - sinuous, scrib - scribbled, sdt - stardust, CG14521 - cg14521 gene product from transcript cg14521-ra, Atpalpha - na pump alpha subunit, Mdr65 - multiple drug resistance 65, cora - coracle, dlg1 - discs large 1, CG14010 - cg14010
GO:0019897	extrinsic component of plasma membrane	0.000836	0.0172	3.11	7301	8	2054	7	[mbc - myoblast city, gcl - germ cell-less, Src64B - src oncogene at 64b, Fps85D - fps oncogene analog, trio - cg18214 gene product from transcript cg18214-ra, Abl - abl tyrosine kinase, klg - klingon]

## Sheet: GOFUNCTION
Table S3 Complete results from GOrilla GO term enrichment analysis of 6mA-containing genes
GO Term	P-value	Description	P-value	FDR q-value	Enrichment	N	B	n	b	Genes
GO:0005515	7.02e-18	protein binding	7.02e-18	1.64e-14	1.34	7301	1393	2054	524	[Task6 - cg9637 gene product from transcript cg9637-rd, scrib - scribbled, trpgamma - cg5996 gene product from transcript cg5996-rd, cmpy - crimpy, eys - eyes shut, pix - pixie, CG3493 - cg3493 gene product from transcript cg3493-ra, SMC1 -
GO:0005488	2.35e-17	binding	2.35e-17	2.74e-14	1.18	7301	3217	2054	1066	[CG10841 - cg10841 gene product from transcript cg10841-ra, Galk - galactokinase, scrib - scribbled, Task6 - cg9637 gene product from transcript cg9637-rd, CG13375 - cg13375 gene product from transcript cg13375-ra, pix - pixie, Cht5 - cg9307
GO:0043168	4.23e-09	anion binding	4.23e-09	3.29e-06	1.34	7301	690	2054	261	[Aats-glupro - glutamyl-prolyl-trna synthetase, Galk - galactokinase, grp - grapes, CG4839 - cg4839 gene product from transcript cg4839-ra, CG13375 - cg13375 gene product from transcript cg13375-ra, trpgamma - cg5996 gene product from transcri
GO:0005261	5.26e-09	cation channel activity	5.26e-09	3.07e-06	1.92	7301	113	2054	61	[Glu-RI - glutamate receptor i, Task6 - cg9637 gene product from transcript cg9637-rd, Cng - cyclic-nucleotide-gated ion channel protein, trpgamma - cg5996 gene product from transcript cg5996-rd, cac - cacophony, ppk20 - pickpocket 20, SK -
GO:0046873	7.6e-09	metal ion transmembrane transporter activity	7.6e-09	3.54e-06	1.79	7301	147	2054	74	[Task6 - cg9637 gene product from transcript cg9637-rd, Glu-RI - glutamate receptor i, trpgamma - cg5996 gene product from transcript cg5996-rd, cac - cacophony, ppk20 - pickpocket 20, SK - small conductance calcium-activated potassium channel
GO:0043167	8.36e-09	ion binding	8.36e-09	3.25e-06	1.23	7301	1305	2054	452	[CG10841 - cg10841 gene product from transcript cg10841-ra, Aats-glupro - glutamyl-prolyl-trna synthetase, Galk - galactokinase, grp - grapes, CG13375 - cg13375 gene product from transcript cg13375-ra, trpgamma - cg5996 gene product from trans
GO:0003700	1.65e-08	DNA-binding transcription factor activity	1.65e-08	5.5e-06	1.54	7301	281	2054	122	[rib - ribbon, pnr - pannier, bun - bunched, RunxA - cg34145 gene product from transcript cg34145-rb, CG9650 - cg9650 gene product from transcript cg9650-rg, CG7386 - cg7386 gene product from transcript cg7386-ra, ss - spineless, vnd - ven
GO:0005509	8.22e-08	calcium ion binding	8.22e-08	2.4e-05	1.74	7301	143	2054	70	[CG10841 - cg10841 gene product from transcript cg10841-ra, dp - dumpy, Syt1 - synaptotagmin 1, Frq1 - frequenin 1, cac - cacophony, eys - eyes shut, CalpB - calpain-b, Sytbeta - synaptotagmin beta, Syt7 - cg2381 gene product from transc
GO:1901363	1.32e-07	heterocyclic compound binding	1.32e-07	3.43e-05	1.19	7301	1552	2054	519	[Aats-glupro - glutamyl-prolyl-trna synthetase, grp - grapes, Galk - galactokinase, Cyt-c-d - cytochrome c distal, CG13375 - cg13375 gene product from transcript cg13375-ra, CG9940 - cg9940 gene product from transcript cg9940-rb, pix - pixie
GO:0008324	1.42e-07	cation transmembrane transporter activity	1.42e-07	3.3e-05	1.54	7301	244	2054	106	[CG8632 - cg8632 gene product from transcript cg8632-ra, Task6 - cg9637 gene product from transcript cg9637-rd, Glu-RI - glutamate receptor i, trpgamma - cg5996 gene product from transcript cg5996-rd, CG1688 - cg1688 gene product from transcript
GO:0022890	2e-07	inorganic cation transmembrane transporter activity	2e-07	4.24e-05	1.55	7301	234	2054	102	[Glu-RI - glutamate receptor i, Task6 - cg9637 gene product from transcript cg9637-rd, trpgamma - cg5996 gene product from transcript cg5996-rd, CG1688 - cg1688 gene product from transcript cg1688-ra, CG33988 - cg33988 gene product from transcri
GO:0097159	3.19e-07	organic cyclic compound binding	3.19e-07	6.2e-05	1.18	7301	1561	2054	519	[Aats-glupro - glutamyl-prolyl-trna synthetase, grp - grapes, Galk - galactokinase, Cyt-c-d - cytochrome c distal, CG13375 - cg13375 gene product from transcript cg13375-ra, CG9940 - cg9940 gene product from transcript cg9940-rb, pix - pixie
GO:0015079	5.67e-07	potassium ion transmembrane transporter activity	5.67e-07	0.000102	2.2	7301	50	2054	31	[Glu-RI - glutamate receptor i, Task6 - cg9637 gene product from transcript cg9637-rd, Atpalpha - na pump alpha subunit, SK - small conductance calcium-activated potassium channel, CG1688 - cg1688 gene product from transcript cg1688-ra, eag -
GO:0000981	5.86e-07	DNA-binding transcription factor activity, RNA polymerase II-specific	5.86e-07	9.77e-05	1.63	7301	168	2054	77	[EcR - ecdysone receptor, retn - retained, en - engrailed, svp - seven up, oc - ocelliless, pan - pangolin, pnr - pannier, tup - tailup, dar1 - dendritic arbor reduction 1, ss - spineless, vnd - ventral nervous system defective, CG70
GO:0060089	1.11e-06	molecular transducer activity	1.11e-06	0.000173	1.42	7301	344	2054	137	[CG31760 - cg31760 gene product from transcript cg31760-rc, 5-HT2 - serotonin receptor 2, CG4839 - cg4839 gene product from transcript cg4839-ra, Glu-RI - glutamate receptor i, GNBP1 - gram-negative bacteria binding protein 1, fz - frizzled, C
GO:0004672	1.12e-06	protein kinase activity	1.12e-06	0.000163	1.6	7301	173	2054	78	[grp - grapes, wee - cg4488 gene product from transcript cg4488-rb, CG4839 - cg4839 gene product from transcript cg4839-ra, gwl - greatwall, Atg1 - autophagy-specific gene 1, smi35A - smell impaired 35a, Eip63E - ecdysone-induced protein 63e
GO:0003779	1.12e-06	actin binding	1.12e-06	0.000154	1.91	7301	80	2054	43	[Hip1 - huntingtin interacting protein 1, d - dachs, sn - singed, Fim - fimbrin, Dys - dystrophin, cora - coracle, form3 - formin 3, qua - quail, tmod - tropomodulin, cher - cheerio, ena - enabled, CG32264 - cg32264 gene product fr
GO:0005267	1.85e-06	potassium channel activity	1.85e-06	0.00024	2.4	7301	34	2054	23	[Hk - hyperkinetic, Task6 - cg9637 gene product from transcript cg9637-rd, Glu-RI - glutamate receptor i, Shab - shaker cognate b, Ih - i[[h]] channel, SK - small conductance calcium-activated potassium channel, CG1688 - cg1688 gene product
GO:0140110	1.96e-06	transcription regulator activity	1.96e-06	0.00024	1.4	7301	350	2054	138	[rib - ribbon, pnr - pannier, bun - bunched, RunxA - cg34145 gene product from transcript cg34145-rb, CG9650 - cg9650 gene product from transcript cg9650-rg, CG7386 - cg7386 gene product from transcript cg7386-ra, Sin3A - cg8815 gene product
GO:0032553	3.11e-06	ribonucleotide binding	3.11e-06	0.000363	1.31	7301	534	2054	197	[Aats-glupro - glutamyl-prolyl-trna synthetase, grp - grapes, Galk - galactokinase, CG4839 - cg4839 gene product from transcript cg4839-ra, CG13375 - cg13375 gene product from transcript cg13375-ra, Rpt6R - cg2241 gene product from transcript
GO:0036094	4.76e-06	small molecule binding	4.76e-06	0.000528	1.26	7301	692	2054	246	[Aats-glupro - glutamyl-prolyl-trna synthetase, grp - grapes, Galk - galactokinase, CG4839 - cg4839 gene product from transcript cg4839-ra, CG13375 - cg13375 gene product from transcript cg13375-ra, trpgamma - cg5996 gene product from transcri
GO:0030594	6.34e-06	neurotransmitter receptor activity	6.34e-06	0.000672	1.99	7301	59	2054	33	[5-HT2 - serotonin receptor 2, Glu-RI - glutamate receptor i, CG42796 - cg42796 gene product from transcript cg42796-re, GluRIIE - glutamate receptor iie, 5-HT1A - serotonin receptor 1a, Rdl - resistant to dieldrin, TyrR - tyramine receptor,
GO:1901265	6.56e-06	nucleoside phosphate binding	6.56e-06	0.000665	1.28	7301	615	2054	221	[Aats-glupro - glutamyl-prolyl-trna synthetase, Galk - galactokinase, grp - grapes, CG4839 - cg4839 gene product from transcript cg4839-ra, CG13375 - cg13375 gene product from transcript cg13375-ra, Rpt6R - cg2241 gene product from transcript
GO:0000166	6.56e-06	nucleotide binding	6.56e-06	0.000637	1.28	7301	615	2054	221	[Aats-glupro - glutamyl-prolyl-trna synthetase, Galk - galactokinase, grp - grapes, CG4839 - cg4839 gene product from transcript cg4839-ra, CG13375 - cg13375 gene product from transcript cg13375-ra, Rpt6R - cg2241 gene product from transcript
GO:0032555	6.69e-06	purine ribonucleotide binding	6.69e-06	0.000624	1.3	7301	530	2054	194	[Aats-glupro - glutamyl-prolyl-trna synthetase, Galk - galactokinase, grp - grapes, CG4839 - cg4839 gene product from transcript cg4839-ra, CG13375 - cg13375 gene product from transcript cg13375-ra, Rpt6R - cg2241 gene product from transcript
GO:0015318	8.06e-06	inorganic molecular entity transmembrane transporter activity	8.06e-06	0.000723	1.37	7301	358	2054	138	[CG12531 - cg12531 gene product from transcript cg12531-ra, Task6 - cg9637 gene product from transcript cg9637-rd, Glu-RI - glutamate receptor i, trpgamma - cg5996 gene product from transcript cg5996-rd, CG1688 - cg1688 gene product from transcr
GO:0019904	9.04e-06	protein domain specific binding	9.04e-06	0.000781	2.15	7301	43	2054	26	[Pi3K68D - phosphotidylinositol 3 kinase 68d, Egfr - epidermal growth factor receptor, Dys - dystrophin, Sir2 - cg5216 gene product from transcript cg5216-ra, Nc - nedd2-like caspase, Hsp83 - heat shock protein 83, Tl - toll, pico - cg1194
GO:0097367	9.16e-06	carbohydrate derivative binding	9.16e-06	0.000763	1.26	7301	659	2054	234	[Aats-glupro - glutamyl-prolyl-trna synthetase, CG13643 - cg13643 gene product from transcript cg13643-re, Galk - galactokinase, grp - grapes, CG4839 - cg4839 gene product from transcript cg4839-ra, CG13375 - cg13375 gene product from transcri
GO:0038023	1.02e-05	signaling receptor activity	1.02e-05	0.000822	1.38	7301	326	2054	127	[CG31760 - cg31760 gene product from transcript cg31760-rc, 5-HT2 - serotonin receptor 2, Glu-RI - glutamate receptor i, GNBP1 - gram-negative bacteria binding protein 1, fz - frizzled, CG42796 - cg42796 gene product from transcript cg42796-re
GO:0015075	1.06e-05	ion transmembrane transporter activity	1.06e-05	0.00082	1.35	7301	381	2054	145	[CG8632 - cg8632 gene product from transcript cg8632-ra, CG12531 - cg12531 gene product from transcript cg12531-ra, Task6 - cg9637 gene product from transcript cg9637-rd, Glu-RI - glutamate receptor i, trpgamma - cg5996 gene product from transcr
GO:0017076	1.3e-05	purine nucleotide binding	1.3e-05	0.000978	1.29	7301	538	2054	195	[Aats-glupro - glutamyl-prolyl-trna synthetase, Galk - galactokinase, grp - grapes, CG4839 - cg4839 gene product from transcript cg4839-ra, CG13375 - cg13375 gene product from transcript cg13375-ra, Rpt6R - cg2241 gene product from transcript
GO:0022843	1.68e-05	voltage-gated cation channel activity	1.68e-05	0.00123	2.52	7301	24	2054	17	[Hk - hyperkinetic, Ca-alpha1D - ca[2+]-channel protein alpha[[1]] subunit d, CG42817 - cg42817 gene product from transcript cg42817-rb, Shab - shaker cognate b, Ih - i[[h]] channel, Ca-beta - ca2+-channel-protein-beta-subunit, cac - cacopho
GO:0035639	1.96e-05	purine ribonucleoside triphosphate binding	1.96e-05	0.00138	1.29	7301	519	2054	188	[Aats-glupro - glutamyl-prolyl-trna synthetase, Galk - galactokinase, grp - grapes, wee - cg4488 gene product from transcript cg4488-rb, sick - sickie, CG4839 - cg4839 gene product from transcript cg4839-ra, CG13375 - cg13375 gene product fr
GO:0032559	3.27e-05	adenyl ribonucleotide binding	3.27e-05	0.00224	1.31	7301	438	2054	161	[SNF4Agamma - snf4/amp-activated protein kinase gamma subunit, Aats-glupro - glutamyl-prolyl-trna synthetase, grp - grapes, Galk - galactokinase, sick - sickie, wee - cg4488 gene product from transcript cg4488-rb, CG4839 - cg4839 gene produc
GO:0050839	4.24e-05	cell adhesion molecule binding	4.24e-05	0.00283	2.2	7301	34	2054	21	[p120ctn - adherens junction protein p120, mun - munin, cno - canoe, CG5758 - cg5758 gene product from transcript cg5758-rc, stan - starry night, kug - kugelei, Ccn - cg32183 gene product from transcript cg32183-rb, betaInt-nu - beta[nu] i
GO:0030554	4.97e-05	adenyl nucleotide binding	4.97e-05	0.00322	1.3	7301	441	2054	161	[SNF4Agamma - snf4/amp-activated protein kinase gamma subunit, Aats-glupro - glutamyl-prolyl-trna synthetase, Galk - galactokinase, grp - grapes, wee - cg4488 gene product from transcript cg4488-rb, sick - sickie, CG4839 - cg4839 gene produc
GO:0022803	5.67e-05	passive transmembrane transporter activity	5.67e-05	0.00357	1.47	7301	186	2054	77	[Glu-RI - glutamate receptor i, Task6 - cg9637 gene product from transcript cg9637-rd, Cng - cyclic-nucleotide-gated ion channel protein, trpgamma - cg5996 gene product from transcript cg5996-rd, ppk20 - pickpocket 20, cac - cacophony, SK -
GO:0015267	5.67e-05	channel activity	5.67e-05	0.00348	1.47	7301	186	2054	77	[Task6 - cg9637 gene product from transcript cg9637-rd, Glu-RI - glutamate receptor i, Cng - cyclic-nucleotide-gated ion channel protein, trpgamma - cg5996 gene product from transcript cg5996-rd, ppk20 - pickpocket 20, cac - cacophony, SK -
GO:0008092	6.02e-05	cytoskeletal protein binding	6.02e-05	0.0036	1.45	7301	198	2054	81	[d - dachs, Hip1 - huntingtin interacting protein 1, Map205 - microtubule-associated protein 205, Dys - dystrophin, Ank2 - ankyrin 2, Patronin - cg33130 gene product from transcript cg33130-rn, tmod - tropomodulin, CG32232 - cg32232 gene p
GO:0001228	6.26e-05	DNA-binding transcription activator activity, RNA polymerase II-specific	6.26e-05	0.00365	1.87	7301	59	2054	31	[EcR - ecdysone receptor, retn - retained, Rel - relish, oc - ocelliless, Sir2 - cg5216 gene product from transcript cg5216-ra, dsx - doublesex, pan - pangolin, sim - single-minded, Pdp1 - par-domain protein 1, nau - nautilus, CHES-1-l
GO:0016301	6.59e-05	kinase activity	6.59e-05	0.00375	1.41	7301	237	2054	94	[Galk - galactokinase, grp - grapes, l(1)G0196 - lethal (1) g0196, Pi3K68D - phosphotidylinositol 3 kinase 68d, wee - cg4488 gene product from transcript cg4488-rb, gwl - greatwall, CG4839 - cg4839 gene product from transcript cg4839-ra, sdt
GO:0005524	7.03e-05	ATP binding	7.03e-05	0.0039	1.29	7301	431	2054	157	[Aats-glupro - glutamyl-prolyl-trna synthetase, Galk - galactokinase, grp - grapes, wee - cg4488 gene product from transcript cg4488-rb, sick - sickie, CG4839 - cg4839 gene product from transcript cg4839-ra, Mdr65 - multiple drug resistance
GO:0070851	0.000108	growth factor receptor binding	0.000108	0.00586	2.42	7301	22	2054	15	[grk - gurken, dlg1 - discs large 1, Pvf2 - pdgf- and vegf-related factor 2, Pvf3 - pdgf- and vegf-related factor 3, vn - vein, vap - vacuolar peduncle, CG32406 - cg32406 gene product from transcript cg32406-ra, ths - thisbe, spi - spitz
GO:0008144	0.000114	drug binding	0.000114	0.00604	1.25	7301	549	2054	193	[Aats-glupro - glutamyl-prolyl-trna synthetase, CG13643 - cg13643 gene product from transcript cg13643-re, Galk - galactokinase, grp - grapes, CG4839 - cg4839 gene product from transcript cg4839-ra, obst-B - obstructor-b, Rpt6R - cg2241 gene
GO:0022857	0.000131	transmembrane transporter activity	0.000131	0.00679	1.27	7301	480	2054	171	[CG8632 - cg8632 gene product from transcript cg8632-ra, CG12531 - cg12531 gene product from transcript cg12531-ra, Glu-RI - glutamate receptor i, Task6 - cg9637 gene product from transcript cg9637-rd, trpgamma - cg5996 gene product from transcr
GO:0016773	0.000138	phosphotransferase activity, alcohol group as acceptor	0.000138	0.00699	1.41	7301	220	2054	87	[Galk - galactokinase, grp - grapes, Pi3K68D - phosphotidylinositol 3 kinase 68d, wee - cg4488 gene product from transcript cg4488-rb, gwl - greatwall, CG4839 - cg4839 gene product from transcript cg4839-ra, Atg1 - autophagy-specific gene 1,
GO:0022838	0.000154	substrate-specific channel activity	0.000154	0.00765	1.45	7301	179	2054	73	[Task6 - cg9637 gene product from transcript cg9637-rd, Glu-RI - glutamate receptor i, Cng - cyclic-nucleotide-gated ion channel protein, trpgamma - cg5996 gene product from transcript cg5996-rd, ppk20 - pickpocket 20, cac - cacophony, SK -
GO:0015171	0.000157	amino acid transmembrane transporter activity	0.000157	0.00764	1.93	7301	46	2054	25	[CG12531 - cg12531 gene product from transcript cg12531-ra, CG13794 - cg13794 gene product from transcript cg13794-ra, CG13743 - cg13743 gene product from transcript cg13743-ra, dmGlut - dietary and metabolic glutamate transporter, Eaat2 - excit
GO:0005102	0.000177	signaling receptor binding	0.000177	0.00844	1.46	7301	165	2054	68	[scrib - scribbled, grk - gurken, fog - folded gastrulation, cta - concertina, neuroligin - cg13772 gene product from transcript cg13772-rb, pbl - pebble, Dh31 - diuretic hormone 31, ths - thisbe, Ser - serrate, uif - uninflatable, bnl
GO:0004888	0.000178	transmembrane signaling receptor activity	0.000178	0.00832	1.35	7301	276	2054	105	[CG31760 - cg31760 gene product from transcript cg31760-rc, 5-HT2 - serotonin receptor 2, Glu-RI - glutamate receptor i, CG42796 - cg42796 gene product from transcript cg42796-re, fz - frizzled, DmsR-2 - dromyosuppressin receptor 2, fra - fr
GO:0005216	0.000187	ion channel activity	0.000187	0.00856	1.45	7301	177	2054	72	[Glu-RI - glutamate receptor i, Task6 - cg9637 gene product from transcript cg9637-rd, Cng - cyclic-nucleotide-gated ion channel protein, trpgamma - cg5996 gene product from transcript cg5996-rd, ppk20 - pickpocket 20, cac - cacophony, SK -
GO:0046983	0.000345	protein dimerization activity	0.000345	0.0155	1.39	7301	207	2054	81	[EcR - ecdysone receptor, Syt1 - synaptotagmin 1, svp - seven up, Task6 - cg9637 gene product from transcript cg9637-rd, Gyc-89Db - guanylyl cyclase at 89db, if - inflated, Gyc-89Da - guanylyl cyclase at 89da, CG8965 - cg8965 gene product
GO:0042803	0.000353	protein homodimerization activity	0.000353	0.0155	1.58	7301	99	2054	44	[Khc-73 - kinesin-73, drl - derailed, Syt1 - synaptotagmin 1, svp - seven up, step - steppke, CG8965 - cg8965 gene product from transcript cg8965-ra, Gyc88E - guanylyl cyclase at 88e, oc - ocelliless, dsx - doublesex, Nc - nedd2-like c
GO:0005215	0.000353	transporter activity	0.000353	0.0153	1.23	7301	543	2054	188	[CG8632 - cg8632 gene product from transcript cg8632-ra, CG12531 - cg12531 gene product from transcript cg12531-ra, Glu-RI - glutamate receptor i, Task6 - cg9637 gene product from transcript cg9637-rd, CG30392 - cg30392 gene product from transcr
GO:0017147	0.000363	Wnt-protein binding	0.000363	0.0154	2.73	7301	13	2054	10	[drl - derailed, Swim - secreted wg-interacting molecule, fz4 - frizzled 4, CG13830 - cg13830 gene product from transcript cg13830-rd, arr - arrow, fz2 - frizzled 2, fz - frizzled, otk - off-track, dlp - dally-like, fz3 - frizzled 3]
GO:0015077	0.000398	monovalent inorganic cation transmembrane transporter activity	0.000398	0.0166	1.44	7301	163	2054	66	[Glu-RI - glutamate receptor i, Task6 - cg9637 gene product from transcript cg9637-rd, ppk20 - pickpocket 20, SK - small conductance calcium-activated potassium channel, CG10960 - cg10960 gene product from transcript cg10960-rc, CG1688 - cg168
GO:0004930	0.000439	G protein-coupled receptor activity	0.000439	0.018	1.58	7301	97	2054	43	[CG34411 - cg34411 gene product from transcript cg34411-rb, CG31760 - cg31760 gene product from transcript cg31760-rc, 5-HT2 - serotonin receptor 2, Dh31-R1 - diuretic hormone 31 receptor 1, SPR - sex peptide receptor, hec - hector, CG42796 -
GO:0004114	0.000493	3',5'-cyclic-nucleotide phosphodiesterase activity	0.000493	0.0198	3.55	7301	6	2054	6	[Pka-R1 - camp-dependent protein kinase r1, Pde6 - phosphodiesterase 6, Pde9 - phosphodiesterase 9, dnc - dunce, Pde11 - phosphodiesterase 11, Pka-R2 - camp-dependent protein kinase r2]
GO:0004112	0.000493	cyclic-nucleotide phosphodiesterase activity	0.000493	0.0195	3.55	7301	6	2054	6	[Pka-R1 - camp-dependent protein kinase r1, Pde6 - phosphodiesterase 6, Pde9 - phosphodiesterase 9, dnc - dunce, Pde11 - phosphodiesterase 11, Pka-R2 - camp-dependent protein kinase r2]
GO:0042813	0.000493	Wnt-activated receptor activity	0.000493	0.0192	3.55	7301	6	2054	6	[drl - derailed, fz4 - frizzled 4, fz2 - frizzled 2, arr - arrow, fz - frizzled, fz3 - frizzled 3]
GO:0004674	0.000518	protein serine/threonine kinase activity	0.000518	0.0198	1.48	7301	132	2054	55	[grp - grapes, gwl - greatwall, CG4839 - cg4839 gene product from transcript cg4839-ra, Atg1 - autophagy-specific gene 1, Eip63E - ecdysone-induced protein 63e, smi35A - smell impaired 35a, Nak - numb-associated kinase, CG32944 - cg32944 g
GO:0022832	0.000555	voltage-gated channel activity	0.000555	0.0209	2.08	7301	29	2054	17	[Hk - hyperkinetic, Ca-alpha1D - ca[2+]-channel protein alpha[[1]] subunit d, CG42817 - cg42817 gene product from transcript cg42817-rb, Shab - shaker cognate b, Ih - i[[h]] channel, Ca-beta - ca2+-channel-protein-beta-subunit, cac - cacopho
GO:0005244	0.000555	voltage-gated ion channel activity	0.000555	0.0205	2.08	7301	29	2054	17	[Hk - hyperkinetic, Ca-alpha1D - ca[2+]-channel protein alpha[[1]] subunit d, CG42817 - cg42817 gene product from transcript cg42817-rb, Shab - shaker cognate b, Ih - i[[h]] channel, Ca-beta - ca2+-channel-protein-beta-subunit, Ca-alpha1T -
GO:0042802	0.000646	identical protein binding	0.000646	0.0236	1.53	7301	107	2054	46	[Khc-73 - kinesin-73, drl - derailed, Syt1 - synaptotagmin 1, svp - seven up, step - steppke, CG8965 - cg8965 gene product from transcript cg8965-ra, Gyc88E - guanylyl cyclase at 88e, oc - ocelliless, dsx - doublesex, Nc - nedd2-like c
GO:0099528	0.000749	G protein-coupled neurotransmitter receptor activity	0.000749	0.0269	2.37	7301	18	2054	12	[5-HT1A - serotonin receptor 1a, 5-HT2 - serotonin receptor 2, CG43795 - cg43795 gene product from transcript cg43795-ra, TyrR - tyramine receptor, Oct-TyrR - octopamine-tyramine receptor, Octbeta2R - cg33976 gene product from transcript cg339
GO:0045182	0.000749	translation regulator activity	0.000749	0.0265	2.37	7301	18	2054	12	[brat - brain tumor, Gcn2 - cg1609 gene product from transcript cg1609-ra, msi - musashi, pum - pumilio, elav - embryonic lethal abnormal vision, CG13124 - cg13124 gene product from transcript cg13124-re, CG3011 - cg3011 gene product from tr
GO:0043565	0.000767	sequence-specific DNA binding	0.000767	0.0267	1.3	7301	295	2054	108	[pnr - pannier, CG34031 - cg34031 gene product from transcript cg34031-rc, Hers - histone gene-specific epigenetic repressor in late s phase, CG9650 - cg9650 gene product from transcript cg9650-rg, vnd - ventral nervous system defective, Abd-B
GO:0015081	0.000779	sodium ion transmembrane transporter activity	0.000779	0.0267	1.63	7301	74	2054	34	[CG13794 - cg13794 gene product from transcript cg13794-ra, prt - portabella, Glu-RI - glutamate receptor i, dmGlut - dietary and metabolic glutamate transporter, ppk20 - pickpocket 20, Eaat2 - excitatory amino acid transporter 2, Atpalpha -
GO:0008509	0.000931	anion transmembrane transporter activity	0.000931	0.0315	1.47	7301	123	2054	51	[CG12531 - cg12531 gene product from transcript cg12531-ra, NAAT1 - nutrient amino acid transporter 1, Rdl - resistant to dieldrin, GluClalpha - cg7535 gene product from transcript cg7535-rk, mnd - minidiscs, Oatp33Ea - organic anion transport
GO:0008528	0.00096	G protein-coupled peptide receptor activity	0.00096	0.032	1.87	7301	40	2054	21	[CG34411 - cg34411 gene product from transcript cg34411-rb, SPR - sex peptide receptor, Dh31-R1 - diuretic hormone 31 receptor 1, capaR - capa receptor, hec - hector, NepYr - neuropeptide y receptor-like, Lkr - leucokinin receptor, Pk1r -
GO:0005231	0.000987	excitatory extracellular ligand-gated ion channel activity	0.000987	0.0324	2.84	7301	10	2054	8	[GluClalpha - cg7535 gene product from transcript cg7535-rk, Grd - glycine receptor, gfA - giant fibre a, nAcRalpha-7E - nicotinic acetylcholine receptor alpha 7e, nAcRalpha-34E - nicotinic acetylcholine receptor alpha 34e, nAcRalpha-30D - nic

## Sheet: GOPROCESS
GO Term	P-value	Description	P-value	FDR q-value	Enrichment	N	B	n	b	Genes
GO:0065007	4.17e-49	biological regulation	4.17e-49	2.82e-45	1.38	7301	2583	2054	1000	[nemy - no extended memory, Task6 - cg9637 gene product from transcript cg9637-rd, scrib - scribbled, CG13375 - cg13375 gene product from transcript cg13375-ra, pix - pixie, CG9312 - cg9312 gene product from transcript cg9312-ra, fra - frazz
GO:0050789	1.97e-45	regulation of biological process	1.97e-45	6.67e-42	1.4	7301	2303	2054	904	[nemy - no extended memory, scrib - scribbled, CG13375 - cg13375 gene product from transcript cg13375-ra, pix - pixie, CG9312 - cg9312 gene product from transcript cg9312-ra, fra - frazzled, Rdl - resistant to dieldrin, ine - inebriated, e
GO:0050794	1.83e-43	regulation of cellular process	1.83e-43	4.12e-40	1.41	7301	2128	2054	844	[nemy - no extended memory, scrib - scribbled, CG13375 - cg13375 gene product from transcript cg13375-ra, pix - pixie, CG9312 - cg9312 gene product from transcript cg9312-ra, fra - frazzled, Rdl - resistant to dieldrin, elav - embryonic le
GO:0032502	3.24e-39	developmental process	3.24e-39	5.49e-36	1.53	7301	1368	2054	587	[inaE - inactivation no afterpotential e, grp - grapes, Cyt-c-d - cytochrome c distal, scrib - scribbled, eys - eyes shut, CG13597 - cg13597 gene product from transcript cg13597-ra, SMC1 - cg6057 gene product from transcript cg6057-ra, Cht5
GO:0009653	5.55e-37	anatomical structure morphogenesis	5.55e-37	7.51e-34	1.86	7301	567	2054	297	[scrib - scribbled, Mdh2 - malate dehydrogenase 2, eys - eyes shut, fz - frizzled, dlp - dally-like, SMC1 - cg6057 gene product from transcript cg6057-ra, fra - frazzled, dib - disembodied, svr - silver, Appl - beta amyloid protein pre
GO:0048856	3.47e-30	anatomical structure development	3.47e-30	3.91e-27	1.58	7301	927	2054	412	[grp - grapes, scrib - scribbled, SMC1 - cg6057 gene product from transcript cg6057-ra, Cht5 - cg9307 gene product from transcript cg9307-ra, Pka-R1 - camp-dependent protein kinase r1, fra - frazzled, elav - embryonic lethal abnormal vision,
GO:0006928	3.2e-27	movement of cell or subcellular component	3.2e-27	3.09e-24	1.83	7301	451	2054	232	[fz - frizzled, dlp - dally-like, chif - chiffon, fra - frazzled, Sin3A - cg8815 gene product from transcript cg8815-rc, Abd-B - abdominal b, Rab7 - cg5915 gene product from transcript cg5915-ra, Dscam - down syndrome cell adhesion molecul
GO:0051239	1.5e-25	regulation of multicellular organismal process	1.5e-25	1.27e-22	1.75	7301	511	2054	251	[grp - grapes, Cyt-c-d - cytochrome c distal, scrib - scribbled, fz - frizzled, dlp - dally-like, Rdl - resistant to dieldrin, fra - frazzled, Amph - amphiphysin, Sin3A - cg8815 gene product from transcript cg8815-rc, CG15537 - cg15537
GO:0007411	1.66e-25	axon guidance	1.66e-25	1.25e-22	2.34	7301	173	2054	114	[if - inflated, Mmp2 - matrix metalloproteinase 2, CdGAPr - cg10538 gene product from transcript cg10538-rd, dlp - dally-like, robo3 - cg5423 gene product from transcript cg5423-rb, chif - chiffon, fra - frazzled, ckn - caskin, trio - cg
GO:0009987	2.14e-25	cellular process	2.14e-25	1.45e-22	1.18	7301	3900	2054	1295	[Galk - galactokinase, CG42708 - cg42708 gene product from transcript cg42708-ra, Task6 - cg9637 gene product from transcript cg9637-rd, scrib - scribbled, CG8771 - cg8771 gene product from transcript cg8771-rb, CG13375 - cg13375 gene product
GO:0097485	2.31e-24	neuron projection guidance	2.31e-24	1.42e-21	2.28	7301	181	2054	116	[if - inflated, Mmp2 - matrix metalloproteinase 2, CdGAPr - cg10538 gene product from transcript cg10538-rd, dlp - dally-like, robo3 - cg5423 gene product from transcript cg5423-rb, chif - chiffon, fra - frazzled, ckn - caskin, trio - cg
GO:0065008	2.3e-23	regulation of biological quality	2.3e-23	1.3e-20	1.57	7301	752	2054	332	[inaE - inactivation no afterpotential e, bmm - brummer, nemy - no extended memory, scrib - scribbled, Task6 - cg9637 gene product from transcript cg9637-rd, trpgamma - cg5996 gene product from transcript cg5996-rd, fz - frizzled, tmod - t
GO:0048869	3.29e-23	cellular developmental process	3.29e-23	1.71e-20	1.61	7301	665	2054	301	[inaE - inactivation no afterpotential e, scrib - scribbled, Mdh2 - malate dehydrogenase 2, eys - eyes shut, fz - frizzled, CG13597 - cg13597 gene product from transcript cg13597-ra, SMC1 - cg6057 gene product from transcript cg6057-ra, Atg5
GO:0050793	4.87e-23	regulation of developmental process	4.87e-23	2.35e-20	1.73	7301	484	2054	235	[grp - grapes, Cyt-c-d - cytochrome c distal, scrib - scribbled, fz - frizzled, dlp - dally-like, pico - cg11940 gene product from transcript cg11940-rb, fra - frazzled, Sin3A - cg8815 gene product from transcript cg8815-rc, Abd-B - abdo
GO:0009886	8.03e-22	post-embryonic animal morphogenesis	8.03e-22	3.63e-19	2.05	7301	232	2054	134	[sfl - sulfateless, scrib - scribbled, Mmp2 - matrix metalloproteinase 2, if - inflated, Mdh2 - malate dehydrogenase 2, fz - frizzled, MYPT-75D - cg6896 gene product from transcript cg6896-rb, Mmp1 - matrix metalloproteinase 1, dlp - dal
GO:0048518	1.47e-20	positive regulation of biological process	1.47e-20	6.23e-18	1.47	7301	930	2054	384	[bmm - brummer, Cyt-c-d - cytochrome c distal, Mdh2 - malate dehydrogenase 2, lap - like-ap180, fz - frizzled, Rpt6R - cg2241 gene product from transcript cg2241-ra, Pli - pellino, dlp - dally-like, pico - cg11940 gene product from trans
GO:0040011	3.08e-20	locomotion	3.08e-20	1.22e-17	1.91	7301	281	2054	151	[sfl - sulfateless, ru - roughoid, Pi3K68D - phosphotidylinositol 3 kinase 68d, rib - ribbon, if - inflated, Mmp2 - matrix metalloproteinase 2, lap - like-ap180, CG34353 - cg34353 gene product from transcript cg34353-rb, Hdc - histidine
GO:0048523	6.4e-20	negative regulation of cellular process	6.4e-20	2.41e-17	1.52	7301	750	2054	321	[grp - grapes, scrib - scribbled, cmpy - crimpy, Patronin - cg33130 gene product from transcript cg33130-rn, fz - frizzled, Pli - pellino, pix - pixie, tmod - tropomodulin, SoYb - sister of yb, Rdl - resistant to dieldrin, Hers - his
GO:0032879	1.19e-19	regulation of localization	1.19e-19	4.23e-17	1.89	7301	284	2054	151	[bmm - brummer, ru - roughoid, nemy - no extended memory, scrib - scribbled, cmpy - crimpy, lap - like-ap180, fz - frizzled, Sytbeta - synaptotagmin beta, fra - frazzled, CaBP1 - calcium-binding protein 1, CG9650 - cg9650 gene produc
GO:2000026	2.27e-19	regulation of multicellular organismal development	2.27e-19	7.68e-17	1.75	7301	379	2054	187	[sfl - sulfateless, grp - grapes, Cyt-c-d - cytochrome c distal, scrib - scribbled, fz - frizzled, dlp - dally-like, raw - cg12437 gene product from transcript cg12437-rb, fra - frazzled, bun - bunched, ss - spineless, Abd-B - abdomi
GO:0007165	2.74e-19	signal transduction	2.74e-19	8.82e-17	1.55	7301	660	2054	288	[inaE - inactivation no afterpotential e, grp - grapes, CG13375 - cg13375 gene product from transcript cg13375-ra, CG42796 - cg42796 gene product from transcript cg42796-re, fz - frizzled, Pli - pellino, dlp - dally-like, DmsR-2 - dromyosu
GO:0048519	6.53e-19	negative regulation of biological process	6.53e-19	2.01e-16	1.47	7301	854	2054	353	[grp - grapes, bmm - brummer, scrib - scribbled, cmpy - crimpy, Patronin - cg33130 gene product from transcript cg33130-rn, fz - frizzled, Pli - pellino, tmod - tropomodulin, pix - pixie, SoYb - sister of yb, SMC1 - cg6057 gene produ
GO:0010646	1.71e-18	regulation of cell communication	1.71e-18	5.03e-16	1.6	7301	547	2054	246	[nemy - no extended memory, scrib - scribbled, cmpy - crimpy, fz - frizzled, Rpt6R - cg2241 gene product from transcript cg2241-ra, Pli - pellino, dlp - dally-like, Rdl - resistant to dieldrin, CG9650 - cg9650 gene product from transcrip
GO:0023051	1.71e-18	regulation of signaling	1.71e-18	4.82e-16	1.6	7301	547	2054	246	[nemy - no extended memory, scrib - scribbled, cmpy - crimpy, fz - frizzled, Rpt6R - cg2241 gene product from transcript cg2241-ra, Pli - pellino, dlp - dally-like, Rdl - resistant to dieldrin, CG9650 - cg9650 gene product from transcrip
GO:0009887	1.03e-17	animal organ morphogenesis	1.03e-17	2.78e-15	1.99	7301	209	2054	117	[ru - roughoid, rib - ribbon, scrib - scribbled, if - inflated, Mdh2 - malate dehydrogenase 2, fz - frizzled, raw - cg12437 gene product from transcript cg12437-rb, pnr - pannier, mthl1 - methuselah-like 1, CG13366 - cg13366 gene produ
GO:0048513	1.34e-17	animal organ development	1.34e-17	3.5e-15	1.68	7301	415	2054	196	[grp - grapes, scrib - scribbled, fz - frizzled, dlp - dally-like, pico - cg11940 gene product from transcript cg11940-rb, Pka-R1 - camp-dependent protein kinase r1, fra - frazzled, cact - cactus, Sin3A - cg8815 gene product from transcr
GO:0016477	5.88e-17	cell migration	5.88e-17	1.48e-14	2.01	7301	193	2054	109	[sfl - sulfateless, ru - roughoid, Pi3K68D - phosphotidylinositol 3 kinase 68d, rib - ribbon, if - inflated, Mmp2 - matrix metalloproteinase 2, fz - frizzled, dlp - dally-like, fra - frazzled, bun - bunched, mthl1 - methuselah-like 1
GO:0048522	1.99e-16	positive regulation of cellular process	1.99e-16	4.81e-14	1.44	7301	826	2054	335	[Cyt-c-d - cytochrome c distal, Mdh2 - malate dehydrogenase 2, lap - like-ap180, fz - frizzled, Rpt6R - cg2241 gene product from transcript cg2241-ra, Pli - pellino, dlp - dally-like, pico - cg11940 gene product from transcript cg11940-rb,
GO:0009888	2.24e-16	tissue development	2.24e-16	5.22e-14	1.96	7301	203	2054	112	[grp - grapes, scrib - scribbled, Mmp2 - matrix metalloproteinase 2, Mmp1 - matrix metalloproteinase 1, wb - wing blister, pnr - pannier, bib - big brain, pico - cg11940 gene product from transcript cg11940-rb, bun - bunched, mthl1 - m
GO:0016043	1.11e-15	cellular component organization	1.11e-15	2.51e-13	1.32	7301	1350	2054	501	[grp - grapes, scrib - scribbled, CG8771 - cg8771 gene product from transcript cg8771-rb, cmpy - crimpy, eys - eyes shut, pix - pixie, CG15630 - cg15630 gene product from transcript cg15630-ra, SMC1 - cg6057 gene product from transcript cg
GO:0071840	1.94e-15	cellular component organization or biogenesis	1.94e-15	4.24e-13	1.31	7301	1363	2054	504	[grp - grapes, scrib - scribbled, CG8771 - cg8771 gene product from transcript cg8771-rb, cmpy - crimpy, eys - eyes shut, pix - pixie, CG15630 - cg15630 gene product from transcript cg15630-ra, SMC1 - cg6057 gene product from transcript cg
GO:0008045	2.13e-15	motor neuron axon guidance	2.13e-15	4.52e-13	2.77	7301	59	2054	46	[beat-VI - cg14064 gene product from transcript cg14064-rb, beat-IIa - beaten path iia, Mmp2 - matrix metalloproteinase 2, beat-IIb - cg4135 gene product from transcript cg4135-rb, Ptp69D - protein tyrosine phosphatase 69d, Abl - abl tyrosine
GO:0051128	2.96e-15	regulation of cellular component organization	2.96e-15	6.07e-13	1.58	7301	469	2054	209	[scrib - scribbled, cmpy - crimpy, Patronin - cg33130 gene product from transcript cg33130-rn, lap - like-ap180, fz - frizzled, Rpt6R - cg2241 gene product from transcript cg2241-ra, pix - pixie, tmod - tropomodulin, fra - frazzled, CaBP
GO:0045595	4.08e-15	regulation of cell differentiation	4.08e-15	8.12e-13	1.78	7301	276	2054	138	[Cyt-c-d - cytochrome c distal, CG9634 - cg9634 gene product from transcript cg9634-ra, fz - frizzled, SMC2 - cg10212 gene product from transcript cg10212-ra, CG31033 - cg31033 gene product from transcript cg31033-rc, fra - frazzled, bun - b
GO:0048870	4.63e-15	cell motility	4.63e-15	8.95e-13	1.91	7301	207	2054	111	[sfl - sulfateless, ru - roughoid, Pi3K68D - phosphotidylinositol 3 kinase 68d, rib - ribbon, if - inflated, Mmp2 - matrix metalloproteinase 2, fz - frizzled, dlp - dally-like, fra - frazzled, bun - bunched, mthl1 - methuselah-like 1
GO:0007154	7.24e-15	cell communication	7.24e-15	1.36e-12	1.9	7301	208	2054	111	[inaE - inactivation no afterpotential e, SNF4Agamma - snf4/amp-activated protein kinase gamma subunit, 5-HT2 - serotonin receptor 2, Mmp2 - matrix metalloproteinase 2, X11Lbeta - cg32677 gene product from transcript cg32677-rb, lap - like-ap1
GO:0048729	9.36e-15	tissue morphogenesis	9.36e-15	1.71e-12	2	7301	169	2054	95	[EcR - ecdysone receptor, rib - ribbon, en - engrailed, scrib - scribbled, sdt - stardust, fog - folded gastrulation, cta - concertina, bab1 - bric a brac 1, fz - frizzled, raw - cg12437 gene product from transcript cg12437-rb, pbl -
GO:0048583	1.24e-14	regulation of response to stimulus	1.24e-14	2.22e-12	1.49	7301	610	2054	256	[scrib - scribbled, cmpy - crimpy, fz - frizzled, Pli - pellino, dlp - dally-like, Sytbeta - synaptotagmin beta, Rdl - resistant to dieldrin, ine - inebriated, cact - cactus, Sin3A - cg8815 gene product from transcript cg8815-rc, CG485
GO:0002009	1.44e-14	morphogenesis of an epithelium	1.44e-14	2.5e-12	2	7301	165	2054	93	[EcR - ecdysone receptor, rib - ribbon, en - engrailed, scrib - scribbled, sdt - stardust, fog - folded gastrulation, fz - frizzled, bab1 - bric a brac 1, cta - concertina, raw - cg12437 gene product from transcript cg12437-rb, pbl -
GO:0008038	1.95e-14	neuron recognition	1.95e-14	3.3e-12	2.51	7301	75	2054	53	[Mmp2 - matrix metalloproteinase 2, if - inflated, pot - papillote, Ptp69D - protein tyrosine phosphatase 69d, bchs - blue cheese, wdp - windpipe, Mmp1 - matrix metalloproteinase 1, robo3 - cg5423 gene product from transcript cg5423-rb, pb
GO:0048731	2.24e-14	system development	2.24e-14	3.7e-12	1.93	7301	188	2054	102	[sick - sickie, rib - ribbon, Mmp2 - matrix metalloproteinase 2, Mmp1 - matrix metalloproteinase 1, raw - cg12437 gene product from transcript cg12437-rb, bib - big brain, dib - disembodied, elav - embryonic lethal abnormal vision, cact -
GO:0035107	3.26e-14	appendage morphogenesis	3.26e-14	5.25e-12	2.19	7301	117	2054	72	[Gap1 - gtpase-activating protein 1, EcR - ecdysone receptor, mam - mastermind, fw - furrowed, if - inflated, Gef64C - guanine nucleotide exchange factor gef64c, GEFmeso - guanine nucleotide exchange factor in mesoderm, dve - defective pro
GO:0007155	4.37e-14	cell adhesion	4.37e-14	6.88e-12	2.12	7301	129	2054	77	[EcR - ecdysone receptor, p120ctn - adherens junction protein p120, fw - furrowed, scrib - scribbled, if - inflated, Swim - secreted wg-interacting molecule, fz - frizzled, Mmp1 - matrix metalloproteinase 1, neuroligin - cg13772 gene pro
GO:0008037	4.39e-14	cell recognition	4.39e-14	6.75e-12	2.46	7301	78	2054	54	[Mmp2 - matrix metalloproteinase 2, if - inflated, pot - papillote, Ptp69D - protein tyrosine phosphatase 69d, bchs - blue cheese, wdp - windpipe, Mmp1 - matrix metalloproteinase 1, robo3 - cg5423 gene product from transcript cg5423-rb, pb
GO:0035120	4.6e-14	post-embryonic appendage morphogenesis	4.6e-14	6.92e-12	2.26	7301	104	2054	66	[Gap1 - gtpase-activating protein 1, EcR - ecdysone receptor, mam - mastermind, fw - furrowed, if - inflated, Gef64C - guanine nucleotide exchange factor gef64c, GEFmeso - guanine nucleotide exchange factor in mesoderm, dve - defective pro
GO:0035114	1.24e-13	imaginal disc-derived appendage morphogenesis	1.24e-13	1.82e-11	2.2	7301	110	2054	68	[Gap1 - gtpase-activating protein 1, EcR - ecdysone receptor, mam - mastermind, fw - furrowed, if - inflated, Gef64C - guanine nucleotide exchange factor gef64c, GEFmeso - guanine nucleotide exchange factor in mesoderm, dve - defective pro
GO:0022610	1.38e-13	biological adhesion	1.38e-13	1.99e-11	2.09	7301	131	2054	77	[EcR - ecdysone receptor, p120ctn - adherens junction protein p120, fw - furrowed, if - inflated, scrib - scribbled, Swim - secreted wg-interacting molecule, fz - frizzled, Mmp1 - matrix metalloproteinase 1, neuroligin - cg13772 gene pro
GO:0001667	1.63e-13	ameboidal-type cell migration	1.63e-13	2.29e-11	2.16	7301	115	2054	70	[sfl - sulfateless, EcR - ecdysone receptor, ru - roughoid, rib - ribbon, sr - stripe, if - inflated, grk - gurken, fz - frizzled, fog - folded gastrulation, dlp - dally-like, CalpB - calpain-b, pbl - pebble, ths - thisbe, bun -
GO:0007267	1.65e-13	cell-cell signaling	1.65e-13	2.28e-11	2.02	7301	148	2054	84	[inaE - inactivation no afterpotential e, 5-HT2 - serotonin receptor 2, sr - stripe, Dys - dystrophin, Syt1 - synaptotagmin 1, Mmp2 - matrix metalloproteinase 2, svp - seven up, X11Lbeta - cg32677 gene product from transcript cg32677-rb, F
GO:0060284	1.8e-13	regulation of cell development	1.8e-13	2.44e-11	1.84	7301	213	2054	110	[Cyt-c-d - cytochrome c distal, fz - frizzled, fra - frazzled, bun - bunched, ss - spineless, trio - cg18214 gene product from transcript cg18214-ra, W - wrinkled, spri - sprint, N - notch, Dscam - down syndrome cell adhesion molecule,
GO:0032501	2.29e-13	multicellular organismal process	2.29e-13	3.04e-11	1.31	7301	1218	2054	449	[grp - grapes, nemy - no extended memory, scrib - scribbled, trpgamma - cg5996 gene product from transcript cg5996-rd, CG42663 - cg42663 gene product from transcript cg42663-rb, CG5644 - cg5644 gene product from transcript cg5644-ra, Cht5 -
GO:0048468	2.74e-13	cell development	2.74e-13	3.56e-11	1.68	7301	304	2054	144	[scrib - scribbled, sdt - stardust, CG9634 - cg9634 gene product from transcript cg9634-ra, egg - eggless, Mdr65 - multiple drug resistance 65, bib - big brain, bun - bunched, neb - nebbish, elav - embryonic lethal abnormal vision, cact
GO:0007476	2.74e-13	imaginal disc-derived wing morphogenesis	2.74e-13	3.5e-11	2.43	7301	76	2054	52	[EcR - ecdysone receptor, Gap1 - gtpase-activating protein 1, mam - mastermind, fw - furrowed, if - inflated, fog - folded gastrulation, dve - defective proventriculus, MYPT-75D - cg6896 gene product from transcript cg6896-rb, pan - pang
GO:0023052	2.96e-13	signaling	2.96e-13	3.71e-11	1.98	7301	154	2054	86	[inaE - inactivation no afterpotential e, 5-HT2 - serotonin receptor 2, sr - stripe, Dys - dystrophin, Syt1 - synaptotagmin 1, Mmp2 - matrix metalloproteinase 2, svp - seven up, X11Lbeta - cg32677 gene product from transcript cg32677-rb, F
GO:0035556	3.99e-13	intracellular signal transduction	3.99e-13	4.91e-11	1.77	7301	241	2054	120	[grp - grapes, Pi3K68D - phosphotidylinositol 3 kinase 68d, Gyc-89Db - guanylyl cyclase at 89db, Gyc-89Da - guanylyl cyclase at 89da, CdGAPr - cg10538 gene product from transcript cg10538-rd, dnc - dunce, Pka-R1 - camp-dependent protein kina
GO:0032989	4.08e-13	cellular component morphogenesis	4.08e-13	4.93e-11	1.87	7301	192	2054	101	[sick - sickie, scrib - scribbled, if - inflated, eys - eyes shut, raw - cg12437 gene product from transcript cg12437-rb, SMC1 - cg6057 gene product from transcript cg6057-ra, fra - frazzled, RunxA - cg34145 gene product from transcript cg
GO:0098609	4.41e-13	cell-cell adhesion	4.41e-13	5.23e-11	2.36	7301	83	2054	55	[p120ctn - adherens junction protein p120, fw - furrowed, scrib - scribbled, if - inflated, fz - frizzled, neuroligin - cg13772 gene product from transcript cg13772-rb, bib - big brain, Grip - glutamate receptor binding protein, kirre -
GO:0023057	6.53e-13	negative regulation of signaling	6.53e-13	7.63e-11	1.79	7301	224	2054	113	[Pi3K68D - phosphotidylinositol 3 kinase 68d, Mmp2 - matrix metalloproteinase 2, cmpy - crimpy, fz - frizzled, dnc - dunce, Pli - pellino, neuroligin - cg13772 gene product from transcript cg13772-rb, raw - cg12437 gene product from transc
GO:0048598	7.99e-13	embryonic morphogenesis	7.99e-13	9.17e-11	2.1	7301	120	2054	71	[EcR - ecdysone receptor, 5-HT2 - serotonin receptor 2, p120ctn - adherens junction protein p120, rib - ribbon, sr - stripe, scrib - scribbled, fog - folded gastrulation, cta - concertina, Nc - nedd2-like caspase, raw - cg12437 gene pr
GO:0007610	1.02e-12	behavior	1.02e-12	1.15e-10	1.59	7301	383	2054	171	[nemy - no extended memory, scrib - scribbled, trpgamma - cg5996 gene product from transcript cg5996-rd, dnc - dunce, DmsR-2 - dromyosuppressin receptor 2, neuroligin - cg13772 gene product from transcript cg13772-rb, CG33988 - cg33988 gene
GO:0010648	1.21e-12	negative regulation of cell communication	1.21e-12	1.34e-10	1.79	7301	223	2054	112	[Pi3K68D - phosphotidylinositol 3 kinase 68d, Mmp2 - matrix metalloproteinase 2, cmpy - crimpy, fz - frizzled, dnc - dunce, Pli - pellino, neuroligin - cg13772 gene product from transcript cg13772-rb, raw - cg12437 gene product from transc
GO:0007389	1.26e-12	pattern specification process	1.26e-12	1.37e-10	1.68	7301	287	2054	136	[sfl - sulfateless, ru - roughoid, scrib - scribbled, clos - closca, fz - frizzled, dlp - dally-like, pnr - pannier, fra - frazzled, CG5890 - cg5890 gene product from transcript cg5890-rb, cact - cactus, ss - spineless, vnd - ventr
GO:0051049	1.3e-12	regulation of transport	1.3e-12	1.4e-10	1.93	7301	162	2054	88	[Hip1 - huntingtin interacting protein 1, ru - roughoid, nemy - no extended memory, Dys - dystrophin, Syt1 - synaptotagmin 1, scrib - scribbled, Frq1 - frequenin 1, cmpy - crimpy, cac - cacophony, lap - like-ap180, wdp - windpipe, Gl
GO:0051960	2.94e-12	regulation of nervous system development	2.94e-12	3.1e-10	1.76	7301	228	2054	113	[fz - frizzled, fra - frazzled, bun - bunched, ss - spineless, trio - cg18214 gene product from transcript cg18214-ra, Mob2 - cg11711 gene product from transcript cg11711-ra, N - notch, Dscam - down syndrome cell adhesion molecule, pk -
GO:0022603	5.09e-12	regulation of anatomical structure morphogenesis	5.09e-12	5.3e-10	1.91	7301	160	2054	86	[Gap1 - gtpase-activating protein 1, Cyt-c-d - cytochrome c distal, rib - ribbon, tinc - tincar, oc - ocelliless, nudC - cg9710 gene product from transcript cg9710-rb, fz - frizzled, cta - concertina, fog - folded gastrulation, Nc - ne
GO:0099177	9.02e-12	regulation of trans-synaptic signaling	9.02e-12	9.25e-10	2.26	7301	85	2054	54	[Ank2 - ankyrin 2, Syt1 - synaptotagmin 1, nemy - no extended memory, Dys - dystrophin, Frq1 - frequenin 1, cac - cacophony, Rpt6R - cg2241 gene product from transcript cg2241-ra, Atg1 - autophagy-specific gene 1, neuroligin - cg13772 ge
GO:0050804	9.02e-12	modulation of chemical synaptic transmission	9.02e-12	9.11e-10	2.26	7301	85	2054	54	[Ank2 - ankyrin 2, Syt1 - synaptotagmin 1, nemy - no extended memory, Dys - dystrophin, Frq1 - frequenin 1, cac - cacophony, Rpt6R - cg2241 gene product from transcript cg2241-ra, Atg1 - autophagy-specific gene 1, neuroligin - cg13772 ge
GO:0009966	9.81e-12	regulation of signal transduction	9.81e-12	9.77e-10	1.5	7301	475	2054	200	[scrib - scribbled, cmpy - crimpy, fz - frizzled, Pli - pellino, dlp - dally-like, Sin3A - cg8815 gene product from transcript cg8815-rc, CG4853 - cg4853 gene product from transcript cg4853-ra, CG15537 - cg15537 gene product from transcrip
GO:0030029	1.1e-11	actin filament-based process	1.1e-11	1.07e-09	2.04	7301	120	2054	69	[Pi3K68D - phosphotidylinositol 3 kinase 68d, if - inflated, cta - concertina, fog - folded gastrulation, pbl - pebble, loco - locomotion defects, CG32264 - cg32264 gene product from transcript cg32264-rk, shot - short stop, mthl1 - meth
GO:0030030	1.18e-11	cell projection organization	1.18e-11	1.14e-09	1.76	7301	216	2054	107	[sick - sickie, Mmp2 - matrix metalloproteinase 2, Patronin - cg33130 gene product from transcript cg33130-rn, CG42388 - cg42388 gene product from transcript cg42388-rc, fz - frizzled, Mmp1 - matrix metalloproteinase 1, SMC1 - cg6057 gene pr
GO:0048858	3.12e-11	cell projection morphogenesis	3.12e-11	2.97e-09	2.01	7301	122	2054	69	[EcR - ecdysone receptor, ham - hamlet, sick - sickie, p120ctn - adherens junction protein p120, retn - retained, en - engrailed, Stlk - ste20-like kinase, Ptp69D - protein tyrosine phosphatase 69d, oc - ocelliless, Snoo - sno oncogene
GO:0010631	3.83e-11	epithelial cell migration	3.83e-11	3.6e-09	2.11	7301	101	2054	60	[sfl - sulfateless, EcR - ecdysone receptor, ru - roughoid, rib - ribbon, sr - stripe, if - inflated, grk - gurken, fz - frizzled, dlp - dally-like, CalpB - calpain-b, bun - bunched, bnl - branchless, Sin3A - cg8815 gene product
GO:0120039	3.85e-11	plasma membrane bounded cell projection morphogenesis	3.85e-11	3.57e-09	2.01	7301	120	2054	68	[EcR - ecdysone receptor, ham - hamlet, sick - sickie, p120ctn - adherens junction protein p120, retn - retained, en - engrailed, Stlk - ste20-like kinase, Ptp69D - protein tyrosine phosphatase 69d, oc - ocelliless, Snoo - sno oncogene
GO:0048812	3.85e-11	neuron projection morphogenesis	3.85e-11	3.52e-09	2.01	7301	120	2054	68	[EcR - ecdysone receptor, ham - hamlet, sick - sickie, p120ctn - adherens junction protein p120, retn - retained, en - engrailed, Stlk - ste20-like kinase, Ptp69D - protein tyrosine phosphatase 69d, oc - ocelliless, Snoo - sno oncogene
GO:0099536	4.27e-11	synaptic signaling	4.27e-11	3.85e-09	2.04	7301	113	2054	65	[inaE - inactivation no afterpotential e, 5-HT2 - serotonin receptor 2, Dys - dystrophin, Syt1 - synaptotagmin 1, svp - seven up, X11Lbeta - cg32677 gene product from transcript cg32677-rb, Frq1 - frequenin 1, cac - cacophony, lap - like
GO:0030036	8.27e-11	actin cytoskeleton organization	8.27e-11	7.36e-09	2.1	7301	100	2054	59	[Pi3K68D - phosphotidylinositol 3 kinase 68d, if - inflated, pbl - pebble, loco - locomotion defects, CG32264 - cg32264 gene product from transcript cg32264-rk, shot - short stop, lilli - lilliputian, CG13366 - cg13366 gene product from tr
GO:0099537	8.93e-11	trans-synaptic signaling	8.93e-11	7.85e-09	2.03	7301	112	2054	64	[inaE - inactivation no afterpotential e, 5-HT2 - serotonin receptor 2, Dys - dystrophin, Syt1 - synaptotagmin 1, svp - seven up, X11Lbeta - cg32677 gene product from transcript cg32677-rb, Frq1 - frequenin 1, cac - cacophony, lap - like
GO:0045664	8.93e-11	regulation of neuron differentiation	8.93e-11	7.75e-09	2.03	7301	112	2054	64	[EcR - ecdysone receptor, Gap1 - gtpase-activating protein 1, ham - hamlet, tinc - tincar, oc - ocelliless, nudC - cg9710 gene product from transcript cg9710-rb, fz - frizzled, pbl - pebble, babos - cg3624 gene product from transcript cg
GO:0050808	8.93e-11	synapse organization	8.93e-11	7.65e-09	2.03	7301	112	2054	64	[Ank2 - ankyrin 2, Frq1 - frequenin 1, cmpy - crimpy, AGO1 - argonaute-1, dlp - dally-like, neuroligin - cg13772 gene product from transcript cg13772-rb, Atg1 - autophagy-specific gene 1, Nos - nitric oxide synthase, Grip - glutamate rec
GO:0035295	9.39e-11	tube development	9.39e-11	7.94e-09	1.92	7301	139	2054	75	[grp - grapes, d - dachs, en - engrailed, if - inflated, scrib - scribbled, dve - defective proventriculus, elB - elbow b, sog - short gastrulation, pnr - pannier, pico - cg11940 gene product from transcript cg11940-rb, Nos - nitric
GO:0050890	1.31e-10	cognition	1.31e-10	1.09e-08	1.98	7301	120	2054	67	[EcR - ecdysone receptor, Nipped-B - cg17704 gene product from transcript cg17704-rg, nemy - no extended memory, Ank2 - ankyrin 2, scrib - scribbled, AGO1 - argonaute-1, dnc - dunce, dbr - debra, Pka-R1 - camp-dependent protein kinase r1
GO:0007611	1.31e-10	learning or memory	1.31e-10	1.08e-08	1.98	7301	120	2054	67	[EcR - ecdysone receptor, Nipped-B - cg17704 gene product from transcript cg17704-rg, nemy - no extended memory, Ank2 - ankyrin 2, scrib - scribbled, AGO1 - argonaute-1, dnc - dunce, dbr - debra, Pka-R1 - camp-dependent protein kinase r1
GO:0032990	1.38e-10	cell part morphogenesis	1.38e-10	1.13e-08	1.96	7301	125	2054	69	[EcR - ecdysone receptor, ham - hamlet, sick - sickie, p120ctn - adherens junction protein p120, retn - retained, en - engrailed, Stlk - ste20-like kinase, Ptp69D - protein tyrosine phosphatase 69d, oc - ocelliless, Snoo - sno oncogene
GO:0040008	1.7e-10	regulation of growth	1.7e-10	1.37e-08	1.75	7301	197	2054	97	[sfl - sulfateless, scrib - scribbled, cmpy - crimpy, fz - frizzled, dlp - dally-like, pix - pixie, pico - cg11940 gene product from transcript cg11940-rb, bun - bunched, trio - cg18214 gene product from transcript cg18214-ra, Mob2 - c
GO:0003002	1.87e-10	regionalization	1.87e-10	1.49e-08	1.76	7301	192	2054	95	[sfl - sulfateless, ru - roughoid, inv - invected, retn - retained, Dys - dystrophin, en - engrailed, grk - gurken, oc - ocelliless, AGO1 - argonaute-1, GEFmeso - guanine nucleotide exchange factor in mesoderm, fz - frizzled, dlp -
GO:0009968	1.95e-10	negative regulation of signal transduction	1.95e-10	1.54e-08	1.73	7301	208	2054	101	[Pi3K68D - phosphotidylinositol 3 kinase 68d, Mmp2 - matrix metalloproteinase 2, cmpy - crimpy, fz - frizzled, dnc - dunce, Pli - pellino, raw - cg12437 gene product from transcript cg12437-rb, bun - bunched, uif - uninflatable, Sin3A -
GO:0060255	2.18e-10	regulation of macromolecule metabolic process	2.18e-10	1.7e-08	1.28	7301	1105	2054	399	[Cyt-c-d - cytochrome c distal, scrib - scribbled, cmpy - crimpy, Pli - pellino, pix - pixie, SMC1 - cg6057 gene product from transcript cg6057-ra, Pka-R1 - camp-dependent protein kinase r1, chif - chiffon, elav - embryonic lethal abnorm
GO:0098916	2.29e-10	anterograde trans-synaptic signaling	2.29e-10	1.76e-08	2.02	7301	109	2054	62	[5-HT2 - serotonin receptor 2, Dys - dystrophin, Syt1 - synaptotagmin 1, svp - seven up, X11Lbeta - cg32677 gene product from transcript cg32677-rb, Frq1 - frequenin 1, cac - cacophony, lap - like-ap180, dnc - dunce, neuroligin - cg137
GO:0035239	2.29e-10	tube morphogenesis	2.29e-10	1.74e-08	2.02	7301	109	2054	62	[EcR - ecdysone receptor, rib - ribbon, en - engrailed, scrib - scribbled, Mmp2 - matrix metalloproteinase 2, fog - folded gastrulation, bab1 - bric a brac 1, raw - cg12437 gene product from transcript cg12437-rb, pbl - pebble, bnl - b
GO:0007268	2.29e-10	chemical synaptic transmission	2.29e-10	1.72e-08	2.02	7301	109	2054	62	[5-HT2 - serotonin receptor 2, Dys - dystrophin, Syt1 - synaptotagmin 1, svp - seven up, X11Lbeta - cg32677 gene product from transcript cg32677-rb, Frq1 - frequenin 1, cac - cacophony, lap - like-ap180, dnc - dunce, neuroligin - cg137
GO:0019222	2.46e-10	regulation of metabolic process	2.46e-10	1.83e-08	1.27	7301	1170	2054	419	[Cyt-c-d - cytochrome c distal, scrib - scribbled, cmpy - crimpy, Pli - pellino, pix - pixie, SMC1 - cg6057 gene product from transcript cg6057-ra, Pka-R1 - camp-dependent protein kinase r1, chif - chiffon, elav - embryonic lethal abnorm
GO:0040012	3.71e-10	regulation of locomotion	3.71e-10	2.73e-08	2.32	7301	66	2054	43	[kuz - kuzbanian, Egfr - epidermal growth factor receptor, hh - hedgehog, Tbh - tyramine beta hydroxylase, grk - gurken, fz - frizzled, Evi5 - cg11727 gene product from transcript cg11727-ra, vn - vein, CG6805 - cg6805 gene product from
GO:0048585	3.95e-10	negative regulation of response to stimulus	3.95e-10	2.87e-08	1.65	7301	248	2054	115	[Pi3K68D - phosphotidylinositol 3 kinase 68d, Mmp2 - matrix metalloproteinase 2, cmpy - crimpy, fz - frizzled, dnc - dunce, Pli - pellino, raw - cg12437 gene product from transcript cg12437-rb, bun - bunched, uif - uninflatable, Sin3A -
GO:0016331	4.75e-10	morphogenesis of embryonic epithelium	4.75e-10	3.42e-08	2.24	7301	73	2054	46	[Egfr - epidermal growth factor receptor, rib - ribbon, scrib - scribbled, step - steppke, cora - coracle, dlg1 - discs large 1, crb - crumbs, fog - folded gastrulation, jumu - jumeau, Abl - abl tyrosine kinase, raw - cg12437 gene pr
GO:0051171	5.07e-10	regulation of nitrogen compound metabolic process	5.07e-10	3.61e-08	1.29	7301	1028	2054	373	[Cyt-c-d - cytochrome c distal, scrib - scribbled, Mdh2 - malate dehydrogenase 2, cmpy - crimpy, Rpt6R - cg2241 gene product from transcript cg2241-ra, Pli - pellino, chif - chiffon, Pka-R1 - camp-dependent protein kinase r1, Hers - hist
GO:0022412	5.28e-10	cellular process involved in reproduction in multicellular organism	5.28e-10	3.72e-08	1.47	7301	440	2054	182	[grp - grapes, scrib - scribbled, if - inflated, clos - closca, CG9634 - cg9634 gene product from transcript cg9634-ra, egg - eggless, fz - frizzled, SoYb - sister of yb, CG13597 - cg13597 gene product from transcript cg13597-ra, bib -
GO:0031323	6.26e-10	regulation of cellular metabolic process	6.26e-10	4.37e-08	1.28	7301	1071	2054	386	[Cyt-c-d - cytochrome c distal, scrib - scribbled, cmpy - crimpy, Pli - pellino, Pka-R1 - camp-dependent protein kinase r1, chif - chiffon, elav - embryonic lethal abnormal vision, svr - silver, cact - cactus, Sin3A - cg8815 gene produ
GO:0022414	2.01e-09	reproductive process	2.01e-09	1.39e-07	1.33	7301	763	2054	286	[grp - grapes, Cyt-c-d - cytochrome c distal, scrib - scribbled, fz - frizzled, CG13597 - cg13597 gene product from transcript cg13597-ra, SoYb - sister of yb, bib - big brain, Pka-R1 - camp-dependent protein kinase r1, chif - chiffon, e
GO:0007015	2.06e-09	actin filament organization	2.06e-09	1.41e-07	2.19	7301	73	2054	45	[Hip1 - huntingtin interacting protein 1, sn - singed, sick - sickie, Fim - fimbrin, Src64B - src oncogene at 64b, qua - quail, pico - cg11940 gene product from transcript cg11940-rb, Pka-R1 - camp-dependent protein kinase r1, cdi - cent
GO:0040007	2.15e-09	growth	2.15e-09	1.46e-07	1.89	7301	126	2054	67	[Ank2 - ankyrin 2, fz - frizzled, dnc - dunce, Mmp1 - matrix metalloproteinase 1, neuroligin - cg13772 gene product from transcript cg13772-rb, raw - cg12437 gene product from transcript cg12437-rb, Atg1 - autophagy-specific gene 1, pan -
GO:0048589	2.15e-09	developmental growth	2.15e-09	1.44e-07	1.89	7301	126	2054	67	[Ank2 - ankyrin 2, fz - frizzled, dnc - dunce, Mmp1 - matrix metalloproteinase 1, raw - cg12437 gene product from transcript cg12437-rb, neuroligin - cg13772 gene product from transcript cg13772-rb, Atg1 - autophagy-specific gene 1, pan -
GO:0050767	2.57e-09	regulation of neurogenesis	2.57e-09	1.71e-07	1.77	7301	165	2054	82	[EcR - ecdysone receptor, Gap1 - gtpase-activating protein 1, ham - hamlet, tinc - tincar, oc - ocelliless, nudC - cg9710 gene product from transcript cg9710-rb, fz - frizzled, pbl - pebble, babos - cg3624 gene product from transcript cg
GO:0003006	2.59e-09	developmental process involved in reproduction	2.59e-09	1.7e-07	1.46	7301	415	2054	171	[Cyt-c-d - cytochrome c distal, rib - ribbon, scrib - scribbled, clos - closca, CG9634 - cg9634 gene product from transcript cg9634-ra, egg - eggless, CG42388 - cg42388 gene product from transcript cg42388-rc, raw - cg12437 gene product fr
GO:0098742	2.73e-09	cell-cell adhesion via plasma-membrane adhesion molecules	2.73e-09	1.77e-07	2.31	7301	60	2054	39	[beat-VI - cg14064 gene product from transcript cg14064-rb, fw - furrowed, beat-IIa - beaten path iia, if - inflated, beat-IIb - cg4135 gene product from transcript cg4135-rb, fz - frizzled, Fas2 - fasciclin 2, baz - bazooka, beat-VII -
GO:0007391	2.91e-09	dorsal closure	2.91e-09	1.87e-07	2.22	7301	69	2054	43	[Egfr - epidermal growth factor receptor, rib - ribbon, scrib - scribbled, step - steppke, cora - coracle, dlg1 - discs large 1, crb - crumbs, jumu - jumeau, Abl - abl tyrosine kinase, raw - cg12437 gene product from transcript cg12437
GO:0080090	3.96e-09	regulation of primary metabolic process	3.96e-09	2.53e-07	1.27	7301	1043	2054	373	[Cyt-c-d - cytochrome c distal, scrib - scribbled, Mdh2 - malate dehydrogenase 2, cmpy - crimpy, Rpt6R - cg2241 gene product from transcript cg2241-ra, Pli - pellino, chif - chiffon, Pka-R1 - camp-dependent protein kinase r1, Hers - hist
GO:0060429	8.17e-09	epithelium development	8.17e-09	5.17e-07	1.88	7301	119	2054	63	[grp - grapes, d - dachs, en - engrailed, scrib - scribbled, elB - elbow b, sog - short gastrulation, pnr - pannier, pico - cg11940 gene product from transcript cg11940-rb, Ser - serrate, Nos - nitric oxide synthase, bnl - branchless
GO:0019932	8.46e-09	second-messenger-mediated signaling	8.46e-09	5.3e-07	2.09	7301	80	2054	47	[CG34411 - cg34411 gene product from transcript cg34411-rb, Gycbeta100B - guanylyl cyclase beta-subunit at 100b, Gyc-89Db - guanylyl cyclase at 89db, Cng - cyclic-nucleotide-gated ion channel protein, Gyc-89Da - guanylyl cyclase at 89da, Ca-beta
GO:0051179	8.51e-09	localization	8.51e-09	5.28e-07	1.25	7301	1123	2054	396	[CG8632 - cg8632 gene product from transcript cg8632-ra, scrib - scribbled, Task6 - cg9637 gene product from transcript cg9637-rd, trpgamma - cg5996 gene product from transcript cg5996-rd, cmpy - crimpy, CG5021 - cg5021 gene product from trans
GO:0042592	8.68e-09	homeostatic process	8.68e-09	5.34e-07	1.55	7301	287	2054	125	[SNF4Agamma - snf4/amp-activated protein kinase gamma subunit, bmm - brummer, if - inflated, trpgamma - cg5996 gene product from transcript cg5996-rd, NLaz - neural lazarillo, CG12206 - cg12206 gene product from transcript cg12206-ra, CG33988
GO:0051270	1.09e-08	regulation of cellular component movement	1.09e-08	6.63e-07	2.24	7301	62	2054	39	[kuz - kuzbanian, Egfr - epidermal growth factor receptor, hh - hedgehog, grk - gurken, fz - frizzled, Evi5 - cg11727 gene product from transcript cg11727-ra, vn - vein, CG6805 - cg6805 gene product from transcript cg6805-ra, fra - frazz
GO:0051240	1.19e-08	positive regulation of multicellular organismal process	1.19e-08	7.21e-07	1.73	7301	164	2054	80	[EcR - ecdysone receptor, Gap1 - gtpase-activating protein 1, d - dachs, Ank2 - ankyrin 2, grk - gurken, cac - cacophony, bchs - blue cheese, oc - ocelliless, nudC - cg9710 gene product from transcript cg9710-rb, fz - frizzled, Nc -
GO:0007298	1.22e-08	border follicle cell migration	1.22e-08	7.33e-07	2.16	7301	69	2054	42	[EcR - ecdysone receptor, kuz - kuzbanian, Egfr - epidermal growth factor receptor, phl - pole hole, if - inflated, grk - gurken, ab - abrupt, fz - frizzled, Evi5 - cg11727 gene product from transcript cg11727-ra, CalpB - calpain-b, ba
GO:0048638	1.75e-08	regulation of developmental growth	1.75e-08	1.04e-06	1.78	7301	144	2054	72	[sfl - sulfateless, d - dachs, Ank2 - ankyrin 2, scrib - scribbled, cac - cacophony, bchs - blue cheese, fz - frizzled, dlp - dally-like, pico - cg11940 gene product from transcript cg11940-rb, Nos - nitric oxide synthase, shot - sho
GO:0007297	2.2e-08	ovarian follicle cell migration	2.2e-08	1.3e-06	2.08	7301	77	2054	45	[EcR - ecdysone receptor, kuz - kuzbanian, Egfr - epidermal growth factor receptor, phl - pole hole, if - inflated, grk - gurken, ab - abrupt, fz - frizzled, Evi5 - cg11727 gene product from transcript cg11727-ra, CalpB - calpain-b, bu
GO:0030534	2.51e-08	adult behavior	2.51e-08	1.47e-06	1.89	7301	109	2054	58	[trpgamma - cg5996 gene product from transcript cg5996-rd, cac - cacophony, oc - ocelliless, mtt - mangetout, dnc - dunce, Adar - adenosine deaminase acting on rna, neuroligin - cg13772 gene product from transcript cg13772-rb, DmsR-2 - dro
GO:0019935	2.63e-08	cyclic-nucleotide-mediated signaling	2.63e-08	1.52e-06	2.35	7301	50	2054	33	[Gycbeta100B - guanylyl cyclase beta-subunit at 100b, CG34411 - cg34411 gene product from transcript cg34411-rb, Gyc-89Db - guanylyl cyclase at 89db, Cng - cyclic-nucleotide-gated ion channel protein, Gyc-89Da - guanylyl cyclase at 89da, Gyc88E
GO:0007447	2.69e-08	imaginal disc pattern formation	2.69e-08	1.54e-06	2.09	7301	75	2054	44	[H15 - cg6604 gene product from transcript cg6604-ra, rl - rolled, inv - invected, ru - roughoid, Egfr - epidermal growth factor receptor, mid - midline, l(2)08717 - lethal (2) 08717, hh - hedgehog, en - engrailed, bi - bifid, cic -
GO:0006935	2.79e-08	chemotaxis	2.79e-08	1.59e-06	2.96	7301	24	2054	20	[wun2 - wunen-2, beat-IIIc - cg15138 gene product from transcript cg15138-ra, drl - derailed, hh - hedgehog, Ten-m - tenascin major, Wnt4 - wnt oncogene analog 4, Ptp69D - protein tyrosine phosphatase 69d, Sema-2a - cg4700 gene product fro
GO:2000145	2.97e-08	regulation of cell motility	2.97e-08	1.67e-06	2.37	7301	48	2054	32	[kuz - kuzbanian, Egfr - epidermal growth factor receptor, hh - hedgehog, grk - gurken, Evi5 - cg11727 gene product from transcript cg11727-ra, vn - vein, CG6805 - cg6805 gene product from transcript cg6805-ra, fra - frazzled, ena - enab
GO:0019219	3.21e-08	regulation of nucleobase-containing compound metabolic process	3.21e-08	1.79e-06	1.31	7301	728	2054	269	[scrib - scribbled, cmpy - crimpy, Rpt6R - cg2241 gene product from transcript cg2241-ra, chif - chiffon, Hers - histone gene-specific epigenetic repressor in late s phase, elav - embryonic lethal abnormal vision, CG9650 - cg9650 gene produc
GO:0010468	3.91e-08	regulation of gene expression	3.91e-08	2.17e-06	1.29	7301	843	2054	305	[scrib - scribbled, cmpy - crimpy, Rpt6R - cg2241 gene product from transcript cg2241-ra, pix - pixie, SMC1 - cg6057 gene product from transcript cg6057-ra, Hers - histone gene-specific epigenetic repressor in late s phase, p - pink, CG9650
GO:0022604	5.66e-08	regulation of cell morphogenesis	5.66e-08	3.11e-06	1.98	7301	86	2054	48	[kuz - kuzbanian, rib - ribbon, nudC - cg9710 gene product from transcript cg9710-rb, fz - frizzled, cta - concertina, fog - folded gastrulation, Abl - abl tyrosine kinase, raw - cg12437 gene product from transcript cg12437-rb, pbl - peb
GO:0097435	6.15e-08	supramolecular fiber organization	6.15e-08	3.36e-06	1.9	7301	101	2054	54	[Hip1 - huntingtin interacting protein 1, sick - sickie, if - inflated, Patronin - cg33130 gene product from transcript cg33130-rn, pico - cg11940 gene product from transcript cg11940-rb, Pka-R1 - camp-dependent protein kinase r1, CAP - cg18
Table S3 Complete results from GOrilla GO term enrichment analysis of 6mA-containing genes
GO:0090066	6.32e-08	regulation of anatomical structure size	6.32e-08	3.42e-06	1.76	7301	137	2054	68	[EcR - ecdysone receptor, dp - dumpy, Nipped-B - cg17704 gene product from transcript cg17704-rg, rib - ribbon, fz - frizzled, Mmp1 - matrix metalloproteinase 1, tmod - tropomodulin, raw - cg12437 gene product from transcript cg12437-rb, p
GO:2000112	7.08e-08	regulation of cellular macromolecule biosynthetic process	7.08e-08	3.8e-06	1.31	7301	724	2054	266	[scrib - scribbled, cmpy - crimpy, Rpt6R - cg2241 gene product from transcript cg2241-ra, chif - chiffon, Hers - histone gene-specific epigenetic repressor in late s phase, elav - embryonic lethal abnormal vision, CG9650 - cg9650 gene produc
GO:0030334	7.15e-08	regulation of cell migration	7.15e-08	3.81e-06	2.34	7301	47	2054	31	[kuz - kuzbanian, Egfr - epidermal growth factor receptor, hh - hedgehog, grk - gurken, Evi5 - cg11727 gene product from transcript cg11727-ra, vn - vein, fra - frazzled, bnl - branchless, sli - slit, ena - enabled, stl - stall, puc
GO:0051252	8.5e-08	regulation of RNA metabolic process	8.5e-08	4.5e-06	1.31	7301	697	2054	257	[scrib - scribbled, cmpy - crimpy, Rpt6R - cg2241 gene product from transcript cg2241-ra, Hers - histone gene-specific epigenetic repressor in late s phase, elav - embryonic lethal abnormal vision, CG9650 - cg9650 gene product from transcript
GO:0032956	8.6e-08	regulation of actin cytoskeleton organization	8.6e-08	4.51e-06	2.14	7301	63	2054	38	[p120ctn - adherens junction protein p120, if - inflated, step - steppke, Src64B - src oncogene at 64b, fog - folded gastrulation, fz - frizzled, cta - concertina, CG43658 - cg43658 gene product from transcript cg43658-rc, Abl - abl tyro
GO:0032970	8.6e-08	regulation of actin filament-based process	8.6e-08	4.48e-06	2.14	7301	63	2054	38	[p120ctn - adherens junction protein p120, if - inflated, step - steppke, Src64B - src oncogene at 64b, fog - folded gastrulation, fz - frizzled, cta - concertina, CG43658 - cg43658 gene product from transcript cg43658-rc, Abl - abl tyro
GO:0031326	9.15e-08	regulation of cellular biosynthetic process	9.15e-08	4.73e-06	1.3	7301	751	2054	274	[scrib - scribbled, cmpy - crimpy, Rpt6R - cg2241 gene product from transcript cg2241-ra, chif - chiffon, Hers - histone gene-specific epigenetic repressor in late s phase, elav - embryonic lethal abnormal vision, CG9650 - cg9650 gene produc
GO:0006357	9.36e-08	regulation of transcription by RNA polymerase II	9.36e-08	4.8e-06	1.43	7301	382	2054	154	[scrib - scribbled, cmpy - crimpy, Rpt6R - cg2241 gene product from transcript cg2241-ra, pnr - pannier, Oamb - octopamine receptor in mushroom bodies, ss - spineless, vnd - ventral nervous system defective, Abd-B - abdominal b, CG7056 -
GO:0010556	9.43e-08	regulation of macromolecule biosynthetic process	9.43e-08	4.8e-06	1.3	7301	726	2054	266	[scrib - scribbled, cmpy - crimpy, Rpt6R - cg2241 gene product from transcript cg2241-ra, chif - chiffon, Hers - histone gene-specific epigenetic repressor in late s phase, elav - embryonic lethal abnormal vision, CG9650 - cg9650 gene produc
GO:0051094	1.03e-07	positive regulation of developmental process	1.03e-07	5.22e-06	1.7	7301	157	2054	75	[EcR - ecdysone receptor, Gap1 - gtpase-activating protein 1, d - dachs, Ank2 - ankyrin 2, grk - gurken, cac - cacophony, bchs - blue cheese, oc - ocelliless, nudC - cg9710 gene product from transcript cg9710-rb, fz - frizzled, Nc -
GO:0042330	1.04e-07	taxis	1.04e-07	5.23e-06	2.09	7301	68	2054	40	[Timp - tissue inhibitor of metalloproteases, CG32100 - cg32100 gene product from transcript cg32100-ra, wun2 - wunen-2, drl - derailed, hh - hedgehog, svp - seven up, Ptp69D - protein tyrosine phosphatase 69d, norpA - no receptor potentia
GO:0009889	1.05e-07	regulation of biosynthetic process	1.05e-07	5.24e-06	1.3	7301	752	2054	274	[scrib - scribbled, cmpy - crimpy, Rpt6R - cg2241 gene product from transcript cg2241-ra, chif - chiffon, Hers - histone gene-specific epigenetic repressor in late s phase, elav - embryonic lethal abnormal vision, CG9650 - cg9650 gene produc
GO:0040017	1.1e-07	positive regulation of locomotion	1.1e-07	5.42e-06	2.46	7301	39	2054	27	[kuz - kuzbanian, Egfr - epidermal growth factor receptor, grk - gurken, fz - frizzled, vn - vein, CG6805 - cg6805 gene product from transcript cg6805-ra, fra - frazzled, ena - enabled, sli - slit, puc - puckered, Tie - tie-like rece
GO:0016198	1.23e-07	axon choice point recognition	1.23e-07	6.02e-06	3.16	7301	18	2054	16	[comm - commissureless, drl - derailed, fru - fruitless, tutl - turtle, ab - abrupt, dsx - doublesex, Abl - abl tyrosine kinase, Sema-1a - cg18405 gene product from transcript cg18405-rd, fra - frazzled, Trim9 - cg31721 gene product fr
GO:0048646	1.24e-07	anatomical structure formation involved in morphogenesis	1.24e-07	6.02e-06	1.54	7301	252	2054	109	[grp - grapes, Cyt-c-d - cytochrome c distal, if - inflated, Mmp2 - matrix metalloproteinase 2, clos - closca, Mmp1 - matrix metalloproteinase 1, chif - chiffon, fra - frazzled, bun - bunched, cact - cactus, poe - purity of essence,
GO:0050795	1.27e-07	regulation of behavior	1.27e-07	6.15e-06	2.1	7301	66	2054	39	[EcR - ecdysone receptor, 5-HT2 - serotonin receptor 2, SPR - sex peptide receptor, Tbh - tyramine beta hydroxylase, AGO1 - argonaute-1, Sir2 - cg5216 gene product from transcript cg5216-ra, Hsp83 - heat shock protein 83, Drip - cg9023 gen
GO:0006811	1.3e-07	ion transport	1.3e-07	6.24e-06	1.48	7301	307	2054	128	[CG12531 - cg12531 gene product from transcript cg12531-ra, CG8632 - cg8632 gene product from transcript cg8632-ra, Task6 - cg9637 gene product from transcript cg9637-rd, Glu-RI - glutamate receptor i, trpgamma - cg5996 gene product from transcr
GO:0048592	1.48e-07	eye morphogenesis	1.48e-07	7.05e-06	2.05	7301	71	2054	41	[ru - roughoid, p120ctn - adherens junction protein p120, hh - hedgehog, bi - bifid, cic - capicua, oc - ocelliless, fz - frizzled, crb - crumbs, Hrb98DE - heterogeneous nuclear ribonucleoprotein at 98de, Cul-3 - cullin-3, tkv - thic
GO:0090596	1.48e-07	sensory organ morphogenesis	1.48e-07	7e-06	2.05	7301	71	2054	41	[ru - roughoid, p120ctn - adherens junction protein p120, hh - hedgehog, bi - bifid, cic - capicua, oc - ocelliless, fz - frizzled, crb - crumbs, Hrb98DE - heterogeneous nuclear ribonucleoprotein at 98de, Cul-3 - cullin-3, tkv - thic
GO:0051234	1.69e-07	establishment of localization	1.69e-07	7.95e-06	1.25	7301	989	2054	347	[CG12531 - cg12531 gene product from transcript cg12531-ra, CG8632 - cg8632 gene product from transcript cg8632-ra, scrib - scribbled, Task6 - cg9637 gene product from transcript cg9637-rd, trpgamma - cg5996 gene product from transcript cg5996-r
GO:0010975	1.88e-07	regulation of neuron projection development	1.88e-07	8.76e-06	2.12	7301	62	2054	37	[ham - hamlet, kuz - kuzbanian, nudC - cg9710 gene product from transcript cg9710-rb, fz - frizzled, Abl - abl tyrosine kinase, pbl - pebble, babos - cg3624 gene product from transcript cg3624-ra, fra - frazzled, RhoGEF2 - cg9635 gene pr
GO:0042391	1.88e-07	regulation of membrane potential	1.88e-07	8.7e-06	2.12	7301	62	2054	37	[Task6 - cg9637 gene product from transcript cg9637-rd, cac - cacophony, Ca-alpha1T - ca[2+]-channel protein alpha[[1]] subunit t, SK - small conductance calcium-activated potassium channel, Slob - slowpoke binding protein, Adar - adenosine de
GO:0007626	2.12e-07	locomotory behavior	2.12e-07	9.74e-06	1.83	7301	109	2054	56	[EcR - ecdysone receptor, nemy - no extended memory, Syt1 - synaptotagmin 1, trpgamma - cg5996 gene product from transcript cg5996-rd, cac - cacophony, oc - ocelliless, dnc - dunce, Adar - adenosine deaminase acting on rna, DmsR-2 - drom
GO:0030001	2.16e-07	metal ion transport	2.16e-07	9.87e-06	1.78	7301	122	2054	61	[Task6 - cg9637 gene product from transcript cg9637-rd, trpgamma - cg5996 gene product from transcript cg5996-rd, ppk20 - pickpocket 20, cac - cacophony, SK - small conductance calcium-activated potassium channel, dve - defective proventriculu
GO:0045165	2.34e-07	cell fate commitment	2.34e-07	1.06e-05	1.89	7301	94	2054	50	[ham - hamlet, EcR - ecdysone receptor, ru - roughoid, svp - seven up, scrib - scribbled, oc - ocelliless, elB - elbow b, fz - frizzled, loco - locomotion defects, ths - thisbe, pyr - pyramus, Abd-B - abdominal b, N - notch, ast
GO:0006812	2.39e-07	cation transport	2.39e-07	1.08e-05	1.62	7301	187	2054	85	[CG8632 - cg8632 gene product from transcript cg8632-ra, Glu-RI - glutamate receptor i, Task6 - cg9637 gene product from transcript cg9637-rd, Cng - cyclic-nucleotide-gated ion channel protein, trpgamma - cg5996 gene product from transcript cg59
GO:0051272	2.74e-07	positive regulation of cellular component movement	2.74e-07	1.23e-05	2.43	7301	38	2054	26	[kuz - kuzbanian, Egfr - epidermal growth factor receptor, grk - gurken, fz - frizzled, vn - vein, CG6805 - cg6805 gene product from transcript cg6805-ra, fra - frazzled, ena - enabled, sli - slit, puc - puckered, Tie - tie-like rece
GO:0007416	2.99e-07	synapse assembly	2.99e-07	1.33e-05	2.47	7301	36	2054	25	[drl - derailed, AGO1 - argonaute-1, Atpalpha - na pump alpha subunit, dlg1 - discs large 1, neuroligin - cg13772 gene product from transcript cg13772-rb, Atg1 - autophagy-specific gene 1, Tl - toll, Nos - nitric oxide synthase, baz - ba
GO:0006810	3.28e-07	transport	3.28e-07	1.45e-05	1.25	7301	959	2054	336	[CG12531 - cg12531 gene product from transcript cg12531-ra, CG8632 - cg8632 gene product from transcript cg8632-ra, Task6 - cg9637 gene product from transcript cg9637-rd, scrib - scribbled, trpgamma - cg5996 gene product from transcript cg5996-r
GO:1901184	3.37e-07	regulation of ERBB signaling pathway	3.37e-07	1.48e-05	2.55	7301	32	2054	23	[Gap1 - gtpase-activating protein 1, Pi3K68D - phosphotidylinositol 3 kinase 68d, Mkp3 - mitogen-activated protein kinase phosphatase 3, scrib - scribbled, pum - pumilio, CG8965 - cg8965 gene product from transcript cg8965-ra, step - steppke
GO:2000147	3.37e-07	positive regulation of cell motility	3.37e-07	1.47e-05	2.55	7301	32	2054	23	[Dscam - down syndrome cell adhesion molecule, kuz - kuzbanian, Egfr - epidermal growth factor receptor, grk - gurken, Sema-2a - cg4700 gene product from transcript cg4700-rc, Pvf2 - pdgf- and vegf-related factor 2, Pvf3 - pdgf- and vegf-rel
GO:0042058	3.37e-07	regulation of epidermal growth factor receptor signaling pathway	3.37e-07	1.46e-05	2.55	7301	32	2054	23	[Gap1 - gtpase-activating protein 1, Pi3K68D - phosphotidylinositol 3 kinase 68d, Mkp3 - mitogen-activated protein kinase phosphatase 3, scrib - scribbled, pum - pumilio, step - steppke, CG8965 - cg8965 gene product from transcript cg8965-ra
GO:0007517	3.37e-07	muscle organ development	3.37e-07	1.45e-05	2.55	7301	32	2054	23	[nau - nautilus, retn - retained, sr - stripe, Dys - dystrophin, Mef2 - myocyte enhancer factor 2, fru - fruitless, klar - klarsicht, sls - sallimus, tw - protein o-mannosyltransferase 2, HLH54F - cg5005 gene product from transcript cg
GO:0042127	3.4e-07	regulation of cell proliferation	3.4e-07	1.46e-05	1.66	7301	158	2054	74	[EcR - ecdysone receptor, ham - hamlet, Mmp2 - matrix metalloproteinase 2, scrib - scribbled, wdp - windpipe, fz - frizzled, Nc - nedd2-like caspase, pan - pangolin, mtd - mustard, Nos - nitric oxide synthase, bun - bunched, Tie -
GO:0007166	3.81e-07	cell surface receptor signaling pathway	3.81e-07	1.62e-05	1.49	7301	274	2054	115	[inaE - inactivation no afterpotential e, sfl - sulfateless, E(spl)m2-BFM - enhancer of split m2, bearded family member, clos - closca, fz - frizzled, Pli - pellino, dlp - dally-like, pnr - pannier, bib - big brain, mthl3 - methuselah-
GO:0050919	3.91e-07	negative chemotaxis	3.91e-07	1.65e-05	3.14	7301	17	2054	15	[wun2 - wunen-2, beat-IIIc - cg15138 gene product from transcript cg15138-ra, drl - derailed, Wnt4 - wnt oncogene analog 4, Ptp69D - protein tyrosine phosphatase 69d, Sema-2a - cg4700 gene product from transcript cg4700-rc, Tl - toll, robo3
GO:0003008	3.98e-07	system process	3.98e-07	1.67e-05	1.37	7301	450	2054	174	[ru - roughoid, nemy - no extended memory, scrib - scribbled, if - inflated, trpgamma - cg5996 gene product from transcript cg5996-rd, Mdr65 - multiple drug resistance 65, CG6053 - cg6053 gene product from transcript cg6053-rc, dnc - dunce
GO:0048813	4.43e-07	dendrite morphogenesis	4.43e-07	1.85e-05	1.96	7301	78	2054	43	[EcR - ecdysone receptor, ham - hamlet, acj6 - abnormal chemosensory jump 6, retn - retained, ct - cut, Rel - relish, fs(1)h - female sterile (1) homeotic, pum - pumilio, Ptp69D - protein tyrosine phosphatase 69d, Snoo - sno oncogene,
GO:0048149	5.31e-07	behavioral response to ethanol	5.31e-07	2.21e-05	2.34	7301	41	2054	27	[rl - rolled, Egfr - epidermal growth factor receptor, pum - pumilio, Tbh - tyramine beta hydroxylase, AcCoAS - acetyl coenzyme a synthase, dlg1 - discs large 1, Sir2 - cg5216 gene product from transcript cg5216-ra, hppy - happyhour, dnc
GO:0061061	5.51e-07	muscle structure development	5.51e-07	2.27e-05	1.96	7301	76	2054	42	[sr - stripe, retn - retained, Dys - dystrophin, cora - coracle, Tl - toll, ths - thisbe, Sin3A - cg8815 gene product from transcript cg8815-rc, eya - eyes absent, CG13366 - cg13366 gene product from transcript cg13366-ra, pyr - pyramu
GO:0007612	6.73e-07	learning	6.73e-07	2.76e-05	2.22	7301	48	2054	30	[Nipped-B - cg17704 gene product from transcript cg17704-rg, drl - derailed, Egfr - epidermal growth factor receptor, prt - portabella, Tbh - tyramine beta hydroxylase, AGO1 - argonaute-1, dnc - dunce, vn - vein, eag - ether a go-go, Pka
GO:0009893	6.88e-07	positive regulation of metabolic process	6.88e-07	2.8e-05	1.35	7301	490	2054	186	[Cyt-c-d - cytochrome c distal, egg - eggless, Mdh2 - malate dehydrogenase 2, Rpt6R - cg2241 gene product from transcript cg2241-ra, Pli - pellino, pnr - pannier, chif - chiffon, p - pink, cact - cactus, Oamb - octopamine receptor in m
GO:0001745	7.07e-07	compound eye morphogenesis	7.07e-07	2.86e-05	2.06	7301	62	2054	36	[ru - roughoid, p120ctn - adherens junction protein p120, hh - hedgehog, bi - bifid, oc - ocelliless, fz - frizzled, crb - crumbs, Hrb98DE - heterogeneous nuclear ribonucleoprotein at 98de, Cul-3 - cullin-3, tkv - thickveins, bnl - b
GO:0048520	7.26e-07	positive regulation of behavior	7.26e-07	2.93e-05	2.88	7301	21	2054	17	[EcR - ecdysone receptor, Hk - hyperkinetic, 5-HT2 - serotonin receptor 2, Ih - i[[h]] channel, Shab - shaker cognate b, Sir2 - cg5216 gene product from transcript cg5216-ra, mnb - minibrain, foxo - forkhead box, sub-group o, Dh31 - diur
GO:0006355	7.68e-07	regulation of transcription, DNA-templated	7.68e-07	3.08e-05	1.3	7301	637	2054	233	[scrib - scribbled, cmpy - crimpy, Rpt6R - cg2241 gene product from transcript cg2241-ra, Hers - histone gene-specific epigenetic repressor in late s phase, CG9650 - cg9650 gene product from transcript cg9650-rg, Sin3A - cg8815 gene product fr
GO:2001141	7.68e-07	regulation of RNA biosynthetic process	7.68e-07	3.06e-05	1.3	7301	637	2054	233	[scrib - scribbled, cmpy - crimpy, Rpt6R - cg2241 gene product from transcript cg2241-ra, Hers - histone gene-specific epigenetic repressor in late s phase, CG9650 - cg9650 gene product from transcript cg9650-rg, Sin3A - cg8815 gene product fr
GO:1903506	7.68e-07	regulation of nucleic acid-templated transcription	7.68e-07	3.04e-05	1.3	7301	637	2054	233	[scrib - scribbled, cmpy - crimpy, Rpt6R - cg2241 gene product from transcript cg2241-ra, Hers - histone gene-specific epigenetic repressor in late s phase, CG9650 - cg9650 gene product from transcript cg9650-rg, Sin3A - cg8815 gene product fr
GO:0030335	8.74e-07	positive regulation of cell migration	8.74e-07	3.44e-05	2.52	7301	31	2054	22	[kuz - kuzbanian, Dscam - down syndrome cell adhesion molecule, Egfr - epidermal growth factor receptor, grk - gurken, Sema-2a - cg4700 gene product from transcript cg4700-rc, Pvf2 - pdgf- and vegf-related factor 2, Pvf3 - pdgf- and vegf-rel
GO:0008347	9.02e-07	glial cell migration	9.02e-07	3.53e-05	2.7	7301	25	2054	19	[kuz - kuzbanian, hh - hedgehog, numb - cg3779 gene product from transcript cg3779-rb, ey - eyeless, Rho1 - cg8416 gene product from transcript cg8416-rb, crn - crooked neck, gish - gilgamesh, jing - cg9397 gene product from transcript cg9
GO:0007423	9.13e-07	sensory organ development	9.13e-07	3.55e-05	1.63	7301	164	2054	75	[mam - mastermind, fw - furrowed, E(spl)m2-BFM - enhancer of split m2, bearded family member, scrib - scribbled, oc - ocelliless, bchs - blue cheese, Gp150 - cg5820 gene product from transcript cg5820-ra, Nc - nedd2-like caspase, dlp - d
GO:0051172	9.22e-07	negative regulation of nitrogen compound metabolic process	9.22e-07	3.57e-05	1.42	7301	346	2054	138	[Sfp24Ba - seminal fluid protein 24ba, wee - cg4488 gene product from transcript cg4488-rb, scrib - scribbled, egg - eggless, raw - cg12437 gene product from transcript cg12437-rb, pnr - pannier, Hers - histone gene-specific epigenetic repre
GO:0007622	9.34e-07	rhythmic behavior	9.34e-07	3.59e-05	2.26	7301	44	2054	28	[Nipped-B - cg17704 gene product from transcript cg17704-rg, numb - cg3779 gene product from transcript cg3779-rb, dlg1 - discs large 1, vri - vrille, dnc - dunce, Adar - adenosine deaminase acting on rna, CG33988 - cg33988 gene product from
GO:0048512	1.09e-06	circadian behavior	1.09e-06	4.17e-05	2.29	7301	42	2054	27	[Nipped-B - cg17704 gene product from transcript cg17704-rg, vri - vrille, dlg1 - discs large 1, Adar - adenosine deaminase acting on rna, dnc - dunce, CG33988 - cg33988 gene product from transcript cg33988-rb, dysc - dyschronic, Cul-3 - c
GO:0016199	1.23e-06	axon midline choice point recognition	1.23e-06	4.7e-05	3.11	7301	16	2054	14	[comm - commissureless, drl - derailed, fru - fruitless, tutl - turtle, dsx - doublesex, Abl - abl tyrosine kinase, Sema-1a - cg18405 gene product from transcript cg18405-rd, fra - frazzled, Trim9 - cg31721 gene product from transcript c
GO:0010605	1.48e-06	negative regulation of macromolecule metabolic process	1.48e-06	5.58e-05	1.37	7301	415	2054	160	[Sfp24Ba - seminal fluid protein 24ba, wee - cg4488 gene product from transcript cg4488-rb, scrib - scribbled, egg - eggless, pix - pixie, raw - cg12437 gene product from transcript cg12437-rb, pnr - pannier, SMC1 - cg6057 gene product fro
GO:0022612	1.52e-06	gland morphogenesis	1.52e-06	5.72e-05	2.19	7301	47	2054	29	[CrebA - cyclic-amp response element binding protein a, drl - derailed, retn - retained, rib - ribbon, if - inflated, Mdh2 - malate dehydrogenase 2, cora - coracle, Src64B - src oncogene at 64b, crb - crumbs, fz - frizzled, fog - fol
GO:0007435	1.52e-06	salivary gland morphogenesis	1.52e-06	5.68e-05	2.19	7301	47	2054	29	[CrebA - cyclic-amp response element binding protein a, drl - derailed, rib - ribbon, retn - retained, if - inflated, Mdh2 - malate dehydrogenase 2, cora - coracle, Src64B - src oncogene at 64b, crb - crumbs, fog - folded gastrulation,
GO:0007010	1.6e-06	cytoskeleton organization	1.6e-06	5.97e-05	1.47	7301	263	2054	109	[CG7993 - cg7993 gene product from transcript cg7993-ra, grp - grapes, wee - cg4488 gene product from transcript cg4488-rb, Pi3K68D - phosphotidylinositol 3 kinase 68d, rib - ribbon, if - inflated, Patronin - cg33130 gene product from transc
GO:2000027	1.63e-06	regulation of animal organ morphogenesis	1.63e-06	6.02e-05	1.99	7301	66	2054	37	[Gap1 - gtpase-activating protein 1, rl - rolled, Cyt-c-d - cytochrome c distal, Egfr - epidermal growth factor receptor, norpA - no receptor potential a, tinc - tincar, oc - ocelliless, Src64B - src oncogene at 64b, Nc - nedd2-like casp
GO:0009954	1.73e-06	proximal/distal pattern formation	1.73e-06	6.36e-05	2.96	7301	18	2054	15	[rl - rolled, ru - roughoid, Egfr - epidermal growth factor receptor, hh - hedgehog, cora - coracle, spen - split ends, vn - vein, rho - rhomboid, jing - cg9397 gene product from transcript cg9397-ri, hth - homothorax, Lim1 - cg11354
GO:0007398	1.73e-06	ectoderm development	1.73e-06	6.33e-05	2.96	7301	18	2054	15	[mam - mastermind, hh - hedgehog, sr - stripe, pdm2 - pou domain protein 2, sog - short gastrulation, neur - neuralized, pnr - pannier, bib - big brain, shn - schnurri, sim - single-minded, Dl - delta, ush - u-shaped, vnd - ventr
GO:0031032	1.81e-06	actomyosin structure organization	1.81e-06	6.59e-05	2.21	7301	45	2054	28	[if - inflated, cora - coracle, Src64B - src oncogene at 64b, crb - crumbs, pbl - pebble, cher - cheerio, lilli - lilliputian, CG34347 - cg34347 gene product from transcript cg34347-rb, CG13366 - cg13366 gene product from transcript cg13
GO:0051093	1.91e-06	negative regulation of developmental process	1.91e-06	6.93e-05	1.64	7301	150	2054	69	[Gap1 - gtpase-activating protein 1, EcR - ecdysone receptor, scrib - scribbled, CG9634 - cg9634 gene product from transcript cg9634-ra, Snoo - sno oncogene, bab1 - bric a brac 1, Ser - serrate, bun - bunched, stj - straightjacket, Abd-B
GO:0048584	2.18e-06	positive regulation of response to stimulus	2.18e-06	7.84e-05	1.45	7301	285	2054	116	[Mmp2 - matrix metalloproteinase 2, GNBP1 - gram-negative bacteria binding protein 1, fz - frizzled, GNBP2 - gram-negative bacteria binding protein 2, dlp - dally-like, cact - cactus, CG4853 - cg4853 gene product from transcript cg4853-ra, t
GO:0016049	2.25e-06	cell growth	2.25e-06	8.05e-05	2.06	7301	57	2054	33	[Ank2 - ankyrin 2, fz - frizzled, dnc - dunce, path - pathetic, raw - cg12437 gene product from transcript cg12437-rb, pan - pangolin, eag - ether a go-go, tkv - thickveins, ine - inebriated, RhoGEF2 - cg9635 gene product from transcri
GO:0048878	2.28e-06	chemical homeostasis	2.28e-06	8.12e-05	1.59	7301	170	2054	76	[SNF4Agamma - snf4/amp-activated protein kinase gamma subunit, EcR - ecdysone receptor, bmm - brummer, svp - seven up, NLaz - neural lazarillo, trpgamma - cg5996 gene product from transcript cg5996-rd, cac - cacophony, Glut1 - glucose tran
GO:0035222	2.33e-06	wing disc pattern formation	2.33e-06	8.24e-05	2.13	7301	50	2054	30	[inv - invected, en - engrailed, hh - hedgehog, l(2)08717 - lethal (2) 08717, bi - bifid, cic - capicua, CG13830 - cg13830 gene product from transcript cg13830-rd, dlp - dally-like, tkv - thickveins, CG5890 - cg5890 gene product from t
GO:0060562	2.66e-06	epithelial tube morphogenesis	2.66e-06	9.37e-05	1.96	7301	67	2054	37	[EcR - ecdysone receptor, Timp - tissue inhibitor of metalloproteases, Egfr - epidermal growth factor receptor, phl - pole hole, en - engrailed, rib - ribbon, ct - cut, hh - hedgehog, bi - bifid, scrib - scribbled, crb - crumbs, fog
GO:0030154	2.8e-06	cell differentiation	2.8e-06	9.82e-05	1.56	7301	182	2054	80	[inaE - inactivation no afterpotential e, EcR - ecdysone receptor, retn - retained, scrib - scribbled, svp - seven up, fz - frizzled, CG31033 - cg31033 gene product from transcript cg31033-rc, CG13597 - cg13597 gene product from transcript
GO:0001709	2.87e-06	cell fate determination	2.87e-06	0.0001	1.8	7301	95	2054	48	[kuz - kuzbanian, enc - encore, brat - brain tumor, Egfr - epidermal growth factor receptor, mid - midline, inv - invected, mam - mastermind, spn-E - spindle e, en - engrailed, svp - seven up, numb - cg3779 gene product from transcri
GO:0030100	2.97e-06	regulation of endocytosis	2.97e-06	0.000103	2.28	7301	39	2054	25	[Hip1 - huntingtin interacting protein 1, brat - brain tumor, scrib - scribbled, numb - cg3779 gene product from transcript cg3779-rb, norpA - no receptor potential a, step - steppke, lap - like-ap180, wdp - windpipe, BicD - bicaudal d,
GO:0060560	3.09e-06	developmental growth involved in morphogenesis	3.09e-06	0.000107	2.01	7301	60	2054	34	[Timp - tissue inhibitor of metalloproteases, Ank2 - ankyrin 2, fz - frizzled, dnc - dunce, path - pathetic, Mmp1 - matrix metalloproteinase 1, Abl - abl tyrosine kinase, raw - cg12437 gene product from transcript cg12437-rb, pan - pango
GO:0044087	3.19e-06	regulation of cellular component biogenesis	3.19e-06	0.00011	1.54	7301	191	2054	83	[Syt1 - synaptotagmin 1, Ank2 - ankyrin 2, Mmp2 - matrix metalloproteinase 2, if - inflated, cac - cacophony, fz - frizzled, Rpt6R - cg2241 gene product from transcript cg2241-ra, lt - light, tmod - tropomodulin, pbl - pebble, svr -
GO:0007419	3.3e-06	ventral cord development	3.3e-06	0.000113	1.97	7301	65	2054	36	[kuz - kuzbanian, brat - brain tumor, Timp - tissue inhibitor of metalloproteases, Nup358 - nucleoporin 358, if - inflated, Mmp2 - matrix metalloproteinase 2, svp - seven up, numb - cg3779 gene product from transcript cg3779-rb, pea - pe
GO:0010629	3.37e-06	negative regulation of gene expression	3.37e-06	0.000115	1.42	7301	302	2054	121	[scrib - scribbled, egg - eggless, pix - pixie, pnr - pannier, SMC1 - cg6057 gene product from transcript cg6057-ra, Hers - histone gene-specific epigenetic repressor in late s phase, elav - embryonic lethal abnormal vision, Cbp80 - cap bi
GO:0006813	3.45e-06	potassium ion transport	3.45e-06	0.000117	2.31	7301	37	2054	24	[CG33310 - cg33310 gene product from transcript cg33310-ra, Hk - hyperkinetic, Task6 - cg9637 gene product from transcript cg9637-rd, Shab - shaker cognate b, Ih - i[[h]] channel, Atpalpha - na pump alpha subunit, SK - small conductance calc
GO:0007156	3.97e-06	homophilic cell adhesion via plasma membrane adhesion molecules	3.97e-06	0.000134	2.34	7301	35	2054	23	[fw - furrowed, tutl - turtle, Cad99C - cadherin 99c, stan - starry night, fz - frizzled, Dscam4 - down syndrome cell adhesion molecule 4, Lac - lachesin, caps - capricious, klg - klingon, Cad86C - cadherin 86c, kug - kugelei, Fas2
GO:0010558	4.88e-06	negative regulation of macromolecule biosynthetic process	4.88e-06	0.000164	1.48	7301	236	2054	98	[scrib - scribbled, egg - eggless, pnr - pannier, Hers - histone gene-specific epigenetic repressor in late s phase, elav - embryonic lethal abnormal vision, Oamb - octopamine receptor in mushroom bodies, Sin3A - cg8815 gene product from tra
GO:2000113	4.88e-06	negative regulation of cellular macromolecule biosynthetic process	4.88e-06	0.000163	1.48	7301	236	2054	98	[scrib - scribbled, egg - eggless, pnr - pannier, Hers - histone gene-specific epigenetic repressor in late s phase, elav - embryonic lethal abnormal vision, Oamb - octopamine receptor in mushroom bodies, Sin3A - cg8815 gene product from tra
GO:0009892	5.16e-06	negative regulation of metabolic process	5.16e-06	0.000171	1.34	7301	438	2054	165	[Sfp24Ba - seminal fluid protein 24ba, wee - cg4488 gene product from transcript cg4488-rb, scrib - scribbled, egg - eggless, pix - pixie, raw - cg12437 gene product from transcript cg12437-rb, pnr - pannier, SMC1 - cg6057 gene product fro
GO:0048259	5.17e-06	regulation of receptor-mediated endocytosis	5.17e-06	0.000171	2.93	7301	17	2054	14	[comm - commissureless, Hip1 - huntingtin interacting protein 1, mim - missing-in-metastasis, Cad99C - cadherin 99c, norpA - no receptor potential a, Graf - cg8948 gene product from transcript cg8948-rb, lap - like-ap180, BicD - bicaudal d
GO:0051050	5.37e-06	positive regulation of transport	5.37e-06	0.000176	1.9	7301	71	2054	38	[Hip1 - huntingtin interacting protein 1, ru - roughoid, Syt1 - synaptotagmin 1, Nup358 - nucleoporin 358, Nup214 - nucleoporin 214, numb - cg3779 gene product from transcript cg3779-rb, cac - cacophony, norpA - no receptor potential a, Gl
GO:0120035	5.7e-06	regulation of plasma membrane bounded cell projection organization	5.7e-06	0.000186	1.8	7301	89	2054	45	[kuz - kuzbanian, ham - hamlet, nudC - cg9710 gene product from transcript cg9710-rb, fz - frizzled, Abl - abl tyrosine kinase, pbl - pebble, babos - cg3624 gene product from transcript cg3624-ra, fra - frazzled, baz - bazooka, ena - e
GO:0007422	5.8e-06	peripheral nervous system development	5.8e-06	0.000189	2.22	7301	40	2054	25	[EcR - ecdysone receptor, Egfr - epidermal growth factor receptor, ct - cut, Pex1 - peroxin 1, CycE - cyclin e, neur - neuralized, vn - vein, alphaTub67C - alpha-tubulin at 67c, Npc1b - niemann-pick type c-1b, puc - puckered, Appl -
GO:0042752	5.82e-06	regulation of circadian rhythm	5.82e-06	0.000188	2.04	7301	54	2054	31	[EcR - ecdysone receptor, norpA - no receptor potential a, eys - eyes shut, Adar - adenosine deaminase acting on rna, Hsp83 - heat shock protein 83, Dh31 - diuretic hormone 31, 5-HT1A - serotonin receptor 1a, Cul-3 - cullin-3, Rdl - resi
GO:0048511	6.34e-06	rhythmic process	6.34e-06	0.000204	1.99	7301	59	2054	33	[Nipped-B - cg17704 gene product from transcript cg17704-rg, numb - cg3779 gene product from transcript cg3779-rb, dlg1 - discs large 1, vri - vrille, Adar - adenosine deaminase acting on rna, dnc - dunce, B4 - cg9239 gene product from trans
GO:0032535	6.63e-06	regulation of cellular component size	6.63e-06	0.000213	1.78	7301	92	2054	46	[Nipped-B - cg17704 gene product from transcript cg17704-rg, rl - rolled, Src64B - src oncogene at 64b, hppy - happyhour, path - pathetic, Abl - abl tyrosine kinase, tmod - tropomodulin, pbl - pebble, pico - cg11940 gene product from tra
GO:0019933	6.87e-06	cAMP-mediated signaling	6.87e-06	0.000219	2.24	7301	38	2054	24	[CG34411 - cg34411 gene product from transcript cg34411-rb, Ac76E - adenylyl cyclase 76e, CG15556 - cg15556 gene product from transcript cg15556-ra, Oct-TyrR - octopamine-tyramine receptor, Octbeta2R - cg33976 gene product from transcript cg3397
GO:0016201	7.64e-06	synaptic target inhibition	7.64e-06	0.000243	3.26	7301	12	2054	11	[beat-IIIc - cg15138 gene product from transcript cg15138-ra, lea - leak, Glt - glutactin, Wnt4 - wnt oncogene analog 4, sli - slit, Ptp69D - protein tyrosine phosphatase 69d, Sema-2a - cg4700 gene product from transcript cg4700-rc, fz2 -
GO:0060249	7.65e-06	anatomical structure homeostasis	7.65e-06	0.000242	1.82	7301	82	2054	42	[Egfr - epidermal growth factor receptor, Ank2 - ankyrin 2, Dys - dystrophin, Mkp3 - mitogen-activated protein kinase phosphatase 3, if - inflated, cac - cacophony, nbs - cg6754 gene product from transcript cg6754-rd, wdp - windpipe, Atpal
GO:0009890	7.73e-06	negative regulation of biosynthetic process	7.73e-06	0.000243	1.46	7301	244	2054	100	[scrib - scribbled, egg - eggless, pnr - pannier, Hers - histone gene-specific epigenetic repressor in late s phase, elav - embryonic lethal abnormal vision, Oamb - octopamine receptor in mushroom bodies, Sin3A - cg8815 gene product from tra
GO:0031327	7.73e-06	negative regulation of cellular biosynthetic process	7.73e-06	0.000242	1.46	7301	244	2054	100	[scrib - scribbled, egg - eggless, pnr - pannier, Hers - histone gene-specific epigenetic repressor in late s phase, elav - embryonic lethal abnormal vision, Oamb - octopamine receptor in mushroom bodies, Sin3A - cg8815 gene product from tra
GO:0031324	7.81e-06	negative regulation of cellular metabolic process	7.81e-06	0.000244	1.36	7301	370	2054	142	[Sfp24Ba - seminal fluid protein 24ba, wee - cg4488 gene product from transcript cg4488-rb, scrib - scribbled, egg - eggless, raw - cg12437 gene product from transcript cg12437-rb, pnr - pannier, Hers - histone gene-specific epigenetic repre
GO:0007167	7.81e-06	enzyme linked receptor protein signaling pathway	7.81e-06	0.000243	1.73	7301	103	2054	50	[sfl - sulfateless, clos - closca, grk - gurken, Gp150 - cg5820 gene product from transcript cg5820-ra, sog - short gastrulation, pnr - pannier, ths - thisbe, bun - bunched, bnl - branchless, Tie - tie-like receptor tyrosine kinase, ck
GO:0007623	7.87e-06	circadian rhythm	7.87e-06	0.000243	2	7301	57	2054	32	[Nipped-B - cg17704 gene product from transcript cg17704-rg, dlg1 - discs large 1, vri - vrille, Adar - adenosine deaminase acting on rna, dnc - dunce, B4 - cg9239 gene product from transcript cg9239-rc, CG33988 - cg33988 gene product from t
GO:0045475	8.08e-06	locomotor rhythm	8.08e-06	0.000249	2.27	7301	36	2054	23	[Mef2 - myocyte enhancer factor 2, Ih - i[[h]] channel, itp - ion transport peptide, vri - vrille, dlg1 - discs large 1, sxc - super sex combs, dnc - dunce, Adar - adenosine deaminase acting on rna, foxo - forkhead box, sub-group o, sgg
GO:0031344	8.33e-06	regulation of cell projection organization	8.33e-06	0.000255	1.78	7301	90	2054	45	[kuz - kuzbanian, ham - hamlet, nudC - cg9710 gene product from transcript cg9710-rb, fz - frizzled, Abl - abl tyrosine kinase, pbl - pebble, babos - cg3624 gene product from transcript cg3624-ra, fra - frazzled, baz - bazooka, ena - e
GO:0010769	8.81e-06	regulation of cell morphogenesis involved in differentiation	8.81e-06	0.000269	2.06	7301	50	2054	29	[kuz - kuzbanian, nudC - cg9710 gene product from transcript cg9710-rb, fz - frizzled, pbl - pebble, babos - cg3624 gene product from transcript cg3624-ra, fra - frazzled, RhoGEF2 - cg9635 gene product from transcript cg9635-rf, dar1 - den
GO:0007498	8.81e-06	mesoderm development	8.81e-06	0.000267	2.06	7301	50	2054	29	[hh - hedgehog, CG43897 - cg43897 gene product from transcript cg43897-rl, fog - folded gastrulation, neur - neuralized, bib - big brain, ths - thisbe, eya - eyes absent, stumps - cg31317 gene product from transcript cg31317-rc, Abd-B -
GO:0007507	9.04e-06	heart development	9.04e-06	0.000273	2.15	7301	43	2054	26	[H15 - cg6604 gene product from transcript cg6604-ra, mid - midline, hh - hedgehog, svp - seven up, numb - cg3779 gene product from transcript cg3779-rb, fz - frizzled, Tl - toll, pan - pangolin, pnr - pannier, tkv - thickveins, tup -
GO:0007613	1.05e-05	memory	1.05e-05	0.000315	1.78	7301	88	2054	44	[EcR - ecdysone receptor, Nipped-B - cg17704 gene product from transcript cg17704-rg, drl - derailed, Ank2 - ankyrin 2, nemy - no extended memory, scrib - scribbled, pum - pumilio, Tbh - tyramine beta hydroxylase, Src64B - src oncogene a
GO:0051493	1.1e-05	regulation of cytoskeleton organization	1.1e-05	0.000329	1.71	7301	104	2054	50	[p120ctn - adherens junction protein p120, gwl - greatwall, if - inflated, Patronin - cg33130 gene product from transcript cg33130-rn, fog - folded gastrulation, cta - concertina, fz - frizzled, tmod - tropomodulin, pbl - pebble, svr -
GO:0051241	1.16e-05	negative regulation of multicellular organismal process	1.16e-05	0.000345	1.59	7301	148	2054	66	[EcR - ecdysone receptor, Gap1 - gtpase-activating protein 1, scrib - scribbled, bab1 - bric a brac 1, Ser - serrate, stj - straightjacket, Sin3A - cg8815 gene product from transcript cg8815-rc, Abd-B - abdominal b, CG15537 - cg15537 gen
GO:0010604	1.18e-05	positive regulation of macromolecule metabolic process	1.18e-05	0.000352	1.32	7301	459	2054	170	[Cyt-c-d - cytochrome c distal, egg - eggless, Mdh2 - malate dehydrogenase 2, Rpt6R - cg2241 gene product from transcript cg2241-ra, Pli - pellino, pnr - pannier, chif - chiffon, p - pink, Oamb - octopamine receptor in mushroom bodies, s
GO:0048260	1.2e-05	positive regulation of receptor-mediated endocytosis	1.2e-05	0.000355	3.05	7301	14	2054	12	[Hip1 - huntingtin interacting protein 1, comm - commissureless, Cad99C - cadherin 99c, Graf - cg8948 gene product from transcript cg8948-rb, norpA - no receptor potential a, lap - like-ap180, BicD - bicaudal d, cindr - cin85 and cd2ap ort
GO:0001654	1.2e-05	eye development	1.2e-05	0.000355	1.76	7301	91	2054	45	[a - arc, Egfr - epidermal growth factor receptor, mam - mastermind, scrib - scribbled, bchs - blue cheese, Gp150 - cg5820 gene product from transcript cg5820-ra, Nc - nedd2-like caspase, Abl - abl tyrosine kinase, jumu - jumeau, neur -
GO:0007399	1.29e-05	nervous system development	1.29e-05	0.000377	1.96	7301	58	2054	32	[tou - toutatis, sick - sickie, mam - mastermind, drl - derailed, Atf3 - activating transcription factor 3, oc - ocelliless, Acsl - acyl-coa synthetase long-chain, dlg1 - discs large 1, fog - folded gastrulation, crb - crumbs, neur -
GO:0006468	1.34e-05	protein phosphorylation	1.34e-05	0.000392	1.53	7301	174	2054	75	[grp - grapes, wee - cg4488 gene product from transcript cg4488-rb, CG4839 - cg4839 gene product from transcript cg4839-ra, gwl - greatwall, Stlk - ste20-like kinase, Atg1 - autophagy-specific gene 1, Eip63E - ecdysone-induced protein 63e, s
GO:0007292	1.35e-05	female gamete generation	1.35e-05	0.000392	1.68	7301	110	2054	52	[EcR - ecdysone receptor, Atg7 - autophagy-specific gene 7, retn - retained, CG9634 - cg9634 gene product from transcript cg9634-ra, pea - peanuts, egg - eggless, neb - nebbish, cact - cactus, ari-1 - ariadne, mdy - midway, Sxl - sex
GO:0010647	1.41e-05	positive regulation of cell communication	1.41e-05	0.000407	1.45	7301	241	2054	98	[GNBP1 - gram-negative bacteria binding protein 1, dlp - dally-like, CG4853 - cg4853 gene product from transcript cg4853-ra, trio - cg18214 gene product from transcript cg18214-ra, rdx - roadkill, Tequila - cg4821 gene product from transcript
GO:0023056	1.41e-05	positive regulation of signaling	1.41e-05	0.000405	1.45	7301	241	2054	98	[GNBP1 - gram-negative bacteria binding protein 1, dlp - dally-like, CG4853 - cg4853 gene product from transcript cg4853-ra, trio - cg18214 gene product from transcript cg18214-ra, rdx - roadkill, Tequila - cg4821 gene product from transcript
GO:0031325	1.42e-05	positive regulation of cellular metabolic process	1.42e-05	0.000406	1.32	7301	454	2054	168	[Cyt-c-d - cytochrome c distal, egg - eggless, Mdh2 - malate dehydrogenase 2, Rpt6R - cg2241 gene product from transcript cg2241-ra, Pli - pellino, pnr - pannier, chif - chiffon, cact - cactus, Oamb - octopamine receptor in mushroom bodi
GO:0051130	1.47e-05	positive regulation of cellular component organization	1.47e-05	0.000421	1.55	7301	163	2054	71	[Nipped-B - cg17704 gene product from transcript cg17704-rg, Hip1 - huntingtin interacting protein 1, Syt1 - synaptotagmin 1, Ank2 - ankyrin 2, egg - eggless, cac - cacophony, lap - like-ap180, wdp - windpipe, nudC - cg9710 gene product
GO:0007528	1.5e-05	neuromuscular junction development	1.5e-05	0.000426	2.02	7301	51	2054	29	[Ank2 - ankyrin 2, Frq1 - frequenin 1, Ca-beta - ca2+-channel-protein-beta-subunit, cmpy - crimpy, Atpalpha - na pump alpha subunit, dlg1 - discs large 1, dlp - dally-like, Atg1 - autophagy-specific gene 1, neuroligin - cg13772 gene prod
GO:0035223	1.53e-05	leg disc pattern formation	1.53e-05	0.000433	2.89	7301	16	2054	13	[rl - rolled, H15 - cg6604 gene product from transcript cg6604-ra, mid - midline, ru - roughoid, Egfr - epidermal growth factor receptor, vn - vein, rho - rhomboid, jing - cg9397 gene product from transcript cg9397-ri, hth - homothorax,
GO:0007449	1.53e-05	proximal/distal pattern formation, imaginal disc	1.53e-05	0.000431	2.89	7301	16	2054	13	[rl - rolled, ru - roughoid, Egfr - epidermal growth factor receptor, hh - hedgehog, vn - vein, rho - rhomboid, jing - cg9397 gene product from transcript cg9397-ri, hth - homothorax, dpp - decapentaplegic, Lim1 - cg11354 gene product
GO:0045807	1.55e-05	positive regulation of endocytosis	1.55e-05	0.000437	2.46	7301	26	2054	18	[Hip1 - huntingtin interacting protein 1, comm - commissureless, numb - cg3779 gene product from transcript cg3779-rb, Cad99C - cadherin 99c, Graf - cg8948 gene product from transcript cg8948-rb, norpA - no receptor potential a, lap - like-a
GO:0007417	1.6e-05	central nervous system development	1.6e-05	0.000448	1.97	7301	56	2054	31	[kuz - kuzbanian, mid - midline, rib - ribbon, sr - stripe, ct - cut, numb - cg3779 gene product from transcript cg3779-rb, oc - ocelliless, Pex1 - peroxin 1, Nc - nedd2-like caspase, Abl - abl tyrosine kinase, raw - cg12437 gene pro
GO:0001736	1.62e-05	establishment of planar polarity	1.62e-05	0.000452	2.1	7301	44	2054	26	[d - dachs, fw - furrowed, app - approximated, scrib - scribbled, fz - frizzled, puc - puckered, nmo - nemo, sano - serrano, fy - fuzzy, hbs - hibris, N - notch, rdx - roadkill, pk - prickle, Shroom - cg34379 gene product from
GO:0007164	1.62e-05	establishment of tissue polarity	1.62e-05	0.00045	2.1	7301	44	2054	26	[d - dachs, app - approximated, fw - furrowed, scrib - scribbled, fz - frizzled, nmo - nemo, puc - puckered, sano - serrano, fy - fuzzy, hbs - hibris, N - notch, rdx - roadkill, pk - prickle, Shroom - cg34379 gene product from
GO:0007424	1.64e-05	open tracheal system development	1.64e-05	0.000453	1.88	7301	66	2054	35	[dp - dumpy, rib - ribbon, ct - cut, Mmp2 - matrix metalloproteinase 2, Src64B - src oncogene at 64b, vri - vrille, elB - elbow b, crb - crumbs, Mmp1 - matrix metalloproteinase 1, tkv - thickveins, bnl - branchless, shot - short st
GO:0060541	1.64e-05	respiratory system development	1.64e-05	0.000451	1.88	7301	66	2054	35	[dp - dumpy, rib - ribbon, ct - cut, Mmp2 - matrix metalloproteinase 2, Src64B - src oncogene at 64b, vri - vrille, elB - elbow b, crb - crumbs, Mmp1 - matrix metalloproteinase 1, tkv - thickveins, bnl - branchless, shot - short st
GO:0019725	1.69e-05	cellular homeostasis	1.69e-05	0.000463	1.59	7301	141	2054	63	[Dys - dystrophin, Ank2 - ankyrin 2, trpgamma - cg5996 gene product from transcript cg5996-rd, cac - cacophony, Rab14 - cg4212 gene product from transcript cg4212-ra, CG12206 - cg12206 gene product from transcript cg12206-ra, CG33988 - cg339
GO:0051017	1.72e-05	actin filament bundle assembly	1.72e-05	0.00047	2.76	7301	18	2054	14	[sn - singed, Sb - stubble, Fim - fimbrin, Src64B - src oncogene at 64b, Fps85D - fps oncogene analog, Rho1 - cg8416 gene product from transcript cg8416-rb, jvl - javelin-like, hts - hu li tai shao, jv - javelin, CG32082 - cg32082 gene
GO:0010720	1.72e-05	positive regulation of cell development	1.72e-05	0.000468	1.74	7301	92	2054	45	[EcR - ecdysone receptor, Gap1 - gtpase-activating protein 1, kuz - kuzbanian, rl - rolled, Egfr - epidermal growth factor receptor, phl - pole hole, grk - gurken, oc - ocelliless, Src64B - src oncogene at 64b, nudC - cg9710 gene produ
GO:0050801	1.73e-05	ion homeostasis	1.73e-05	0.000469	1.71	7301	100	2054	48	[Mco1 - multicopper oxidase-1, phl - pole hole, trpgamma - cg5996 gene product from transcript cg5996-rd, norpA - no receptor potential a, SPoCk - secretory pathway calcium atpase, cac - cacophony, Atpalpha - na pump alpha subunit, scaf6 -
GO:1901185	1.77e-05	negative regulation of ERBB signaling pathway	1.77e-05	0.000478	2.59	7301	22	2054	16	[Gap1 - gtpase-activating protein 1, Pi3K68D - phosphotidylinositol 3 kinase 68d, Mkp3 - mitogen-activated protein kinase phosphatase 3, pum - pumilio, Graf - cg8948 gene product from transcript cg8948-rb, Ptp4E - protein tyrosine phosphatase
GO:0042059	1.77e-05	negative regulation of epidermal growth factor receptor signaling pathway	1.77e-05	0.000476	2.59	7301	22	2054	16	[Gap1 - gtpase-activating protein 1, Pi3K68D - phosphotidylinositol 3 kinase 68d, Mkp3 - mitogen-activated protein kinase phosphatase 3, pum - pumilio, Graf - cg8948 gene product from transcript cg8948-rb, Ptp4E - protein tyrosine phosphatase
GO:0007163	2.17e-05	establishment or maintenance of cell polarity	2.17e-05	0.000581	1.7	7301	98	2054	47	[sn - singed, d - dachs, Egfr - epidermal growth factor receptor, phl - pole hole, Dys - dystrophin, fw - furrowed, rib - ribbon, scrib - scribbled, sdt - stardust, grk - gurken, cora - coracle, dlg1 - discs large 1, BicD - bicau
GO:0048477	2.32e-05	oogenesis	2.32e-05	0.000619	1.66	7301	109	2054	51	[EcR - ecdysone receptor, Atg7 - autophagy-specific gene 7, retn - retained, CG9634 - cg9634 gene product from transcript cg9634-ra, pea - peanuts, egg - eggless, neb - nebbish, cact - cactus, ari-1 - ariadne, mdy - midway, Sxl - sex
GO:0051963	2.4e-05	regulation of synapse assembly	2.4e-05	0.000637	1.83	7301	72	2054	37	[brat - brain tumor, Ank2 - ankyrin 2, pum - pumilio, cac - cacophony, Acsl - acyl-coa synthetase long-chain, Src64B - src oncogene at 64b, dlg1 - discs large 1, Abl - abl tyrosine kinase, dysc - dyschronic, hiw - highwire, Fas2 - fa
GO:0048749	2.62e-05	compound eye development	2.62e-05	0.000692	1.78	7301	80	2054	40	[a - arc, Egfr - epidermal growth factor receptor, mam - mastermind, scrib - scribbled, bchs - blue cheese, Gp150 - cg5820 gene product from transcript cg5820-ra, Nc - nedd2-like caspase, jumu - jumeau, Abl - abl tyrosine kinase, neur -
GO:0051302	3e-05	regulation of cell division	3e-05	0.00079	2.33	7301	29	2054	19	[Egfr - epidermal growth factor receptor, CHES-1-like - checkpoint suppressor homologue, numb - cg3779 gene product from transcript cg3779-rb, Pkn - protein kinase related to protein kinase n, sti - sticky, Mrtf - myocardin-related transcripti
GO:0045597	3.02e-05	positive regulation of cell differentiation	3.02e-05	0.000793	1.69	7301	99	2054	47	[kuz - kuzbanian, Gap1 - gtpase-activating protein 1, EcR - ecdysone receptor, rl - rolled, Egfr - epidermal growth factor receptor, phl - pole hole, grk - gurken, oc - ocelliless, Src64B - src oncogene at 64b, nudC - cg9710 gene produ
GO:0050807	3.06e-05	regulation of synapse organization	3.06e-05	0.000801	1.72	7301	91	2054	44	[brat - brain tumor, Ank2 - ankyrin 2, pum - pumilio, cac - cacophony, CG14521 - cg14521 gene product from transcript cg14521-ra, bchs - blue cheese, Acsl - acyl-coa synthetase long-chain, dlg1 - discs large 1, Src64B - src oncogene at 6
GO:0007187	3.09e-05	G protein-coupled receptor signaling pathway, coupled to cyclic nucleotide second messenger	3.09e-05	0.000804	1.99	7301	50	2054	28	[CG34411 - cg34411 gene product from transcript cg34411-rb, 5-HT2 - serotonin receptor 2, cta - concertina, DmsR-2 - dromyosuppressin receptor 2, Dh31 - diuretic hormone 31, 5-HT1A - serotonin receptor 1a, TyrR - tyramine receptor, D2R - d
GO:0009628	3.15e-05	response to abiotic stimulus	3.15e-05	0.000816	1.41	7301	254	2054	101	[inaE - inactivation no afterpotential e, grp - grapes, Gyc-89Db - guanylyl cyclase at 89db, Gyc-89Da - guanylyl cyclase at 89da, trpgamma - cg5996 gene product from transcript cg5996-rd, lap - like-ap180, eys - eyes shut, CG34353 - cg3435
GO:0060627	3.16e-05	regulation of vesicle-mediated transport	3.16e-05	0.000816	1.86	7301	65	2054	34	[Hip1 - huntingtin interacting protein 1, brat - brain tumor, Syt1 - synaptotagmin 1, scrib - scribbled, numb - cg3779 gene product from transcript cg3779-rb, step - steppke, norpA - no receptor potential a, lap - like-ap180, wdp - windp
GO:0000122	3.16e-05	negative regulation of transcription by RNA polymerase II	3.16e-05	0.000813	1.65	7301	110	2054	51	[EcR - ecdysone receptor, retn - retained, en - engrailed, scrib - scribbled, Vsx2 - visual system homeobox 2 ortholog, oc - ocelliless, dve - defective proventriculus, scrt - scratch, pnr - pannier, dar1 - dendritic arbor reduction 1,
GO:0055080	3.42e-05	cation homeostasis	3.42e-05	0.000877	1.7	7301	94	2054	45	[Mco1 - multicopper oxidase-1, phl - pole hole, norpA - no receptor potential a, cac - cacophony, trpgamma - cg5996 gene product from transcript cg5996-rd, SPoCk - secretory pathway calcium atpase, Atpalpha - na pump alpha subunit, scaf6 -
GO:0048565	3.44e-05	digestive tract development	3.44e-05	0.000878	2.37	7301	27	2054	18	[if - inflated, dve - defective proventriculus, drm - drumstick, Scr - sex combs reduced, IA-2 - ia-2 ortholog, Ubx - ultrabithorax, byn - brachyenteron, pnr - pannier, vn - vein, Alk - cg8250 gene product from transcript cg8250-rb, An
GO:0043900	3.64e-05	regulation of multi-organism process	3.64e-05	0.000925	1.66	7301	105	2054	49	[EcR - ecdysone receptor, Atg7 - autophagy-specific gene 7, Syt1 - synaptotagmin 1, grk - gurken, Pli - pellino, Atg1 - autophagy-specific gene 1, pnr - pannier, Parp - poly-(adp-ribose) polymerase, cact - cactus, Cbp80 - cap binding p
GO:0007522	3.69e-05	visceral muscle development	3.69e-05	0.000937	3.01	7301	13	2054	11	[ths - thisbe, mbc - myoblast city, Vrp1 - verprolin 1, Msp-300 - muscle-specific protein 300, Alk - cg8250 gene product from transcript cg8250-rb, jeb - jelly belly, klar - klarsicht, sls - sallimus, pyr - pyramus, kirre - kin of irre
GO:0051173	3.76e-05	positive regulation of nitrogen compound metabolic process	3.76e-05	0.00095	1.3	7301	439	2054	161	[Cyt-c-d - cytochrome c distal, egg - eggless, Mdh2 - malate dehydrogenase 2, Rpt6R - cg2241 gene product from transcript cg2241-ra, Pli - pellino, pnr - pannier, chif - chiffon, cact - cactus, Oamb - octopamine receptor in mushroom bodi
GO:0007157	3.88e-05	heterophilic cell-cell adhesion via plasma membrane cell adhesion molecules	3.88e-05	0.000977	2.42	7301	25	2054	17	[beat-VI - cg14064 gene product from transcript cg14064-rb, beat-IIIc - cg15138 gene product from transcript cg15138-ra, beat-IIa - beaten path iia, if - inflated, beat-IIb - cg4135 gene product from transcript cg4135-rb, betaInt-nu - beta[nu]
GO:0040036	3.89e-05	regulation of fibroblast growth factor receptor signaling pathway	3.89e-05	0.000974	3.55	7301	8	2054	8	[vap - vacuolar peduncle, dally - division abnormally delayed, Mmp2 - matrix metalloproteinase 2, CG8965 - cg8965 gene product from transcript cg8965-ra, sty - sprouty, Src64B - src oncogene at 64b, sxc - super sex combs, dlp - dally-like]
GO:0007432	3.89e-05	salivary gland boundary specification	3.89e-05	0.000971	3.55	7301	8	2054	8	[fra - frazzled, lea - leak, sli - slit, hth - homothorax, NetB - netrin-b, Scr - sex combs reduced, mew - multiple edematous wings, unc-5 - cg8166 gene product from transcript cg8166-ra]
GO:0002066	4.02e-05	columnar/cuboidal epithelial cell development	4.02e-05	0.001	1.94	7301	53	2054	29	[mam - mastermind, hh - hedgehog, ct - cut, scrib - scribbled, dlg1 - discs large 1, neur - neuralized, bib - big brain, l(2)35Bg - lethal (2) 35bg, tkv - thickveins, bun - bunched, neb - nebbish, egh - egghead, puc - puckered, e
GO:0030707	4.02e-05	ovarian follicle cell development	4.02e-05	0.000997	1.94	7301	53	2054	29	[mam - mastermind, hh - hedgehog, ct - cut, scrib - scribbled, dlg1 - discs large 1, neur - neuralized, bib - big brain, l(2)35Bg - lethal (2) 35bg, tkv - thickveins, bun - bunched, neb - nebbish, egh - egghead, puc - puckered, e
GO:0050770	4.24e-05	regulation of axonogenesis	4.24e-05	0.00105	2.2	7301	34	2054	21	[kuz - kuzbanian, Dscam - down syndrome cell adhesion molecule, pk - prickle, Sema-2a - cg4700 gene product from transcript cg4700-rc, stan - starry night, fz - frizzled, Rho1 - cg8416 gene product from transcript cg8416-rb, pbl - pebble,
GO:0007189	4.24e-05	adenylate cyclase-activating G protein-coupled receptor signaling pathway	4.24e-05	0.00104	2.2	7301	34	2054	21	[CG34411 - cg34411 gene product from transcript cg34411-rb, Ac76E - adenylyl cyclase 76e, CG15556 - cg15556 gene product from transcript cg15556-ra, Oct-TyrR - octopamine-tyramine receptor, Octbeta2R - cg33976 gene product from transcript cg3397
GO:0045214	4.3e-05	sarcomere organization	4.3e-05	0.00105	2.47	7301	23	2054	16	[if - inflated, sls - sallimus, bt - bent, tw - protein o-mannosyltransferase 2, Dg - dystroglycan, hts - hu li tai shao, cher - cheerio, Mical - molecule interacting with casl, Mhc - myosin heavy chain, up - upheld, Bsg - basigin, C
GO:0000902	4.76e-05	cell morphogenesis	4.76e-05	0.00116	1.75	7301	79	2054	39	[cenB1A - centaurin beta 1a, ct - cut, hh - hedgehog, if - inflated, scrib - scribbled, eys - eyes shut, crb - crumbs, Abl - abl tyrosine kinase, raw - cg12437 gene product from transcript cg12437-rb, pan - pangolin, tkv - thickveins
GO:0048859	4.82e-05	formation of anatomical boundary	4.82e-05	0.00117	2.72	7301	17	2054	13	[ct - cut, mirr - mirror, Scr - sex combs reduced, dally - division abnormally delayed, fra - frazzled, lea - leak, ena - enabled, sli - slit, hth - homothorax, NetB - netrin-b, mew - multiple edematous wings, unc-5 - cg8166 gene p
GO:0071805	5.07e-05	potassium ion transmembrane transport	5.07e-05	0.00123	2.22	7301	32	2054	20	[CG33310 - cg33310 gene product from transcript cg33310-ra, Task6 - cg9637 gene product from transcript cg9637-rd, Shab - shaker cognate b, Atpalpha - na pump alpha subunit, SK - small conductance calcium-activated potassium channel, CG1688 -
GO:0071804	5.07e-05	cellular potassium ion transport	5.07e-05	0.00123	2.22	7301	32	2054	20	[CG33310 - cg33310 gene product from transcript cg33310-ra, Task6 - cg9637 gene product from transcript cg9637-rd, Shab - shaker cognate b, Atpalpha - na pump alpha subunit, SK - small conductance calcium-activated potassium channel, CG1688 -
GO:0007281	5.22e-05	germ cell development	5.22e-05	0.00126	1.53	7301	151	2054	65	[EcR - ecdysone receptor, Atg7 - autophagy-specific gene 7, retn - retained, CG9634 - cg9634 gene product from transcript cg9634-ra, pea - peanuts, egg - eggless, aly - always early, neb - nebbish, gcl - germ cell-less, elav - embryoni
GO:0045935	5.36e-05	positive regulation of nucleobase-containing compound metabolic process	5.36e-05	0.00129	1.38	7301	281	2054	109	[egg - eggless, Rpt6R - cg2241 gene product from transcript cg2241-ra, pnr - pannier, chif - chiffon, ss - spineless, vnd - ventral nervous system defective, Abd-B - abdominal b, N - notch, nau - nautilus, CG43444 - cg43444 gene produc
GO:1904396	5.64e-05	regulation of neuromuscular junction development	5.64e-05	0.00135	1.8	7301	69	2054	35	[brat - brain tumor, Ank2 - ankyrin 2, pum - pumilio, cac - cacophony, CG14521 - cg14521 gene product from transcript cg14521-ra, Acsl - acyl-coa synthetase long-chain, Src64B - src oncogene at 64b, dlg1 - discs large 1, Abl - abl tyrosi
GO:1905879	5.91e-05	regulation of oogenesis	5.91e-05	0.00141	2.02	7301	44	2054	25	[kuz - kuzbanian, enc - encore, Egfr - epidermal growth factor receptor, Syt1 - synaptotagmin 1, spn-E - spindle e, grk - gurken, cnc - cap-n-collar, dlg1 - discs large 1, Atg1 - autophagy-specific gene 1, vn - vein, Tie - tie-like r
GO:0098771	5.96e-05	inorganic ion homeostasis	5.96e-05	0.00142	1.68	7301	93	2054	44	[Mco1 - multicopper oxidase-1, phl - pole hole, SPoCk - secretory pathway calcium atpase, trpgamma - cg5996 gene product from transcript cg5996-rd, cac - cacophony, norpA - no receptor potential a, Atpalpha - na pump alpha subunit, scaf6 -
GO:0051253	6.1e-05	negative regulation of RNA metabolic process	6.1e-05	0.00144	1.45	7301	201	2054	82	[EcR - ecdysone receptor, en - engrailed, retn - retained, scrib - scribbled, Vsx2 - visual system homeobox 2 ortholog, egg - eggless, oc - ocelliless, AGO1 - argonaute-1, dve - defective proventriculus, scrt - scratch, pan - pangoli
GO:0002064	6.26e-05	epithelial cell development	6.26e-05	0.00148	1.87	7301	59	2054	31	[mam - mastermind, hh - hedgehog, ct - cut, scrib - scribbled, dlg1 - discs large 1, neur - neuralized, loco - locomotion defects, bib - big brain, l(2)35Bg - lethal (2) 35bg, tkv - thickveins, bun - bunched, neb - nebbish, egh -
GO:0048663	6.4e-05	neuron fate commitment	6.4e-05	0.0015	2.11	7301	37	2054	22	[ast - asteroid, rl - rolled, ru - roughoid, phl - pole hole, scrib - scribbled, svp - seven up, oc - ocelliless, stan - starry night, fz - frizzled, elB - elbow b, klg - klingon, rho - rhomboid, msi - musashi, hth - homothorax
GO:0046552	6.4e-05	photoreceptor cell fate commitment	6.4e-05	0.0015	2.11	7301	37	2054	22	[ast - asteroid, rl - rolled, ru - roughoid, phl - pole hole, svp - seven up, scrib - scribbled, oc - ocelliless, stan - starry night, elB - elbow b, fz - frizzled, klg - klingon, rho - rhomboid, msi - musashi, hth - homothorax
GO:0007444	6.77e-05	imaginal disc development	6.77e-05	0.00158	1.7	7301	88	2054	42	[d - dachs, grp - grapes, Egfr - epidermal growth factor receptor, hh - hedgehog, en - engrailed, bowl - brother of odd with entrails limited, dsx - doublesex, elB - elbow b, B4 - cg9239 gene product from transcript cg9239-rc, pico - c
GO:0051961	6.8e-05	negative regulation of nervous system development	6.8e-05	0.00158	1.73	7301	80	2054	39	[EcR - ecdysone receptor, Gap1 - gtpase-activating protein 1, brat - brain tumor, numb - cg3779 gene product from transcript cg3779-rb, Acsl - acyl-coa synthetase long-chain, Src64B - src oncogene at 64b, Abl - abl tyrosine kinase, hiw - h
GO:0008582	7.09e-05	regulation of synaptic growth at neuromuscular junction	7.09e-05	0.00164	1.8	7301	67	2054	34	[brat - brain tumor, Ank2 - ankyrin 2, pum - pumilio, cac - cacophony, Acsl - acyl-coa synthetase long-chain, Src64B - src oncogene at 64b, dlg1 - discs large 1, Abl - abl tyrosine kinase, dysc - dyschronic, hiw - highwire, Fas2 - fa
GO:0008355	7.1e-05	olfactory learning	7.1e-05	0.00164	2.29	7301	28	2054	18	[Egfr - epidermal growth factor receptor, drl - derailed, prt - portabella, mnb - minibrain, dnc - dunce, sgg - shaggy, vn - vein, chico - cg5686 gene product from transcript cg5686-rb, Pka-R1 - camp-dependent protein kinase r1, gish -
GO:0042749	7.1e-05	regulation of circadian sleep/wake cycle	7.1e-05	0.00163	2.29	7301	28	2054	18	[EcR - ecdysone receptor, Hk - hyperkinetic, Ih - i[[h]] channel, Shab - shaker cognate b, CG7433 - cg7433 gene product from transcript cg7433-rc, Hsp83 - heat shock protein 83, Dh31 - diuretic hormone 31, 5-HT1A - serotonin receptor 1a, C
GO:0048588	7.32e-05	developmental cell growth	7.32e-05	0.00168	2.03	7301	42	2054	24	[Dscam - down syndrome cell adhesion molecule, hdc - headcase, Ank2 - ankyrin 2, fz - frizzled, path - pathetic, dnc - dunce, chico - cg5686 gene product from transcript cg5686-rb, Nup154 - nucleoporin 154, eag - ether a go-go, rut - r
GO:0045934	7.73e-05	negative regulation of nucleobase-containing compound metabolic process	7.73e-05	0.00177	1.43	7301	214	2054	86	[EcR - ecdysone receptor, en - engrailed, retn - retained, scrib - scribbled, Vsx2 - visual system homeobox 2 ortholog, egg - eggless, oc - ocelliless, AGO1 - argonaute-1, spel1 - spellchecker1, dve - defective proventriculus, scrt -
GO:0043269	7.81e-05	regulation of ion transport	7.81e-05	0.00178	2.13	7301	35	2054	21	[capaR - capa receptor, Syt1 - synaptotagmin 1, Rgk3 - cg34397 gene product from transcript cg34397-rd, Ih - i[[h]] channel, Ent2 - equilibrative nucleoside transporter 2, Teh4 - tipe homolog 4, Ca-beta - ca2+-channel-protein-beta-subunit, c
GO:0007480	7.81e-05	imaginal disc-derived leg morphogenesis	7.81e-05	0.00177	2.13	7301	35	2054	21	[RhoGAP19D - cg1412 gene product from transcript cg1412-rb, Gef64C - guanine nucleotide exchange factor gef64c, bowl - brother of odd with entrails limited, GEFmeso - guanine nucleotide exchange factor in mesoderm, CG43658 - cg43658 gene product
GO:0007188	7.83e-05	adenylate cyclase-modulating G protein-coupled receptor signaling pathway	7.83e-05	0.00177	1.97	7301	47	2054	26	[CG34411 - cg34411 gene product from transcript cg34411-rb, cta - concertina, DmsR-2 - dromyosuppressin receptor 2, Dh31 - diuretic hormone 31, 5-HT1A - serotonin receptor 1a, TyrR - tyramine receptor, D2R - dopamine 2-like receptor, Pdfr -
GO:0045216	7.87e-05	cell-cell junction organization	7.87e-05	0.00177	1.87	7301	57	2054	30	[p120ctn - adherens junction protein p120, scrib - scribbled, Mmp2 - matrix metalloproteinase 2, sdt - stardust, CG14521 - cg14521 gene product from transcript cg14521-ra, cora - coracle, Atpalpha - na pump alpha subunit, dlg1 - discs larg
GO:0010160	8.15e-05	formation of animal organ boundary	8.15e-05	0.00183	3.2	7301	10	2054	9	[lea - leak, fra - frazzled, dally - division abnormally delayed, sli - slit, hth - homothorax, NetB - netrin-b, Scr - sex combs reduced, mew - multiple edematous wings, unc-5 - cg8166 gene product from transcript cg8166-ra]
GO:0007414	8.15e-05	axonal defasciculation	8.15e-05	0.00183	3.2	7301	10	2054	9	[if - inflated, tutl - turtle, Ptp99A - protein tyrosine phosphatase 99a, Ptp69D - protein tyrosine phosphatase 69d, beat-Ic - beaten path ic, tok - tolkin, mew - multiple edematous wings, beat-Ia - beaten path ia, pbl - pebble]
GO:0045927	8.26e-05	positive regulation of growth	8.26e-05	0.00184	1.78	7301	70	2054	35	[d - dachs, Nipped-B - cg17704 gene product from transcript cg17704-rg, Egfr - epidermal growth factor receptor, Ank2 - ankyrin 2, cac - cacophony, step - steppke, bchs - blue cheese, dlg1 - discs large 1, fz - frizzled, pico - cg11940
GO:1990138	8.28e-05	neuron projection extension	8.28e-05	0.00184	2.32	7301	26	2054	17	[Dscam - down syndrome cell adhesion molecule, hdc - headcase, Ank2 - ankyrin 2, fz - frizzled, dnc - dunce, path - pathetic, rut - rutabaga, Sh - shaker, Mbs - myosin binding subunit, CadN - cadherin-n, fz2 - frizzled 2, tai - tai
GO:0048675	9.54e-05	axon extension	9.54e-05	0.00212	2.37	7301	24	2054	16	[Dscam - down syndrome cell adhesion molecule, hdc - headcase, Ank2 - ankyrin 2, fz - frizzled, dnc - dunce, rut - rutabaga, Sh - shaker, Mbs - myosin binding subunit, CadN - cadherin-n, fz2 - frizzled 2, tai - taiman, Ptpmeg - cg1
GO:1902531	9.55e-05	regulation of intracellular signal transduction	9.55e-05	0.00211	1.4	7301	233	2054	92	[d - dachs, scrib - scribbled, Gef64C - guanine nucleotide exchange factor gef64c, wdp - windpipe, CG17494 - cg17494 gene product from transcript cg17494-ra, GEFmeso - guanine nucleotide exchange factor in mesoderm, dnc - dunce, Atg1 - aut
GO:0007560	9.76e-05	imaginal disc morphogenesis	9.76e-05	0.00215	1.97	7301	45	2054	25	[EcR - ecdysone receptor, Timp - tissue inhibitor of metalloproteases, Egfr - epidermal growth factor receptor, en - engrailed, phl - pole hole, hh - hedgehog, bi - bifid, scrib - scribbled, fog - folded gastrulation, bab1 - bric a bra
GO:0048563	9.88e-05	post-embryonic animal organ morphogenesis	9.88e-05	0.00217	1.87	7301	55	2054	29	[EcR - ecdysone receptor, Timp - tissue inhibitor of metalloproteases, Egfr - epidermal growth factor receptor, en - engrailed, phl - pole hole, hh - hedgehog, scrib - scribbled, bi - bifid, bab1 - bric a brac 1, fog - folded gastrulat
GO:0048639	9.88e-05	positive regulation of developmental growth	9.88e-05	0.00217	1.87	7301	55	2054	29	[d - dachs, Egfr - epidermal growth factor receptor, Ank2 - ankyrin 2, cac - cacophony, step - steppke, bchs - blue cheese, dlg1 - discs large 1, fz - frizzled, pico - cg11940 gene product from transcript cg11940-rb, tkv - thickveins,
GO:0034330	0.000104	cell junction organization	0.000104	0.00227	1.78	7301	68	2054	34	[rl - rolled, p120ctn - adherens junction protein p120, scrib - scribbled, Mmp2 - matrix metalloproteinase 2, sdt - stardust, CG14521 - cg14521 gene product from transcript cg14521-ra, Atpalpha - na pump alpha subunit, cora - coracle, dlg1
GO:1902679	0.000107	negative regulation of RNA biosynthetic process	0.000107	0.00233	1.45	7301	189	2054	77	[EcR - ecdysone receptor, retn - retained, en - engrailed, scrib - scribbled, egg - eggless, Vsx2 - visual system homeobox 2 ortholog, AGO1 - argonaute-1, oc - ocelliless, dve - defective proventriculus, scrt - scratch, pan - pangoli
GO:0045892	0.000107	negative regulation of transcription, DNA-templated	0.000107	0.00232	1.45	7301	189	2054	77	[EcR - ecdysone receptor, retn - retained, en - engrailed, scrib - scribbled, egg - eggless, Vsx2 - visual system homeobox 2 ortholog, AGO1 - argonaute-1, oc - ocelliless, dve - defective proventriculus, scrt - scratch, pan - pangoli
GO:1903507	0.000107	negative regulation of nucleic acid-templated transcription	0.000107	0.00231	1.45	7301	189	2054	77	[EcR - ecdysone receptor, en - engrailed, retn - retained, scrib - scribbled, egg - eggless, Vsx2 - visual system homeobox 2 ortholog, oc - ocelliless, AGO1 - argonaute-1, dve - defective proventriculus, scrt - scratch, pan - pangoli
GO:0022607	0.000107	cellular component assembly	0.000107	0.00231	1.26	7301	507	2054	180	[grp - grapes, CG7993 - cg7993 gene product from transcript cg7993-ra, wee - cg4488 gene product from transcript cg4488-rb, if - inflated, scrib - scribbled, clos - closca, sdt - stardust, lap - like-ap180, CG6053 - cg6053 gene product f
GO:0060341	0.000107	regulation of cellular localization	0.000107	0.00231	1.73	7301	76	2054	37	[Nipped-B - cg17704 gene product from transcript cg17704-rg, enc - encore, brat - brain tumor, Syt1 - synaptotagmin 1, Dys - dystrophin, nemy - no extended memory, spn-E - spindle e, Nup358 - nucleoporin 358, hh - hedgehog, Nup214 - nu
GO:0007479	0.000112	leg disc proximal/distal pattern formation	0.000112	0.0024	2.96	7301	12	2054	10	[rho - rhomboid, rl - rolled, jing - cg9397 gene product from transcript cg9397-ri, Egfr - epidermal growth factor receptor, ru - roughoid, hth - homothorax, Lim1 - cg11354 gene product from transcript cg11354-rb, dpp - decapentaplegic, vn
GO:0061572	0.00012	actin filament bundle organization	0.00012	0.00256	2.49	7301	20	2054	14	[sn - singed, Sb - stubble, Fim - fimbrin, Src64B - src oncogene at 64b, Fps85D - fps oncogene analog, Rho1 - cg8416 gene product from transcript cg8416-rb, jvl - javelin-like, hts - hu li tai shao, jv - javelin, CG32082 - cg32082 gene
GO:0051124	0.00012	synaptic growth at neuromuscular junction	0.00012	0.00255	2.49	7301	20	2054	14	[Ten-m - tenascin major, Atpalpha - na pump alpha subunit, cpx - complexin, dlg1 - discs large 1, neuroligin - cg13772 gene product from transcript cg13772-rb, Atg1 - autophagy-specific gene 1, sgg - shaggy, Pdk1 - phosphoinositide-depende
GO:0007275	0.000121	multicellular organism development	0.000121	0.00256	1.63	7301	98	2054	45	[EcR - ecdysone receptor, rl - rolled, grp - grapes, Egfr - epidermal growth factor receptor, wee - cg4488 gene product from transcript cg4488-rb, phl - pole hole, step - steppke, Mdh2 - malate dehydrogenase 2, cora - coracle, oc - oce
GO:0007474	0.000122	imaginal disc-derived wing vein specification	0.000122	0.00258	1.98	7301	43	2054	24	[sfl - sulfateless, rl - rolled, corto - cg2530 gene product from transcript cg2530-rc, inv - invected, Egfr - epidermal growth factor receptor, hh - hedgehog, Dys - dystrophin, en - engrailed, phl - pole hole, Mkp3 - mitogen-activated
GO:0034220	0.000125	ion transmembrane transport	0.000125	0.00264	1.46	7301	178	2054	73	[CG12531 - cg12531 gene product from transcript cg12531-ra, Task6 - cg9637 gene product from transcript cg9637-rd, trpgamma - cg5996 gene product from transcript cg5996-rd, cac - cacophony, SK - small conductance calcium-activated potassium chan
GO:0046716	0.000128	muscle cell cellular homeostasis	0.000128	0.0027	2.79	7301	14	2054	11	[dysc - dyschronic, chif - chiffon, betaInt-nu - beta[nu] integrin, uif - uninflatable, Dys - dystrophin, up - upheld, SP2353 - cg8403 gene product from transcript cg8403-ra, Fkbp13 - cg9847 gene product from transcript cg9847-rc, CG11148
GO:0035277	0.000133	spiracle morphogenesis, open tracheal system	0.000133	0.00278	2.67	7301	16	2054	12	[spi - spitz, Egfr - epidermal growth factor receptor, hh - hedgehog, en - engrailed, Trf2 - tata box binding protein-related factor 2, ct - cut, RhoGEF2 - cg9635 gene product from transcript cg9635-rf, Gef64C - guanine nucleotide exchange
GO:0002682	0.000137	regulation of immune system process	0.000137	0.00287	1.48	7301	158	2054	66	[EcR - ecdysone receptor, Atg7 - autophagy-specific gene 7, Mmp2 - matrix metalloproteinase 2, GNBP1 - gram-negative bacteria binding protein 1, fz - frizzled, GNBP2 - gram-negative bacteria binding protein 2, Pli - pellino, pan - pangolin
GO:0009967	0.000138	positive regulation of signal transduction	0.000138	0.00287	1.4	7301	223	2054	88	[svp - seven up, Gef64C - guanine nucleotide exchange factor gef64c, Swim - secreted wg-interacting molecule, CG8965 - cg8965 gene product from transcript cg8965-ra, CG17494 - cg17494 gene product from transcript cg17494-ra, GNBP1 - gram-negat
GO:0001752	0.000138	compound eye photoreceptor fate commitment	0.000138	0.00286	2.07	7301	36	2054	21	[ast - asteroid, rl - rolled, ru - roughoid, phl - pole hole, svp - seven up, scrib - scribbled, stan - starry night, elB - elbow b, fz - frizzled, klg - klingon, rho - rhomboid, msi - musashi, hth - homothorax, pros - prospero
GO:0008306	0.000138	associative learning	0.000138	0.00286	2.07	7301	36	2054	21	[drl - derailed, Egfr - epidermal growth factor receptor, prt - portabella, Ent2 - equilibrative nucleoside transporter 2, mnb - minibrain, dnc - dunce, sgg - shaggy, vn - vein, chico - cg5686 gene product from transcript cg5686-rb, Pka-
GO:0042706	0.000138	eye photoreceptor cell fate commitment	0.000138	0.00285	2.07	7301	36	2054	21	[ast - asteroid, rl - rolled, ru - roughoid, phl - pole hole, scrib - scribbled, svp - seven up, stan - starry night, fz - frizzled, elB - elbow b, klg - klingon, rho - rhomboid, msi - musashi, hth - homothorax, pros - prospero
GO:2000253	0.000138	positive regulation of feeding behavior	0.000138	0.00285	3.55	7301	7	2054	7	[Pka-R1 - camp-dependent protein kinase r1, 5-HT2 - serotonin receptor 2, sNPF-R - short neuropeptide f receptor, Sir2 - cg5216 gene product from transcript cg5216-ra, mnb - minibrain, foxo - forkhead box, sub-group o, G-salpha60A - g protei
GO:0051962	0.000147	positive regulation of nervous system development	0.000147	0.00302	1.67	7301	85	2054	40	[EcR - ecdysone receptor, Gap1 - gtpase-activating protein 1, rl - rolled, phl - pole hole, Ank2 - ankyrin 2, cac - cacophony, oc - ocelliless, Src64B - src oncogene at 64b, dlg1 - discs large 1, nudC - cg9710 gene product from transcr
GO:0006873	0.000151	cellular ion homeostasis	0.000151	0.0031	1.71	7301	77	2054	37	[phl - pole hole, cac - cacophony, trpgamma - cg5996 gene product from transcript cg5996-rd, SPoCk - secretory pathway calcium atpase, norpA - no receptor potential a, Atpalpha - na pump alpha subunit, Rab14 - cg4212 gene product from transc
GO:0051254	0.000155	positive regulation of RNA metabolic process	0.000155	0.00317	1.36	7301	266	2054	102	[Rpt6R - cg2241 gene product from transcript cg2241-ra, pnr - pannier, ss - spineless, vnd - ventral nervous system defective, Abd-B - abdominal b, N - notch, CG43444 - cg43444 gene product from transcript cg43444-ra, nau - nautilus, Mef2
GO:0021782	0.000165	glial cell development	0.000165	0.00336	2.24	7301	27	2054	17	[sinu - sinuous, G-oalpha47A - g protein oalpha 47a, svp - seven up, CG8965 - cg8965 gene product from transcript cg8965-ra, cora - coracle, Mdr65 - multiple drug resistance 65, Pex1 - peroxin 1, sty - sprouty, fog - folded gastrulation,
GO:0048190	0.00017	wing disc dorsal/ventral pattern formation	0.00017	0.00344	2.09	7301	34	2054	20	[CG14073 - cg14073 gene product from transcript cg14073-rc, skd - skuld, l(2)08717 - lethal (2) 08717, cic - capicua, CG13830 - cg13830 gene product from transcript cg13830-rd, dlp - dally-like, dally - division abnormally delayed, nuf - n
GO:0007450	0.00017	dorsal/ventral pattern formation, imaginal disc	0.00017	0.00343	2.09	7301	34	2054	20	[CG14073 - cg14073 gene product from transcript cg14073-rc, skd - skuld, l(2)08717 - lethal (2) 08717, cic - capicua, CG13830 - cg13830 gene product from transcript cg13830-rd, dlp - dally-like, nuf - nuclear fallout, dally - division abno
GO:0050877	0.00017	nervous system process	0.00017	0.00342	1.29	7301	403	2054	146	[nemy - no extended memory, if - inflated, scrib - scribbled, trpgamma - cg5996 gene product from transcript cg5996-rd, CG6053 - cg6053 gene product from transcript cg6053-rc, dnc - dunce, CG5644 - cg5644 gene product from transcript cg5644-
GO:0010628	0.000186	positive regulation of gene expression	0.000186	0.00373	1.33	7301	307	2054	115	[Rpt6R - cg2241 gene product from transcript cg2241-ra, pnr - pannier, p - pink, ss - spineless, vnd - ventral nervous system defective, Abd-B - abdominal b, bol - boule, N - notch, CG43444 - cg43444 gene product from transcript cg43444-
GO:0045596	0.000188	negative regulation of cell differentiation	0.000188	0.00377	1.63	7301	94	2054	43	[EcR - ecdysone receptor, Gap1 - gtpase-activating protein 1, brat - brain tumor, Egfr - epidermal growth factor receptor, CG9634 - cg9634 gene product from transcript cg9634-ra, numb - cg3779 gene product from transcript cg3779-rb, norpA -
GO:0030003	0.00019	cellular cation homeostasis	0.00019	0.0038	1.71	7301	75	2054	36	[phl - pole hole, cac - cacophony, trpgamma - cg5996 gene product from transcript cg5996-rd, SPoCk - secretory pathway calcium atpase, norpA - no receptor potential a, Atpalpha - na pump alpha subunit, Rab14 - cg4212 gene product from transc
GO:0008039	0.000196	synaptic target recognition	0.000196	0.0039	2.27	7301	25	2054	16	[acj6 - abnormal chemosensory jump 6, Ten-m - tenascin major, pot - papillote, tutl - turtle, hig - hikaru genki, wdp - windpipe, CG5758 - cg5758 gene product from transcript cg5758-rc, ab - abrupt, slow - slowdown, Pvf3 - pdgf- and ve
GO:0045944	0.000197	positive regulation of transcription by RNA polymerase II	0.000197	0.00391	1.42	7301	198	2054	79	[tou - toutatis, EcR - ecdysone receptor, Nipped-B - cg17704 gene product from transcript cg17704-rg, mam - mastermind, en - engrailed, CG8312 - cg8312 gene product from transcript cg8312-ra, oc - ocelliless, Rpt6R - cg2241 gene product fr
GO:0007186	0.000205	G protein-coupled receptor signaling pathway	0.000205	0.00406	1.48	7301	154	2054	64	[inaE - inactivation no afterpotential e, 5-HT2 - serotonin receptor 2, SPR - sex peptide receptor, fz - frizzled, CG42796 - cg42796 gene product from transcript cg42796-re, fog - folded gastrulation, mtt - mangetout, cta - concertina, mth
GO:0008150	0.000226	biological_process	0.000226	0.00447	1.02	7301	6717	2054	1926	[CG8632 - cg8632 gene product from transcript cg8632-ra, nemy - no extended memory, CG42708 - cg42708 gene product from transcript cg42708-ra, Task6 - cg9637 gene product from transcript cg9637-rd, CG8771 - cg8771 gene product from transcript cg
GO:0061333	0.00023	renal tubule morphogenesis	0.00023	0.00452	2.32	7301	23	2054	15	[EcR - ecdysone receptor, Egfr - epidermal growth factor receptor, rib - ribbon, ct - cut, vkg - viking, crb - crumbs, raw - cg12437 gene product from transcript cg12437-rb, byn - brachyenteron, pbl - pebble, crn - crooked neck, Kr -
GO:0007443	0.00023	Malpighian tubule morphogenesis	0.00023	0.00451	2.32	7301	23	2054	15	[EcR - ecdysone receptor, Egfr - epidermal growth factor receptor, rib - ribbon, ct - cut, vkg - viking, crb - crumbs, raw - cg12437 gene product from transcript cg12437-rb, byn - brachyenteron, pbl - pebble, crn - crooked neck, Kr -
GO:0007409	0.000235	axonogenesis	0.000235	0.0046	2.02	7301	37	2054	21	[mid - midline, sick - sickie, drl - derailed, en - engrailed, hh - hedgehog, stan - starry night, erm - earmuff, Abl - abl tyrosine kinase, Gclc - glutamate-cysteine ligase catalytic subunit, rho - rhomboid, Cul-3 - cullin-3, dally
GO:0055065	0.000239	metal ion homeostasis	0.000239	0.00467	1.7	7301	73	2054	35	[Mco1 - multicopper oxidase-1, trpgamma - cg5996 gene product from transcript cg5996-rd, cac - cacophony, norpA - no receptor potential a, SPoCk - secretory pathway calcium atpase, Atpalpha - na pump alpha subunit, scaf6 - cg33522 gene produ
GO:0046620	0.000247	regulation of organ growth	0.000247	0.0048	1.95	7301	42	2054	23	[sfl - sulfateless, ex - expanded, d - dachs, Egfr - epidermal growth factor receptor, scrib - scribbled, hipk - homeodomain interacting protein kinase, Zyx - zyxin, bchs - blue cheese, kibra - kibra ortholog, dlg1 - discs large 1, crb
GO:0010453	0.000255	regulation of cell fate commitment	0.000255	0.00494	2.13	7301	30	2054	18	[Gap1 - gtpase-activating protein 1, H15 - cg6604 gene product from transcript cg6604-ra, mid - midline, Src64B - src oncogene at 64b, Ubx - ultrabithorax, sv - shaven, cdi - center divider, bun - bunched, hth - homothorax, pros - pros
GO:0048732	0.000255	gland development	0.000255	0.00493	2.13	7301	30	2054	18	[kuz - kuzbanian, CrebA - cyclic-amp response element binding protein a, Egfr - epidermal growth factor receptor, retn - retained, rib - ribbon, if - inflated, sog - short gastrulation, kug - kugelei, pnr - pannier, Ser - serrate, Antp
GO:0001708	0.000262	cell fate specification	0.000262	0.00505	1.78	7301	60	2054	30	[mid - midline, Egfr - epidermal growth factor receptor, hh - hedgehog, E(spl)m2-BFM - enhancer of split m2, bearded family member, scrib - scribbled, numb - cg3779 gene product from transcript cg3779-rb, CycE - cyclin e, dlg1 - discs larg
GO:0007615	0.000263	anesthesia-resistant memory	0.000263	0.00505	3.16	7301	9	2054	8	[5-HT1A - serotonin receptor 1a, rut - rutabaga, D2R - dopamine 2-like receptor, CG18769 - cg18769 gene product from transcript cg18769-rh, CASK - cask ortholog, Pka-C1 - camp-dependent protein kinase 1, dnc - dunce, CG4495 - cg4495 gene p
GO:0010959	0.000266	regulation of metal ion transport	0.000266	0.0051	2.37	7301	21	2054	14	[Rgk3 - cg34397 gene product from transcript cg34397-rd, capaR - capa receptor, Teh4 - tipe homolog 4, Ent2 - equilibrative nucleoside transporter 2, Ca-beta - ca2+-channel-protein-beta-subunit, cac - cacophony, CG3078 - cg3078 gene product
GO:0016318	0.000266	ommatidial rotation	0.000266	0.00509	2.37	7301	21	2054	14	[Egfr - epidermal growth factor receptor, cno - canoe, stan - starry night, sty - sprouty, fz - frizzled, fred - friend of echinoid, gish - gilgamesh, spi - spitz, CadN - cadherin-n, nmo - nemo, ed - echinoid, CadN2 - cadherin-n2,
GO:0098655	0.000277	cation transmembrane transport	0.000277	0.00528	1.55	7301	115	2054	50	[Task6 - cg9637 gene product from transcript cg9637-rd, trpgamma - cg5996 gene product from transcript cg5996-rd, cac - cacophony, SK - small conductance calcium-activated potassium channel, CG1688 - cg1688 gene product from transcript cg1688-ra
GO:0034329	0.000283	cell junction assembly	0.000283	0.00539	1.81	7301	55	2054	28	[p120ctn - adherens junction protein p120, scrib - scribbled, sdt - stardust, CG14521 - cg14521 gene product from transcript cg14521-ra, Atpalpha - na pump alpha subunit, cora - coracle, dlg1 - discs large 1, Src64B - src oncogene at 64b,
GO:0010632	0.000311	regulation of epithelial cell migration	0.000311	0.00589	2.16	7301	28	2054	17	[kuz - kuzbanian, Egfr - epidermal growth factor receptor, hh - hedgehog, grk - gurken, vn - vein, lea - leak, mbc - myoblast city, spi - spitz, sli - slit, bnl - branchless, Tie - tie-like receptor tyrosine kinase, puc - puckered,
GO:0007365	0.000311	periodic partitioning	0.000311	0.00587	2.16	7301	28	2054	17	[sfl - sulfateless, Egfr - epidermal growth factor receptor, hh - hedgehog, en - engrailed, CG13830 - cg13830 gene product from transcript cg13830-rd, AGO1 - argonaute-1, stan - starry night, fz - frizzled, dlp - dally-like, sgg - shag
GO:0010721	0.00033	negative regulation of cell development	0.00033	0.00622	1.78	7301	58	2054	29	[Gap1 - gtpase-activating protein 1, EcR - ecdysone receptor, brat - brain tumor, Egfr - epidermal growth factor receptor, numb - cg3779 gene product from transcript cg3779-rb, norpA - no receptor potential a, Abl - abl tyrosine kinase, Fas2
GO:0045433	0.000335	male courtship behavior, veined wing generated song production	0.000335	0.00631	2.51	7301	17	2054	12	[nonA - no on or off transient a, FoxP - forkhead box p, corto - cg2530 gene product from transcript cg2530-rc, fru - fruitless, cac - cacophony, dsx - doublesex, Alh - alhambra, Moe - moesin, Hr39 - hormone receptor-like in 39, btv -
GO:0072499	0.000335	photoreceptor cell axon guidance	0.000335	0.00629	2.51	7301	17	2054	12	[dysc - dyschronic, chif - chiffon, hts - hu li tai shao, Fas2 - fasciclin 2, CG14521 - cg14521 gene product from transcript cg14521-ra, eya - eyes absent, Moe - moesin, gogo - golden goal, caps - capricious, erm - earmuff, Abl - abl
GO:0007472	0.000335	wing disc morphogenesis	0.000335	0.00627	2.51	7301	17	2054	12	[Timp - tissue inhibitor of metalloproteases, dally - division abnormally delayed, Egfr - epidermal growth factor receptor, en - engrailed, phl - pole hole, bi - bifid, scrib - scribbled, Pkn - protein kinase related to protein kinase n, g
GO:0051924	0.000335	regulation of calcium ion transport	0.000335	0.00626	2.91	7301	11	2054	9	[capaR - capa receptor, Rgk3 - cg34397 gene product from transcript cg34397-rd, Ca-beta - ca2+-channel-protein-beta-subunit, Ent2 - equilibrative nucleoside transporter 2, cac - cacophony, olf186-F - cg11430 gene product from transcript cg1143
GO:0007043	0.000357	cell-cell junction assembly	0.000357	0.00665	1.81	7301	53	2054	27	[p120ctn - adherens junction protein p120, scrib - scribbled, sdt - stardust, CG14521 - cg14521 gene product from transcript cg14521-ra, cora - coracle, Atpalpha - na pump alpha subunit, dlg1 - discs large 1, Src64B - src oncogene at 64b,
GO:1900073	0.000359	regulation of neuromuscular synaptic transmission	0.000359	0.00665	2.61	7301	15	2054	11	[dysc - dyschronic, GluRIIA - glutamate receptor iia, Syp - syncrip, Syt1 - synaptotagmin 1, Ank2 - ankyrin 2, Alk - cg8250 gene product from transcript cg8250-rb, jeb - jelly belly, CASK - cask ortholog, slo - slowpoke, Plc21C - phosp
GO:0070593	0.000359	dendrite self-avoidance	0.000359	0.00663	2.61	7301	15	2054	11	[Dscam - down syndrome cell adhesion molecule, Fas2 - fasciclin 2, esn - espinas, Dscam3 - down syndrome cell adhesion molecule 3, tutl - turtle, stan - starry night, Bsg - basigin, Sema-2b - semaphorin-2b, Dscam4 - down syndrome cell ad
GO:0042753	0.000359	positive regulation of circadian rhythm	0.000359	0.00661	2.61	7301	15	2054	11	[EcR - ecdysone receptor, Hk - hyperkinetic, ctrip - circadian trip, cue - cueball, Ih - i[[h]] channel, Shab - shaker cognate b, mld - molting defective, Sh - shaker, Oamb - octopamine receptor in mushroom bodies, rho-5 - rhomboid-5,
GO:0003013	0.000363	circulatory system process	0.000363	0.00667	2.73	7301	13	2054	10	[H15 - cg6604 gene product from transcript cg6604-ra, sinu - sinuous, spi - spitz, mid - midline, Egfr - epidermal growth factor receptor, ru - roughoid, cora - coracle, wry - weary, loco - locomotion defects, pnr - pannier]
GO:0003015	0.000363	heart process	0.000363	0.00665	2.73	7301	13	2054	10	[H15 - cg6604 gene product from transcript cg6604-ra, sinu - sinuous, spi - spitz, mid - midline, Egfr - epidermal growth factor receptor, ru - roughoid, cora - coracle, wry - weary, loco - locomotion defects, pnr - pannier]
GO:0042078	0.000377	germ-line stem cell division	0.000377	0.00689	2.19	7301	26	2054	16	[hh - hedgehog, pum - pumilio, egg - eggless, SoYb - sister of yb, chico - cg5686 gene product from transcript cg5686-rb, tkv - thickveins, dally - division abnormally delayed, pelo - pelota, msi - musashi, Mad - mothers against dpp, s
GO:0051301	0.000439	cell division	0.000439	0.00801	1.58	7301	97	2054	43	[enc - encore, brat - brain tumor, mam - mastermind, hh - hedgehog, pum - pumilio, numb - cg3779 gene product from transcript cg3779-rb, egg - eggless, Pex1 - peroxin 1, CycE - cyclin e, fz - frizzled, neur - neuralized, SoYb - sis
GO:0055085	0.00045	transmembrane transport	0.00045	0.00819	1.26	7301	417	2054	148	[CG8632 - cg8632 gene product from transcript cg8632-ra, CG12531 - cg12531 gene product from transcript cg12531-ra, Task6 - cg9637 gene product from transcript cg9637-rd, trpgamma - cg5996 gene product from transcript cg5996-rd, Mdr65 - multiple
GO:0016319	0.000451	mushroom body development	0.000451	0.00818	1.81	7301	51	2054	26	[EcR - ecdysone receptor, drl - derailed, Src64B - src oncogene at 64b, ab - abrupt, robo3 - cg5423 gene product from transcript cg5423-rb, SMC1 - cg6057 gene product from transcript cg6057-ra, vap - vacuolar peduncle, Fas2 - fasciclin 2,
GO:0009187	0.000454	cyclic nucleotide metabolic process	0.000454	0.00822	2.22	7301	24	2054	15	[Ac76E - adenylyl cyclase 76e, Gycbeta100B - guanylyl cyclase beta-subunit at 100b, CG34357 - cg34357 gene product from transcript cg34357-rd, Pde6 - phosphodiesterase 6, Gyc-89Db - guanylyl cyclase at 89db, Gyc-89Da - guanylyl cyclase at 89da
GO:0042325	0.000468	regulation of phosphorylation	0.000468	0.00845	1.45	7301	152	2054	62	[SNF4Agamma - snf4/amp-activated protein kinase gamma subunit, wee - cg4488 gene product from transcript cg4488-rb, CG8312 - cg8312 gene product from transcript cg8312-ra, Stlk - ste20-like kinase, CG17124 - cg17124 gene product from transcript
GO:0051046	0.000477	regulation of secretion	0.000477	0.00858	1.75	7301	59	2054	29	[ru - roughoid, nemy - no extended memory, Dys - dystrophin, Syt1 - synaptotagmin 1, Frq1 - frequenin 1, cmpy - crimpy, cac - cacophony, Glut1 - glucose transporter 1, BicD - bicaudal d, Flo-2 - flotillin-2, Syt7 - cg2381 gene produc
GO:0034249	0.000491	negative regulation of cellular amide metabolic process	0.000491	0.00882	1.91	7301	41	2054	22	[brat - brain tumor, pum - pumilio, A2bp1 - ataxin-2 binding protein 1, AGO1 - argonaute-1, nub - nubbin, bru-3 - bruno-3, heph - hephaestus, Rcd-1r - rcd-1 related, gw - gawky, bin3 - bicoid-interacting protein 3, Tis11 - tis11 homo
GO:0035567	0.000493	non-canonical Wnt signaling pathway	0.000493	0.00883	3.55	7301	6	2054	6	[Wnt4 - wnt oncogene analog 4, G-oalpha47A - g protein oalpha 47a, fz4 - frizzled 4, fz2 - frizzled 2, fz - frizzled, fz3 - frizzled 3]
GO:0007415	0.000493	defasciculation of motor neuron axon	0.000493	0.00881	3.55	7301	6	2054	6	[Ptp69D - protein tyrosine phosphatase 69d, Ptp99A - protein tyrosine phosphatase 99a, beat-Ic - beaten path ic, tok - tolkin, beat-Ia - beaten path ia, pbl - pebble]
GO:0046847	0.000493	filopodium assembly	0.000493	0.00879	3.55	7301	6	2054	6	[sn - singed, mim - missing-in-metastasis, ena - enabled, bnl - branchless, CG32082 - cg32082 gene product from transcript cg32082-ra, Myo10A - myosin 10a]
GO:0001932	0.000538	regulation of protein phosphorylation	0.000538	0.00956	1.47	7301	138	2054	57	[SNF4Agamma - snf4/amp-activated protein kinase gamma subunit, wee - cg4488 gene product from transcript cg4488-rb, CG8312 - cg8312 gene product from transcript cg8312-ra, Stlk - ste20-like kinase, raw - cg12437 gene product from transcript cg12
GO:0042659	0.000543	regulation of cell fate specification	0.000543	0.00962	2.26	7301	22	2054	14	[H15 - cg6604 gene product from transcript cg6604-ra, mid - midline, Ubx - ultrabithorax, sv - shaven, bun - bunched, hth - homothorax, pros - prospero, ush - u-shaped, eya - eyes absent, aop - anterior open, ed - echinoid, Abd-B -
GO:0007526	0.000543	larval somatic muscle development	0.000543	0.00959	2.26	7301	22	2054	14	[ast - asteroid, nau - nautilus, skd - skuld, crp - cropped, spz - spatzle, Tl - toll, kn - knot, ths - thisbe, Sin3A - cg8815 gene product from transcript cg8815-rc, Poxm - pox meso, eya - eyes absent, Alh - alhambra, pyr - pyra
GO:0030155	0.000606	regulation of cell adhesion	0.000606	0.0107	1.99	7301	34	2054	19	[Timp - tissue inhibitor of metalloproteases, Ten-m - tenascin major, dlg1 - discs large 1, Sema-2b - semaphorin-2b, CG16742 - cg16742 gene product from transcript cg16742-ra, pgant3 - polypeptide galnac transferase 3, lea - leak, tkv - th
GO:0006816	0.000618	calcium ion transport	0.000618	0.0109	1.91	7301	39	2054	21	[nompC - no mechanoreceptor potential c, wtrw - water witch, Ca-alpha1D - ca[2+]-channel protein alpha[[1]] subunit d, Ca-beta - ca2+-channel-protein-beta-subunit, trpgamma - cg5996 gene product from transcript cg5996-rd, SPoCk - secretory pat
GO:0007367	0.000684	segment polarity determination	0.000684	0.012	2.11	7301	27	2054	16	[sfl - sulfateless, Egfr - epidermal growth factor receptor, en - engrailed, hh - hedgehog, CG13830 - cg13830 gene product from transcript cg13830-rd, AGO1 - argonaute-1, stan - starry night, fz - frizzled, dlp - dally-like, pan - pang
GO:0007427	0.000684	epithelial cell migration, open tracheal system	0.000684	0.012	2.11	7301	27	2054	16	[sfl - sulfateless, ru - roughoid, sr - stripe, hh - hedgehog, rib - ribbon, dlp - dally-like, dally - division abnormally delayed, sli - slit, bnl - branchless, Mhc - myosin heavy chain, stumps - cg31317 gene product from transcript
GO:0009798	0.000714	axis specification	0.000714	0.0125	1.6	7301	82	2054	37	[Gap1 - gtpase-activating protein 1, enc - encore, Egfr - epidermal growth factor receptor, phl - pole hole, hh - hedgehog, scrib - scribbled, clos - closca, pum - pumilio, cic - capicua, grk - gurken, cnc - cap-n-collar, dlg1 - di
GO:0001558	0.000719	regulation of cell growth	0.000719	0.0125	1.82	7301	47	2054	24	[kuz - kuzbanian, Cdk4 - cyclin-dependent kinase 4, CG5794 - cg5794 gene product from transcript cg5794-rf, pk - prickle, cic - capicua, cmpy - crimpy, Sema-2a - cg4700 gene product from transcript cg4700-rc, stan - starry night, fz - fr
GO:0044057	0.000719	regulation of system process	0.000719	0.0125	1.82	7301	47	2054	24	[Shab - shaker cognate b, Grd - glycine receptor, cac - cacophony, AGO1 - argonaute-1, CG3078 - cg3078 gene product from transcript cg3078-ra, vri - vrille, Sox102F - cg11153 gene product from transcript cg11153-rb, eag - ether a go-go, Rd
GO:2000241	0.00072	regulation of reproductive process	0.00072	0.0125	1.65	7301	71	2054	33	[kuz - kuzbanian, enc - encore, Egfr - epidermal growth factor receptor, SPR - sex peptide receptor, Syt1 - synaptotagmin 1, spn-E - spindle e, gwl - greatwall, grk - gurken, cnc - cap-n-collar, dlg1 - discs large 1, mtrm - matrimony
GO:0009891	0.000741	positive regulation of biosynthetic process	0.000741	0.0128	1.3	7301	301	2054	110	[Rpt6R - cg2241 gene product from transcript cg2241-ra, pnr - pannier, chif - chiffon, cact - cactus, ss - spineless, vnd - ventral nervous system defective, Abd-B - abdominal b, bol - boule, N - notch, CG43444 - cg43444 gene product f
GO:0031328	0.000741	positive regulation of cellular biosynthetic process	0.000741	0.0128	1.3	7301	301	2054	110	[Rpt6R - cg2241 gene product from transcript cg2241-ra, pnr - pannier, chif - chiffon, cact - cactus, ss - spineless, vnd - ventral nervous system defective, Abd-B - abdominal b, bol - boule, N - notch, CG43444 - cg43444 gene product f
GO:0009790	0.000758	embryo development	0.000758	0.013	2	7301	32	2054	18	[grp - grapes, wee - cg4488 gene product from transcript cg4488-rb, Egfr - epidermal growth factor receptor, mirr - mirror, step - steppke, oc - ocelliless, cora - coracle, Nc - nedd2-like caspase, gw - gawky, Eip63E - ecdysone-induced
GO:0009792	0.000758	embryo development ending in birth or egg hatching	0.000758	0.013	2	7301	32	2054	18	[grp - grapes, Egfr - epidermal growth factor receptor, wee - cg4488 gene product from transcript cg4488-rb, mirr - mirror, step - steppke, cora - coracle, oc - ocelliless, Nc - nedd2-like caspase, gw - gawky, Eip63E - ecdysone-induced
GO:0006875	0.000759	cellular metal ion homeostasis	0.000759	0.013	1.74	7301	55	2054	27	[cac - cacophony, trpgamma - cg5996 gene product from transcript cg5996-rd, SPoCk - secretory pathway calcium atpase, norpA - no receptor potential a, Atpalpha - na pump alpha subunit, scaf6 - cg33522 gene product from transcript cg33522-rd, C
GO:1903530	0.000759	regulation of secretion by cell	0.000759	0.0129	1.74	7301	55	2054	27	[ru - roughoid, nemy - no extended memory, Dys - dystrophin, Syt1 - synaptotagmin 1, Frq1 - frequenin 1, cmpy - crimpy, cac - cacophony, Glut1 - glucose transporter 1, BicD - bicaudal d, Flo-2 - flotillin-2, Sytbeta - synaptotagmin b
GO:0048608	0.000761	reproductive structure development	0.000761	0.0129	1.86	7301	42	2054	22	[Egfr - epidermal growth factor receptor, mid - midline, hh - hedgehog, en - engrailed, rib - ribbon, ct - cut, Wnt4 - wnt oncogene analog 4, dsx - doublesex, dve - defective proventriculus, raw - cg12437 gene product from transcript c
GO:0110053	0.000761	regulation of actin filament organization	0.000761	0.0129	1.86	7301	42	2054	22	[spir - spire, twf - twinfilin, if - inflated, Arpc2 - actin-related protein 2/3 complex, subunit 2, Src64B - src oncogene at 64b, CG43658 - cg43658 gene product from transcript cg43658-rc, fz - frizzled, Abl - abl tyrosine kinase, tmod -
GO:0098662	0.000798	inorganic cation transmembrane transport	0.000798	0.0135	1.52	7301	105	2054	45	[nompC - no mechanoreceptor potential c, Task6 - cg9637 gene product from transcript cg9637-rd, Ca-beta - ca2+-channel-protein-beta-subunit, Ca-alpha1T - ca[2+]-channel protein alpha[[1]] subunit t, trpgamma - cg5996 gene product from transcript
GO:1902680	0.000814	positive regulation of RNA biosynthetic process	0.000814	0.0137	1.32	7301	255	2054	95	[tou - toutatis, EcR - ecdysone receptor, Nipped-B - cg17704 gene product from transcript cg17704-rg, mam - mastermind, en - engrailed, retn - retained, CG8312 - cg8312 gene product from transcript cg8312-ra, Eip93F - ecdysone-induced prot
GO:0045893	0.000814	positive regulation of transcription, DNA-templated	0.000814	0.0137	1.32	7301	255	2054	95	[tou - toutatis, EcR - ecdysone receptor, Nipped-B - cg17704 gene product from transcript cg17704-rg, mam - mastermind, en - engrailed, retn - retained, CG8312 - cg8312 gene product from transcript cg8312-ra, Eip93F - ecdysone-induced prot
GO:1903508	0.000814	positive regulation of nucleic acid-templated transcription	0.000814	0.0137	1.32	7301	255	2054	95	[tou - toutatis, EcR - ecdysone receptor, Nipped-B - cg17704 gene product from transcript cg17704-rg, mam - mastermind, en - engrailed, retn - retained, CG8312 - cg8312 gene product from transcript cg8312-ra, Eip93F - ecdysone-induced prot
GO:0098657	0.000824	import into cell	0.000824	0.0138	1.51	7301	108	2054	46	[nimA - nimrod a, Syt1 - synaptotagmin 1, TM9SF4 - cg7364 gene product from transcript cg7364-ra, Atpalpha - na pump alpha subunit, lap - like-ap180, slif - slimfast, BicD - bicaudal d, lt - light, neuroligin - cg13772 gene product from
GO:0016204	0.000836	determination of muscle attachment site	0.000836	0.014	3.11	7301	8	2054	7	[kn - knot, nau - nautilus, drl - derailed, sr - stripe, Grip - glutamate receptor binding protein, shot - short stop, vg - vestigial]
GO:0035161	0.000836	imaginal disc lineage restriction	0.000836	0.0139	3.11	7301	8	2054	7	[Ser - serrate, hh - hedgehog, en - engrailed, Dl - delta, vg - vestigial, fng - fringe, N - notch]
GO:0050768	0.000838	negative regulation of neurogenesis	0.000838	0.0139	1.78	7301	50	2054	25	[EcR - ecdysone receptor, Gap1 - gtpase-activating protein 1, brat - brain tumor, numb - cg3779 gene product from transcript cg3779-rb, Abl - abl tyrosine kinase, Fas2 - fasciclin 2, cdi - center divider, stl - stall, CadN - cadherin-n,
GO:0001894	0.000841	tissue homeostasis	0.000841	0.014	2.13	7301	25	2054	15	[Egfr - epidermal growth factor receptor, Mkp3 - mitogen-activated protein kinase phosphatase 3, if - inflated, Atpalpha - na pump alpha subunit, wdp - windpipe, crb - crumbs, Lac - lachesin, Atg1 - autophagy-specific gene 1, rho - rhomb
GO:0038127	0.000855	ERBB signaling pathway	0.000855	0.0142	2.44	7301	16	2054	11	[rl - rolled, spi - spitz, Egfr - epidermal growth factor receptor, phl - pole hole, cic - capicua, grk - gurken, aop - anterior open, drk - downstream of receptor kinase, pnt - pointed, spen - split ends, vn - vein]
GO:0042067	0.000855	establishment of ommatidial planar polarity	0.000855	0.0141	2.44	7301	16	2054	11	[d - dachs, fw - furrowed, pk - prickle, scrib - scribbled, stan - starry night, Dl - delta, fz - frizzled, hbs - hibris, sano - serrano, rdx - roadkill, N - notch]
GO:0007173	0.000855	epidermal growth factor receptor signaling pathway	0.000855	0.0141	2.44	7301	16	2054	11	[rl - rolled, spi - spitz, Egfr - epidermal growth factor receptor, phl - pole hole, cic - capicua, grk - gurken, aop - anterior open, drk - downstream of receptor kinase, pnt - pointed, spen - split ends, vn - vein]
GO:0051588	0.000855	regulation of neurotransmitter transport	0.000855	0.0141	2.44	7301	16	2054	11	[GluRIIA - glutamate receptor iia, NFAT - nfat homolog, nemy - no extended memory, Dys - dystrophin, Ih - i[[h]] channel, Frq1 - frequenin 1, cac - cacophony, CASK - cask ortholog, cpx - complexin, BicD - bicaudal d, Mctp - multiple
GO:0035168	0.000855	larval lymph gland hemocyte differentiation	0.000855	0.014	2.44	7301	16	2054	11	[ths - thisbe, rl - rolled, Ser - serrate, phl - pole hole, sty - sprouty, ush - u-shaped, pyr - pyramus, dpp - decapentaplegic, Dif - dorsal-related immunity factor, N - notch, pnt - pointed]
GO:0046928	0.000855	regulation of neurotransmitter secretion	0.000855	0.014	2.44	7301	16	2054	11	[GluRIIA - glutamate receptor iia, NFAT - nfat homolog, nemy - no extended memory, Dys - dystrophin, Ih - i[[h]] channel, Frq1 - frequenin 1, cac - cacophony, CASK - cask ortholog, cpx - complexin, BicD - bicaudal d, Mctp - multiple
GO:0048609	0.00092	multicellular organismal reproductive process	0.00092	0.015	1.29	7301	312	2054	113	[sfl - sulfateless, Mmp2 - matrix metalloproteinase 2, CG9634 - cg9634 gene product from transcript cg9634-ra, egg - eggless, CG6053 - cg6053 gene product from transcript cg6053-rc, dnc - dunce, Nep2 - neprilysin 2, neuroligin - cg13772 ge
GO:0055082	0.000945	cellular chemical homeostasis	0.000945	0.0154	1.58	7301	83	2054	37	[phl - pole hole, cac - cacophony, trpgamma - cg5996 gene product from transcript cg5996-rd, SPoCk - secretory pathway calcium atpase, norpA - no receptor potential a, Atpalpha - na pump alpha subunit, Rab14 - cg4212 gene product from transc
GO:0044719	0.000949	regulation of imaginal disc-derived wing size	0.000949	0.0154	2.54	7301	14	2054	10	[bib - big brain, dp - dumpy, fru - fruitless, magu - cg2264 gene product from transcript cg2264-rd, slow - slowdown, CycE - cyclin e, ab - abrupt, Btk29A - btk family kinase at 29a, path - pathetic, vg - vestigial]
GO:0017145	0.000958	stem cell division	0.000958	0.0155	1.74	7301	53	2054	26	[brat - brain tumor, hh - hedgehog, numb - cg3779 gene product from transcript cg3779-rb, pum - pumilio, egg - eggless, SoYb - sister of yb, loco - locomotion defects, tkv - thickveins, baz - bazooka, pie - pineapple eye, chico - cg5
GO:0007274	0.00098	neuromuscular synaptic transmission	0.00098	0.0158	1.93	7301	35	2054	19	[Dys - dystrophin, Ten-m - tenascin major, twf - twinfilin, fusl - fuseless, cpx - complexin, Slob - slowpoke binding protein, GluRIIE - glutamate receptor iie, neuroligin - cg13772 gene product from transcript cg13772-rb, GluRIIC - glut
GO:0048100	0.000987	wing disc anterior/posterior pattern formation	0.000987	0.0159	2.84	7301	10	2054	8	[tkv - thickveins, inv - invected, en - engrailed, hh - hedgehog, bi - bifid, Mad - mothers against dpp, shn - schnurri, dpp - decapentaplegic]
GO:0007548	0.000987	sex differentiation	0.000987	0.0159	2.84	7301	10	2054	8	[fru - fruitless, Pdk1 - phosphoinositide-dependent kinase 1, dsx - doublesex, bab1 - bric a brac 1, Scr - sex combs reduced, Sxl - sex lethal, Abd-B - abdominal b, W - wrinkled]
